# Supplementary material for: NPM1 Is a Prognostic Biomarker Involved in Immune Infiltration of Lung Adenocarcinoma and Associated With m6A Modification and Glycolysis
Source: Front Immunol. 2021 Jul 16;12:724741. doi: 10.3389/fimmu.2021.724741 (PMC8324208; doi:10.3389/fimmu.2021.724741)
Supplement: Supplementary file 3 [file Table_3.xlsx]

## Sheet: Sheet 1
Supplementary Table 3. NPM1 GSEA in LUAD
ID	Description	setSize	enrichmentScore	NES	pvalue	p.adjust	qvalues	rank	leading_edge	core_enrichment
KEGG_SYSTEMIC_LUPUS_ERYTHEMATOSUS	KEGG_SYSTEMIC_LUPUS_ERYTHEMATOSUS	134	-0.694084	-1.58131	0.000999001	0.044773	0.0379447	5577	tags=34%, list=15%, signal=29%	ACTN2/C8A/H2AC8/H2BC8/H4C8/ELANE/H2AC11/H3C4/H3C8/H2BC11/H2BU1/H2AC13/H2BC1/H4C11/H3-4/H2AC20/H2AC7/H2BC18/H4-16/C6/H2BC17/H2AC17/H3C13/H2BC9/H3C12/H2BC13/H2BC7/H2AC16/H2BC6/H4C5/H3C1/H4C2/H2AC4/H2AC12/H2AC14/H2AC21/H4C1/H2BC14/H3C7/H4C3/H3C11/H4C4/H2BC10/H2BC3/H4C13/H4C6
REACTOME_ACTIVATION_OF_ANTERIOR_HOX_GENES_IN_HINDBRAIN_DEVELOPMENT_DURING_EARLY_EMBRYOGENESIS	REACTOME_ACTIVATION_OF_ANTERIOR_HOX_GENES_IN_HINDBRAIN_DEVELOPMENT_DURING_EARLY_EMBRYOGENESIS	120	-0.655918	-1.48886	0.000999001	0.044773	0.0379447	5318	tags=30%, list=15%, signal=26%	H2AC8/H2BC8/H4C8/H3C4/H3C8/H2BC11/HOXB3/H2BU1/H2BC1/HOXB1/H4C11/H2AC20/H2AC7/H4-16/H2BC17/H3C13/H2BC9/H3C12/H2BC13/H2BC7/H2BC6/H4C5/H3C1/H4C2/H2AC4/H2AC14/H4C1/H2BC14/H3C7/H4C3/H3C11/H4C4/H2BC10/H2BC3/H4C13/H4C6
REACTOME_AMYLOID_FIBER_FORMATION	REACTOME_AMYLOID_FIBER_FORMATION	107	-0.657726	-1.4849	0.000999001	0.044773	0.0379447	5318	tags=34%, list=15%, signal=29%	H2AC8/H2BC8/H4C8/H3C4/H3C8/H2BC11/H2BU1/H2BC1/H4C11/H2AC20/H2AC7/H4-16/H2BC17/H3C13/H2BC9/H3C12/SEMG1/H2BC13/H2BC7/H2BC6/H4C5/H3C1/H4C2/H2AC4/H2AC14/CALB1/H4C1/H2BC14/H3C7/H4C3/H3C11/H4C4/H2BC10/H2BC3/H4C13/H4C6
REACTOME_B_WICH_COMPLEX_POSITIVELY_REGULATES_RRNA_EXPRESSION	REACTOME_B_WICH_COMPLEX_POSITIVELY_REGULATES_RRNA_EXPRESSION	89	-0.707333	-1.59024	0.000999001	0.044773	0.0379447	5318	tags=38%, list=15%, signal=33%	H2AC8/H2BC8/H4C8/H3C4/H3C8/H2BC11/H2BU1/H2BC1/H4C11/H2AC20/H2AC7/H4-16/H2BC17/H3C13/H2BC9/H3C12/H2BC13/H2BC7/H2BC6/H4C5/H3C1/H4C2/H2AC4/H2AC14/H4C1/H2BC14/H3C7/H4C3/H3C11/H4C4/H2BC10/H2BC3/H4C13/H4C6
REACTOME_BASE_EXCISION_REPAIR	REACTOME_BASE_EXCISION_REPAIR	90	-0.65441	-1.47056	0.000999001	0.044773	0.0379447	5318	tags=31%, list=15%, signal=27%	H2AC8/H2BC8/H4C8/H2BC11/H2BU1/H2BC1/H4C11/H3-4/H2AC20/H2AC7/H4-16/H2BC17/H2BC9/H2BC13/H2BC7/H2BC6/H4C5/H4C2/H2AC4/H2AC14/H4C1/H2BC14/H4C3/H4C4/H2BC10/H2BC3/H4C13/H4C6
REACTOME_CELLULAR_SENESCENCE	REACTOME_CELLULAR_SENESCENCE	194	-0.579063	-1.33248	0.000999001	0.044773	0.0379447	5318	tags=20%, list=15%, signal=17%	H2AC8/H2BC8/H4C8/H3C4/H3C8/H2BC11/H2BU1/H2BC1/H4C11/H3-4/H2AC20/H2AC7/H4-16/H2BC17/H3C13/H2BC9/H3C12/H2BC13/H2BC7/H2BC6/H4C5/H1-4/H3C1/H1-3/H4C2/H2AC4/H2AC14/H4C1/H2BC14/H3C7/H4C3/H1-5/H3C11/H4C4/H2BC10/H2BC3/H1-1/H4C13/H4C6
REACTOME_EPIGENETIC_REGULATION_OF_GENE_EXPRESSION	REACTOME_EPIGENETIC_REGULATION_OF_GENE_EXPRESSION	146	-0.625978	-1.43153	0.000999001	0.044773	0.0379447	5318	tags=23%, list=15%, signal=20%	H2AC8/H2BC8/H4C8/H3C4/H3C8/H2BC11/H2BU1/H2BC1/H4C11/H2AC20/H2AC7/H4-16/H2BC17/H3C13/H2BC9/H3C12/H2BC13/H2BC7/H2BC6/H4C5/H3C1/H4C2/H2AC4/H2AC14/H4C1/H2BC14/H3C7/H4C3/H3C11/H4C4/H2BC10/H2BC3/H4C13/H4C6
REACTOME_ESTROGEN_DEPENDENT_GENE_EXPRESSION	REACTOME_ESTROGEN_DEPENDENT_GENE_EXPRESSION	148	-0.605999	-1.38707	0.000999001	0.044773	0.0379447	5318	tags=24%, list=15%, signal=20%	H2AC8/H2BC8/H4C8/H3C4/H3C8/H2BC11/H2BU1/H2BC1/H4C11/TFF1/H2AC20/H2AC7/H4-16/H2BC17/H3C13/H2BC9/H3C12/H2BC13/H2BC7/H2BC6/H4C5/H3C1/H4C2/H2AC4/H2AC14/H4C1/H2BC14/H3C7/H4C3/H3C11/H4C4/H2BC10/H2BC3/H4C13/H4C6
REACTOME_FORMATION_OF_THE_BETA_CATENIN_TCF_TRANSACTIVATING_COMPLEX	REACTOME_FORMATION_OF_THE_BETA_CATENIN_TCF_TRANSACTIVATING_COMPLEX	90	-0.726956	-1.63359	0.000999001	0.044773	0.0379447	5318	tags=39%, list=15%, signal=33%	H2AC8/H2BC8/H4C8/H3C4/H3C8/H2BC11/H2BU1/H2BC1/H4C11/H3-4/H2AC20/H2AC7/H4-16/H2BC17/H3C13/H2BC9/H3C12/H2BC13/H2BC7/H2BC6/H4C5/H3C1/H4C2/H2AC4/H2AC14/H4C1/H2BC14/H3C7/H4C3/H3C11/H4C4/H2BC10/H2BC3/H4C13/H4C6
REACTOME_GENE_SILENCING_BY_RNA	REACTOME_GENE_SILENCING_BY_RNA	136	-0.617022	-1.40655	0.000999001	0.044773	0.0379447	5318	tags=26%, list=15%, signal=23%	H2AC8/H2BC8/H4C8/H3C4/H3C8/H2BC11/H2BU1/H2BC1/MOV10L1/H4C11/H2AC20/H2AC7/H4-16/H2BC17/H3C13/H2BC9/H3C12/PIWIL1/H2BC13/H2BC7/H2BC6/H4C5/H3C1/H4C2/H2AC4/H2AC14/H4C1/H2BC14/H3C7/H4C3/H3C11/H4C4/H2BC10/H2BC3/H4C13/H4C6
REACTOME_HATS_ACETYLATE_HISTONES	REACTOME_HATS_ACETYLATE_HISTONES	139	-0.683769	-1.56147	0.000999001	0.044773	0.0379447	5318	tags=29%, list=15%, signal=25%	H2AC8/H2BC8/H4C8/H2AC11/H3C4/H3C8/H2BC11/H2BU1/H2AC13/H2BC1/H4C11/H2AC20/H2AC7/H2BC18/H4-16/H2BC17/H2AC17/H3C13/H2BC9/H3C12/H2BC13/H2BC7/H2AC16/H2BC6/H4C5/H3C1/H4C2/H2AC4/H2AC12/H2AC14/H2AC21/H4C1/H2BC14/H3C7/H4C3/H3C11/H4C4/H2BC10/H2BC3/H4C13/H4C6
REACTOME_HCMV_EARLY_EVENTS	REACTOME_HCMV_EARLY_EVENTS	135	-0.66925	-1.52494	0.000999001	0.044773	0.0379447	5318	tags=31%, list=15%, signal=27%	H2AC8/H2BC8/H4C8/H2AC11/H3C4/H3C8/H2BC11/H2BU1/H2AC13/H2BC1/H4C11/H2AC20/TUBA4B/H2AC7/H2BC18/H4-16/H2BC17/H2AC17/H3C13/H2BC9/H3C12/H2BC13/H2BC7/H2AC16/H2BC6/H4C5/H3C1/H4C2/H2AC4/H2AC12/H2AC14/H2AC21/H4C1/H2BC14/H3C7/H4C3/H3C11/H4C4/H2BC10/H2BC3/H4C13/H4C6
REACTOME_HCMV_INFECTION	REACTOME_HCMV_INFECTION	159	-0.64073	-1.46815	0.000999001	0.044773	0.0379447	5318	tags=26%, list=15%, signal=23%	H2AC8/H2BC8/H4C8/H2AC11/H3C4/H3C8/H2BC11/H2BU1/H2AC13/H2BC1/H4C11/H2AC20/TUBA4B/H2AC7/H2BC18/H4-16/H2BC17/H2AC17/H3C13/H2BC9/H3C12/H2BC13/H2BC7/H2AC16/H2BC6/H4C5/H3C1/H4C2/H2AC4/H2AC12/H2AC14/H2AC21/H4C1/H2BC14/H3C7/H4C3/H3C11/H4C4/H2BC10/H2BC3/H4C13/H4C6
REACTOME_HCMV_LATE_EVENTS	REACTOME_HCMV_LATE_EVENTS	113	-0.721869	-1.63351	0.000999001	0.044773	0.0379447	5318	tags=36%, list=15%, signal=31%	H2AC8/H2BC8/H4C8/H2AC11/H3C4/H3C8/H2BC11/H2BU1/H2AC13/H2BC1/H4C11/H2AC20/H2AC7/H2BC18/H4-16/H2BC17/H2AC17/H3C13/H2BC9/H3C12/H2BC13/H2BC7/H2AC16/H2BC6/H4C5/H3C1/H4C2/H2AC4/H2AC12/H2AC14/H2AC21/H4C1/H2BC14/H3C7/H4C3/H3C11/H4C4/H2BC10/H2BC3/H4C13/H4C6
REACTOME_HDACS_DEACETYLATE_HISTONES	REACTOME_HDACS_DEACETYLATE_HISTONES	91	-0.756727	-1.70158	0.000999001	0.044773	0.0379447	5318	tags=45%, list=15%, signal=39%	H2AC8/H2BC8/H4C8/H2AC11/H3C4/H3C8/H2BC11/H2BU1/H2AC13/H2BC1/H4C11/H2AC20/H2AC7/H2BC18/H4-16/H2BC17/H2AC17/H3C13/H2BC9/H3C12/H2BC13/H2BC7/H2AC16/H2BC6/H4C5/H3C1/H4C2/H2AC4/H2AC12/H2AC14/H2AC21/H4C1/H2BC14/H3C7/H4C3/H3C11/H4C4/H2BC10/H2BC3/H4C13/H4C6
REACTOME_MEIOSIS	REACTOME_MEIOSIS	117	-0.637827	-1.44604	0.000999001	0.044773	0.0379447	5318	tags=32%, list=15%, signal=28%	H2AC8/H2BC8/H4C8/H3C4/H3C8/H2BC11/SYCP1/STAG3/H2BU1/H2BC1/H4C11/H3-4/H2AC20/H2AC7/H4-16/H2BC17/H3C13/H2BC9/H3C12/SYCP3/H2BC13/H2BC7/H2BC6/H4C5/H3C1/H4C2/H2AC4/H2AC14/H4C1/H2BC14/H3C7/H4C3/H3C11/H4C4/H2BC10/H2BC3/H4C13/H4C6
REACTOME_MITOTIC_PROPHASE	REACTOME_MITOTIC_PROPHASE	141	-0.631415	-1.44278	0.000999001	0.044773	0.0379447	5318	tags=25%, list=15%, signal=21%	H2AC8/H2BC8/H4C8/H3C4/H3C8/H2BC11/H2BU1/H2BC1/H4C11/H3-4/H2AC20/H2AC7/H4-16/H2BC17/H3C13/H2BC9/H3C12/H2BC13/H2BC7/H2BC6/H4C5/H3C1/H4C2/H2AC4/H2AC14/H4C1/H2BC14/H3C7/H4C3/H3C11/H4C4/H2BC10/H2BC3/H4C13/H4C6
REACTOME_NEGATIVE_EPIGENETIC_REGULATION_OF_RRNA_EXPRESSION	REACTOME_NEGATIVE_EPIGENETIC_REGULATION_OF_RRNA_EXPRESSION	107	-0.681424	-1.5384	0.000999001	0.044773	0.0379447	5318	tags=32%, list=15%, signal=27%	H2AC8/H2BC8/H4C8/H3C4/H3C8/H2BC11/H2BU1/H2BC1/H4C11/H2AC20/H2AC7/H4-16/H2BC17/H3C13/H2BC9/H3C12/H2BC13/H2BC7/H2BC6/H4C5/H3C1/H4C2/H2AC4/H2AC14/H4C1/H2BC14/H3C7/H4C3/H3C11/H4C4/H2BC10/H2BC3/H4C13/H4C6
REACTOME_OXIDATIVE_STRESS_INDUCED_SENESCENCE	REACTOME_OXIDATIVE_STRESS_INDUCED_SENESCENCE	122	-0.655402	-1.48966	0.000999001	0.044773	0.0379447	5318	tags=28%, list=15%, signal=24%	H2AC8/H2BC8/H4C8/H3C4/H3C8/H2BC11/H2BU1/H2BC1/H4C11/H2AC20/H2AC7/H4-16/H2BC17/H3C13/H2BC9/H3C12/H2BC13/H2BC7/H2BC6/H4C5/H3C1/H4C2/H2AC4/H2AC14/H4C1/H2BC14/H3C7/H4C3/H3C11/H4C4/H2BC10/H2BC3/H4C13/H4C6
REACTOME_POSITIVE_EPIGENETIC_REGULATION_OF_RRNA_EXPRESSION	REACTOME_POSITIVE_EPIGENETIC_REGULATION_OF_RRNA_EXPRESSION	104	-0.685318	-1.54528	0.000999001	0.044773	0.0379447	5318	tags=33%, list=15%, signal=28%	H2AC8/H2BC8/H4C8/H3C4/H3C8/H2BC11/H2BU1/H2BC1/H4C11/H2AC20/H2AC7/H4-16/H2BC17/H3C13/H2BC9/H3C12/H2BC13/H2BC7/H2BC6/H4C5/H3C1/H4C2/H2AC4/H2AC14/H4C1/H2BC14/H3C7/H4C3/H3C11/H4C4/H2BC10/H2BC3/H4C13/H4C6
REACTOME_PRE_NOTCH_EXPRESSION_AND_PROCESSING	REACTOME_PRE_NOTCH_EXPRESSION_AND_PROCESSING	118	-0.678845	-1.53983	0.000999001	0.044773	0.0379447	5318	tags=32%, list=15%, signal=28%	H2AC8/H2BC8/H4C8/MIR302A/H3C4/H3C8/H2BC11/H2BU1/MIR200B/H2BC1/H4C11/H2AC20/H2AC7/H4-16/MIR34C/H2BC17/H3C13/H2BC9/H3C12/MIR34B/H2BC13/H2BC7/H2BC6/H4C5/H3C1/H4C2/H2AC4/H2AC14/H4C1/H2BC14/H3C7/H4C3/H3C11/H4C4/H2BC10/H2BC3/H4C13/H4C6
REACTOME_RHO_GTPASES_ACTIVATE_PKNS	REACTOME_RHO_GTPASES_ACTIVATE_PKNS	92	-0.689454	-1.55062	0.000999001	0.044773	0.0379447	5318	tags=37%, list=15%, signal=32%	H2AC8/H2BC8/H4C8/H3C4/H3C8/H2BC11/H2BU1/H2BC1/H4C11/H2AC20/H2AC7/H4-16/H2BC17/H3C13/H2BC9/H3C12/H2BC13/H2BC7/H2BC6/H4C5/H3C1/H4C2/H2AC4/H2AC14/H4C1/H2BC14/H3C7/H4C3/H3C11/H4C4/H2BC10/H2BC3/H4C13/H4C6
REACTOME_RNA_POLYMERASE_I_PROMOTER_ESCAPE	REACTOME_RNA_POLYMERASE_I_PROMOTER_ESCAPE	89	-0.70064	-1.57519	0.000999001	0.044773	0.0379447	5318	tags=38%, list=15%, signal=33%	H2AC8/H2BC8/H4C8/H3C4/H3C8/H2BC11/H2BU1/H2BC1/H4C11/H2AC20/H2AC7/H4-16/H2BC17/H3C13/H2BC9/H3C12/H2BC13/H2BC7/H2BC6/H4C5/H3C1/H4C2/H2AC4/H2AC14/H4C1/H2BC14/H3C7/H4C3/H3C11/H4C4/H2BC10/H2BC3/H4C13/H4C6
REACTOME_RNA_POLYMERASE_I_TRANSCRIPTION	REACTOME_RNA_POLYMERASE_I_TRANSCRIPTION	109	-0.67767	-1.5306	0.000999001	0.044773	0.0379447	5318	tags=31%, list=15%, signal=27%	H2AC8/H2BC8/H4C8/H3C4/H3C8/H2BC11/H2BU1/H2BC1/H4C11/H2AC20/H2AC7/H4-16/H2BC17/H3C13/H2BC9/H3C12/H2BC13/H2BC7/H2BC6/H4C5/H3C1/H4C2/H2AC4/H2AC14/H4C1/H2BC14/H3C7/H4C3/H3C11/H4C4/H2BC10/H2BC3/H4C13/H4C6
REACTOME_RUNX1_REGULATES_GENES_INVOLVED_IN_MEGAKARYOCYTE_DIFFERENTIATION_AND_PLATELET_FUNCTION	REACTOME_RUNX1_REGULATES_GENES_INVOLVED_IN_MEGAKARYOCYTE_DIFFERENTIATION_AND_PLATELET_FUNCTION	96	-0.6811	-1.53244	0.000999001	0.044773	0.0379447	5318	tags=35%, list=15%, signal=30%	H2AC8/H2BC8/H4C8/H3C4/H3C8/H2BC11/H2BU1/H2BC1/H4C11/H2AC20/H2AC7/H4-16/H2BC17/H3C13/H2BC9/H3C12/H2BC13/H2BC7/H2BC6/H4C5/H3C1/H4C2/H2AC4/H2AC14/H4C1/H2BC14/H3C7/H4C3/H3C11/H4C4/H2BC10/H2BC3/H4C13/H4C6
REACTOME_RUNX1_REGULATES_TRANSCRIPTION_OF_GENES_INVOLVED_IN_DIFFERENTIATION_OF_HSCS	REACTOME_RUNX1_REGULATES_TRANSCRIPTION_OF_GENES_INVOLVED_IN_DIFFERENTIATION_OF_HSCS	128	-0.608243	-1.38576	0.000999001	0.044773	0.0379447	5318	tags=27%, list=15%, signal=23%	H2AC8/H2BC8/H4C8/H3C4/H3C8/H2BC11/H2BU1/H2BC1/H4C11/H2AC20/H2AC7/H4-16/H2BC17/H3C13/H2BC9/H3C12/H2BC13/H2BC7/H2BC6/H4C5/H3C1/H4C2/H2AC4/H2AC14/H4C1/H2BC14/H3C7/H4C3/H3C11/H4C4/H2BC10/H2BC3/H4C13/H4C6
REACTOME_SENESCENCE_ASSOCIATED_SECRETORY_PHENOTYPE_SASP_	REACTOME_SENESCENCE_ASSOCIATED_SECRETORY_PHENOTYPE_SASP_	110	-0.670709	-1.5151	0.000999001	0.044773	0.0379447	5318	tags=31%, list=15%, signal=26%	H2AC8/H2BC8/H4C8/H3C4/H3C8/H2BC11/H2BU1/H2BC1/H4C11/H2AC20/H2AC7/H4-16/H2BC17/H3C13/H2BC9/H3C12/H2BC13/H2BC7/H2BC6/H4C5/H3C1/H4C2/H2AC4/H2AC14/H4C1/H2BC14/H3C7/H4C3/H3C11/H4C4/H2BC10/H2BC3/H4C13/H4C6
REACTOME_TRANSCRIPTIONAL_REGULATION_BY_SMALL_RNAS	REACTOME_TRANSCRIPTIONAL_REGULATION_BY_SMALL_RNAS	105	-0.685009	-1.54472	0.000999001	0.044773	0.0379447	5318	tags=32%, list=15%, signal=28%	H2AC8/H2BC8/H4C8/H3C4/H3C8/H2BC11/H2BU1/H2BC1/H4C11/H2AC20/H2AC7/H4-16/H2BC17/H3C13/H2BC9/H3C12/H2BC13/H2BC7/H2BC6/H4C5/H3C1/H4C2/H2AC4/H2AC14/H4C1/H2BC14/H3C7/H4C3/H3C11/H4C4/H2BC10/H2BC3/H4C13/H4C6
REACTOME_TRANSCRIPTIONAL_REGULATION_OF_GRANULOPOIESIS	REACTOME_TRANSCRIPTIONAL_REGULATION_OF_GRANULOPOIESIS	88	-0.718337	-1.61524	0.000999001	0.044773	0.0379447	5318	tags=39%, list=15%, signal=33%	H2AC8/H2BC8/H4C8/H3C4/H3C8/H2BC11/H2BU1/H2BC1/H4C11/H2AC20/H2AC7/H4-16/H2BC17/H3C13/H2BC9/H3C12/H2BC13/H2BC7/H2BC6/H4C5/H3C1/H4C2/H2AC4/H2AC14/H4C1/H2BC14/H3C7/H4C3/H3C11/H4C4/H2BC10/H2BC3/H4C13/H4C6
REACTOME_MEIOTIC_RECOMBINATION	REACTOME_MEIOTIC_RECOMBINATION	85	-0.685942	-1.53764	0.001	0.044773	0.0379447	5318	tags=41%, list=15%, signal=35%	H2AC8/H2BC8/H4C8/H3C4/H3C8/H2BC11/H2BU1/H2BC1/H4C11/H3-4/H2AC20/H2AC7/H4-16/H2BC17/H3C13/H2BC9/H3C12/H2BC13/H2BC7/H2BC6/H4C5/H3C1/H4C2/H2AC4/H2AC14/H4C1/H2BC14/H3C7/H4C3/H3C11/H4C4/H2BC10/H2BC3/H4C13/H4C6
REACTOME_ACTIVATED_PKN1_STIMULATES_TRANSCRIPTION_OF_AR_ANDROGEN_RECEPTOR_REGULATED_GENES_KLK2_AND_KLK3	REACTOME_ACTIVATED_PKN1_STIMULATES_TRANSCRIPTION_OF_AR_ANDROGEN_RECEPTOR_REGULATED_GENES_KLK2_AND_KLK3	65	-0.756561	-1.67814	0.001001	0.044773	0.0379447	5318	tags=52%, list=15%, signal=45%	H2AC8/H2BC8/H4C8/H3C4/H3C8/H2BC11/H2BU1/H2BC1/H4C11/H2AC20/H2AC7/H4-16/H2BC17/H3C13/H2BC9/H3C12/H2BC13/H2BC7/H2BC6/H4C5/H3C1/H4C2/H2AC4/H2AC14/H4C1/H2BC14/H3C7/H4C3/H3C11/H4C4/H2BC10/H2BC3/H4C13/H4C6
REACTOME_BASE_EXCISION_REPAIR_AP_SITE_FORMATION	REACTOME_BASE_EXCISION_REPAIR_AP_SITE_FORMATION	63	-0.739425	-1.63791	0.001001	0.044773	0.0379447	5318	tags=44%, list=15%, signal=38%	H2AC8/H2BC8/H4C8/H2BC11/H2BU1/H2BC1/H4C11/H3-4/H2AC20/H2AC7/H4-16/H2BC17/H2BC9/H2BC13/H2BC7/H2BC6/H4C5/H4C2/H2AC4/H2AC14/H4C1/H2BC14/H4C3/H4C4/H2BC10/H2BC3/H4C13/H4C6
REACTOME_DNA_DAMAGE_TELOMERE_STRESS_INDUCED_SENESCENCE	REACTOME_DNA_DAMAGE_TELOMERE_STRESS_INDUCED_SENESCENCE	80	-0.705866	-1.57992	0.001001	0.044773	0.0379447	5318	tags=40%, list=15%, signal=34%	H2AC8/H2BC8/H4C8/H2BC11/H2BU1/H2BC1/H4C11/H3-4/H2AC20/H2AC7/H4-16/H2BC17/H2BC9/H2BC13/H2BC7/H2BC6/H4C5/H1-4/H1-3/H4C2/H2AC4/H2AC14/H4C1/H2BC14/H4C3/H1-5/H4C4/H2BC10/H2BC3/H1-1/H4C13/H4C6
REACTOME_DNA_DOUBLE_STRAND_BREAK_RESPONSE	REACTOME_DNA_DOUBLE_STRAND_BREAK_RESPONSE	77	-0.671365	-1.50155	0.001001	0.044773	0.0379447	5227	tags=30%, list=14%, signal=26%	H2BC8/H4C8/H2BC11/H2BU1/H2BC1/H4C11/H3-4/H4-16/H2BC17/H2BC9/H2BC13/H2BC7/H2BC6/H4C5/H4C2/H4C1/H2BC14/H4C3/H4C4/H2BC10/H2BC3/H4C13/H4C6
REACTOME_DNA_METHYLATION	REACTOME_DNA_METHYLATION	63	-0.770498	-1.70674	0.001001	0.044773	0.0379447	5318	tags=54%, list=15%, signal=46%	H2AC8/H2BC8/H4C8/H3C4/H3C8/H2BC11/H2BU1/H2BC1/H4C11/H2AC20/H2AC7/H4-16/H2BC17/H3C13/H2BC9/H3C12/H2BC13/H2BC7/H2BC6/H4C5/H3C1/H4C2/H2AC4/H2AC14/H4C1/H2BC14/H3C7/H4C3/H3C11/H4C4/H2BC10/H2BC3/H4C13/H4C6
REACTOME_ERCC6_CSB_AND_EHMT2_G9A_POSITIVELY_REGULATE_RRNA_EXPRESSION	REACTOME_ERCC6_CSB_AND_EHMT2_G9A_POSITIVELY_REGULATE_RRNA_EXPRESSION	74	-0.753021	-1.68153	0.001001	0.044773	0.0379447	5318	tags=46%, list=15%, signal=39%	H2AC8/H2BC8/H4C8/H3C4/H3C8/H2BC11/H2BU1/H2BC1/H4C11/H2AC20/H2AC7/H4-16/H2BC17/H3C13/H2BC9/H3C12/H2BC13/H2BC7/H2BC6/H4C5/H3C1/H4C2/H2AC4/H2AC14/H4C1/H2BC14/H3C7/H4C3/H3C11/H4C4/H2BC10/H2BC3/H4C13/H4C6
REACTOME_RECOGNITION_AND_ASSOCIATION_OF_DNA_GLYCOSYLASE_WITH_SITE_CONTAINING_AN_AFFECTED_PURINE	REACTOME_RECOGNITION_AND_ASSOCIATION_OF_DNA_GLYCOSYLASE_WITH_SITE_CONTAINING_AN_AFFECTED_PURINE	56	-0.761609	-1.6782	0.001001	0.044773	0.0379447	5318	tags=50%, list=15%, signal=43%	H2AC8/H2BC8/H4C8/H2BC11/H2BU1/H2BC1/H4C11/H3-4/H2AC20/H2AC7/H4-16/H2BC17/H2BC9/H2BC13/H2BC7/H2BC6/H4C5/H4C2/H2AC4/H2AC14/H4C1/H2BC14/H4C3/H4C4/H2BC10/H2BC3/H4C13/H4C6
REACTOME_RMTS_METHYLATE_HISTONE_ARGININES	REACTOME_RMTS_METHYLATE_HISTONE_ARGININES	76	-0.711351	-1.59101	0.001001	0.044773	0.0379447	5318	tags=37%, list=15%, signal=32%	H2AC8/H4C8/H2AC11/H3C4/H3C8/H2AC13/H4C11/H2AC20/H2AC7/H4-16/H2AC17/H3C13/H3C12/H2AC16/H4C5/H3C1/H4C2/H2AC4/H2AC12/H2AC14/H2AC21/H4C1/H3C7/H4C3/H3C11/H4C4/H4C13/H4C6
REACTOME_SIRT1_NEGATIVELY_REGULATES_RRNA_EXPRESSION	REACTOME_SIRT1_NEGATIVELY_REGULATES_RRNA_EXPRESSION	66	-0.76474	-1.69948	0.001001	0.044773	0.0379447	5318	tags=52%, list=15%, signal=44%	H2AC8/H2BC8/H4C8/H3C4/H3C8/H2BC11/H2BU1/H2BC1/H4C11/H2AC20/H2AC7/H4-16/H2BC17/H3C13/H2BC9/H3C12/H2BC13/H2BC7/H2BC6/H4C5/H3C1/H4C2/H2AC4/H2AC14/H4C1/H2BC14/H3C7/H4C3/H3C11/H4C4/H2BC10/H2BC3/H4C13/H4C6
WP_HISTONE_MODIFICATIONS	WP_HISTONE_MODIFICATIONS	65	-0.669492	-1.48501	0.001001	0.044773	0.0379447	5211	tags=26%, list=14%, signal=22%	H4C8/H3C4/H3C8/H4C11/H4-16/H3C13/H3C12/H4C5/H3C1/H4C2/H4C1/H3C7/H4C3/H3C11/H4C4/H4C13/H4C6
REACTOME_CONDENSATION_OF_PROPHASE_CHROMOSOMES	REACTOME_CONDENSATION_OF_PROPHASE_CHROMOSOMES	72	-0.738008	-1.64451	0.001002	0.044773	0.0379447	5318	tags=49%, list=15%, signal=42%	H2AC8/H2BC8/H4C8/H3C4/H3C8/H2BC11/H2BU1/H2BC1/H4C11/H3-4/H2AC20/H2AC7/H4-16/H2BC17/H3C13/H2BC9/H3C12/H2BC13/H2BC7/H2BC6/H4C5/H3C1/H4C2/H2AC4/H2AC14/H4C1/H2BC14/H3C7/H4C3/H3C11/H4C4/H2BC10/H2BC3/H4C13/H4C6
REACTOME_DEPOSITION_OF_NEW_CENPA_CONTAINING_NUCLEOSOMES_AT_THE_CENTROMERE	REACTOME_DEPOSITION_OF_NEW_CENPA_CONTAINING_NUCLEOSOMES_AT_THE_CENTROMERE	72	-0.668754	-1.49019	0.001002	0.044773	0.0379447	5318	tags=38%, list=15%, signal=32%	H2AC8/H2BC8/H4C8/H2BC11/H2BU1/H2BC1/H4C11/H2AC20/H2AC7/H4-16/H2BC17/H2BC9/H2BC13/H2BC7/H2BC6/H4C5/H4C2/H2AC4/H2AC14/H4C1/H2BC14/H4C3/H4C4/H2BC10/H2BC3/H4C13/H4C6
REACTOME_FCGR_ACTIVATION	REACTOME_FCGR_ACTIVATION	69	-0.656589	-1.46108	0.001002	0.044773	0.0379447	10454	tags=78%, list=29%, signal=56%	IGLV2-8/IGLC2/IGHV1-46/FGR/IGKV3-15/IGKV1-39/IGHV3-11/IGKV1D-39/IGHV3-23/IGHG2/IGLV1-44/IGLV3-21/IGHV3-53/IGLV1-40/IGLV2-11/IGKV3-20/IGLV7-43/IGKV3D-20/IGKV1-12/IGLV1-47/IGLC3/IGKV2-30/IGKV3-11/IGHV4-39/IGKV1D-12/IGHG4/IGLV2-23/IGHV3-33/IGHV1-2/IGLV3-25/IGLV6-57/IGLV3-19/IGHV3-30/IGHV4-34/IGHG1/IGKV1-33/IGKV1D-16/IGLV3-1/IGHV1-69/IGKV1D-33/IGKV2-28/IGHV3-7/IGKV1-16/IGHV2-5/IGHV3-48/IGKV2D-28/IGHV…
REACTOME_INHIBITION_OF_DNA_RECOMBINATION_AT_TELOMERE	REACTOME_INHIBITION_OF_DNA_RECOMBINATION_AT_TELOMERE	68	-0.729214	-1.62208	0.001002	0.044773	0.0379447	5318	tags=41%, list=15%, signal=35%	H2AC8/H2BC8/H4C8/H2BC11/H2BU1/H2BC1/H4C11/H3-4/H2AC20/H2AC7/H4-16/H2BC17/H2BC9/H2BC13/H2BC7/H2BC6/H4C5/H4C2/H2AC4/H2AC14/H4C1/H2BC14/H4C3/H4C4/H2BC10/H2BC3/H4C13/H4C6
REACTOME_MEIOTIC_SYNAPSIS	REACTOME_MEIOTIC_SYNAPSIS	79	-0.710005	-1.5866	0.001002	0.044773	0.0379447	5318	tags=39%, list=15%, signal=34%	H2AC8/H2BC8/H4C8/H2BC11/SYCP1/STAG3/H2BU1/H2BC1/H4C11/H3-4/H2AC20/H2AC7/H4-16/H2BC17/H2BC9/SYCP3/H2BC13/H2BC7/H2BC6/H4C5/H4C2/H2AC4/H2AC14/H4C1/H2BC14/H4C3/H4C4/H2BC10/H2BC3/H4C13/H4C6
REACTOME_NONHOMOLOGOUS_END_JOINING_NHEJ_	REACTOME_NONHOMOLOGOUS_END_JOINING_NHEJ_	69	-0.698349	-1.554	0.001002	0.044773	0.0379447	5227	tags=33%, list=14%, signal=29%	H2BC8/H4C8/H2BC11/H2BU1/H2BC1/H4C11/H3-4/H4-16/H2BC17/H2BC9/H2BC13/H2BC7/H2BC6/H4C5/H4C2/H4C1/H2BC14/H4C3/H4C4/H2BC10/H2BC3/H4C13/H4C6
REACTOME_PRC2_METHYLATES_HISTONES_AND_DNA	REACTOME_PRC2_METHYLATES_HISTONES_AND_DNA	71	-0.763206	-1.69923	0.001002	0.044773	0.0379447	5318	tags=48%, list=15%, signal=41%	H2AC8/H2BC8/H4C8/H3C4/H3C8/H2BC11/H2BU1/H2BC1/H4C11/H2AC20/H2AC7/H4-16/H2BC17/H3C13/H2BC9/H3C12/H2BC13/H2BC7/H2BC6/H4C5/H3C1/H4C2/H2AC4/H2AC14/H4C1/H2BC14/H3C7/H4C3/H3C11/H4C4/H2BC10/H2BC3/H4C13/H4C6
REACTOME_HDMS_DEMETHYLATE_HISTONES	REACTOME_HDMS_DEMETHYLATE_HISTONES	48	-0.744442	-1.62026	0.00100806	0.044773	0.0379447	5211	tags=35%, list=14%, signal=30%	H4C8/H3C4/H3C8/H4C11/H4-16/H3C13/H3C12/H4C5/H3C1/H4C2/H4C1/H3C7/H4C3/H3C11/H4C4/H4C13/H4C6
REACTOME_CLASS_C_3_METABOTROPIC_GLUTAMATE_PHEROMONE_RECEPTORS_	REACTOME_CLASS_C_3_METABOTROPIC_GLUTAMATE_PHEROMONE_RECEPTORS_	39	-0.745683	-1.60351	0.00102041	0.044773	0.0379447	7537	tags=74%, list=21%, signal=59%	GRM3/TAS2R5/GPRC6A/GABBR1/TAS2R14/GRM2/CASR/TAS2R40/GRM6/TAS2R20/GRM5/TAS1R1/TAS2R38/TAS2R10/TAS2R4/TAS2R8/TAS2R31/GRM7/TAS2R39/TAS2R19/TAS2R42/TAS2R60/TAS2R3/TAS2R41/TAS2R43/TAS2R50/TAS2R13/TAS2R46/TAS2R30
REACTOME_REPRODUCTION	REACTOME_REPRODUCTION	143	-0.595871	-1.36188	0.001998	0.082858	0.0702214	5318	tags=28%, list=15%, signal=24%	H2AC8/H2BC8/H4C8/H3C4/H3C8/H2BC11/SYCP1/STAG3/H2BU1/H2BC1/IZUMO1/H4C11/H3-4/H2AC20/H2AC7/H4-16/H2BC17/H3C13/H2BC9/H3C12/SYCP3/H2BC13/H2BC7/H2BC6/H4C5/H3C1/ADAM20/H4C2/H2AC4/H2AC14/H4C1/H2BC14/H3C7/H4C3/H3C11/H4C4/H2BC10/H2BC3/H4C13/H4C6
REACTOME_CD22_MEDIATED_BCR_REGULATION	REACTOME_CD22_MEDIATED_BCR_REGULATION	61	-0.669698	-1.48131	0.002002	0.082858	0.0702214	10833	tags=90%, list=30%, signal=64%	IGKV4-1/IGHD/IGLV2-8/IGLC2/CD79A/IGHV1-46/IGKV3-15/IGKV1-39/IGHV3-11/IGKV1D-39/IGHV3-23/IGLV1-44/IGLV3-21/IGHV3-53/IGLV1-40/IGLV2-11/IGKV3-20/CD22/IGLV7-43/IGKV3D-20/IGKV1-12/IGLV1-47/IGLC3/IGKV2-30/IGKV3-11/IGHV4-39/IGKV1D-12/IGLV2-23/IGHV3-33/IGHV1-2/IGLV3-25/IGLV6-57/IGLV3-19/IGHV3-30/IGHV4-34/IGKV1-33/IGKV1D-16/IGLV3-1/IGHV1-69/IGKV1D-33/IGKV2-28/IGHV3-7/IGKV1-16/IGHV2-5/IGHV3-48/IGHM/IGKV2D-…
REACTOME_CREATION_OF_C4_AND_C2_ACTIVATORS	REACTOME_CREATION_OF_C4_AND_C2_ACTIVATORS	71	-0.636739	-1.41766	0.00200401	0.082858	0.0702214	10454	tags=77%, list=29%, signal=55%	IGLV2-8/IGLC2/IGHV1-46/IGKV3-15/IGKV1-39/FCN3/IGHV3-11/IGKV1D-39/IGHV3-23/IGHG2/IGLV1-44/IGLV3-21/IGHV3-53/IGLV1-40/IGLV2-11/IGKV3-20/IGLV7-43/IGKV3D-20/IGKV1-12/IGLV1-47/IGLC3/IGKV2-30/IGKV3-11/IGHV4-39/IGKV1D-12/IGHG4/IGLV2-23/IGHV3-33/IGHV1-2/IGLV3-25/IGLV6-57/IGLV3-19/IGHV3-30/IGHV4-34/IGHG1/MASP2/IGKV1-33/IGKV1D-16/IGLV3-1/IGHV1-69/IGKV1D-33/IGKV2-28/IGHV3-7/IGKV1-16/IGHV2-5/IGHV3-48/IGKV2D-…
REACTOME_APOPTOSIS_INDUCED_DNA_FRAGMENTATION	REACTOME_APOPTOSIS_INDUCED_DNA_FRAGMENTATION	13	-0.824414	-1.59693	0.00227015	0.0920909	0.0780462	1723	tags=31%, list=5%, signal=29%	H1-4/H1-3/H1-5/H1-1
REACTOME_PKMTS_METHYLATE_HISTONE_LYSINES	REACTOME_PKMTS_METHYLATE_HISTONE_LYSINES	69	-0.641243	-1.42693	0.00300601	0.117981	0.0999875	5211	tags=25%, list=14%, signal=21%	H4C8/H3C4/H3C8/H4C11/H4-16/H3C13/H3C12/H4C5/H3C1/H4C2/H4C1/H3C7/H4C3/H3C11/H4C4/H4C13/H4C6
KEGG_TASTE_TRANSDUCTION	KEGG_TASTE_TRANSDUCTION	51	-0.65961	-1.44332	0.00301811	0.117981	0.0999875	7690	tags=51%, list=21%, signal=40%	ADCY4/PLCB2/TAS2R5/ADCY8/TAS2R14/GNB3/CACNA1A/TAS2R40/TAS2R20/TAS1R1/TAS2R38/TAS2R10/TAS2R4/GNAT3/TAS2R8/TAS2R31/TAS2R39/TAS2R19/TAS2R42/TAS2R60/TAS2R3/TAS2R41/TAS2R43/TAS2R50/TAS2R13/TAS2R46
REACTOME_ROLE_OF_PHOSPHOLIPIDS_IN_PHAGOCYTOSIS	REACTOME_ROLE_OF_PHOSPHOLIPIDS_IN_PHAGOCYTOSIS	82	-0.617642	-1.38437	0.004004	0.15118	0.128123	10454	tags=67%, list=29%, signal=48%	IGLV2-8/IGLC2/IGHV1-46/IGKV3-15/IGKV1-39/PLCG2/IGHV3-11/IGKV1D-39/IGHV3-23/PLA2G6/IGHG2/IGLV1-44/IGLV3-21/IGHV3-53/IGLV1-40/IGLV2-11/IGKV3-20/IGLV7-43/IGKV3D-20/IGKV1-12/IGLV1-47/IGLC3/IGKV2-30/IGKV3-11/IGHV4-39/IGKV1D-12/IGHG4/IGLV2-23/IGHV3-33/IGHV1-2/IGLV3-25/IGLV6-57/IGLV3-19/IGHV3-30/IGHV4-34/IGHG1/IGKV1-33/IGKV1D-16/IGLV3-1/IGHV1-69/IGKV1D-33/IGKV2-28/IGHV3-7/IGKV1-16/IGHV2-5/IGHV3-48/IGKV2…
REACTOME_ROLE_OF_LAT2_NTAL_LAB_ON_CALCIUM_MOBILIZATION	REACTOME_ROLE_OF_LAT2_NTAL_LAB_ON_CALCIUM_MOBILIZATION	71	-0.629326	-1.40116	0.00400802	0.15118	0.128123	10454	tags=73%, list=29%, signal=52%	IGLV2-8/IGLC2/IGHV1-46/MS4A2/IGKV3-15/IGKV1-39/IGHV3-11/IGKV1D-39/IGHV3-23/IGLV1-44/IGLV3-21/IGHV3-53/IGLV1-40/IGLV2-11/IGKV3-20/IGLV7-43/IGKV3D-20/IGKV1-12/IGLV1-47/IGLC3/IGKV2-30/IGKV3-11/IGHV4-39/IGKV1D-12/IGLV2-23/IGHV3-33/IGHV1-2/IGLV3-25/IGLV6-57/IGLV3-19/IGHV3-30/IGHV4-34/IGKV1-33/IGKV1D-16/IGLV3-1/IGHV1-69/IGKV1D-33/IGKV2-28/IGHV3-7/IGKV1-16/IGHV2-5/IGHV3-48/IGHE/IGKV2D-28/IGHV2-70/IGHV4-…
REACTOME_CHROMATIN_MODIFYING_ENZYMES	REACTOME_CHROMATIN_MODIFYING_ENZYMES	271	-0.532258	-1.2305	0.004995	0.179526	0.152146	5318	tags=16%, list=15%, signal=14%	H2AC8/H2BC8/H4C8/H2AC11/H3C4/H3C8/H2BC11/H2BU1/H2AC13/H2BC1/H4C11/PADI1/H2AC20/H2AC7/H2BC18/PADI3/H4-16/H2BC17/H2AC17/H3C13/H2BC9/H3C12/H2BC13/H2BC7/H2AC16/H2BC6/H4C5/H3C1/H4C2/H2AC4/H2AC12/H2AC14/H2AC21/H4C1/H2BC14/H3C7/H4C3/H3C11/H4C4/H2BC10/H2BC3/H4C13/H4C6
REACTOME_FCGR3A_MEDIATED_IL10_SYNTHESIS	REACTOME_FCGR3A_MEDIATED_IL10_SYNTHESIS	95	-0.603225	-1.35669	0.004995	0.179526	0.152146	12141	tags=67%, list=33%, signal=45%	PLCG1/ADCY2/ADCY9/IGKV1-5/IGLV2-14/PRKACG/IGKV4-1/IGLV2-8/IGLC2/IGHV1-46/FGR/IGKV3-15/IGKV1-39/PLCG2/IGHV3-11/IGKV1D-39/IGHV3-23/IGHG2/IGLV1-44/IGLV3-21/IGHV3-53/IGLV1-40/IGLV2-11/IGKV3-20/IGLV7-43/ADCY4/IGKV3D-20/IGKV1-12/IGLV1-47/IGLC3/IGKV2-30/IGKV3-11/ADCY8/IGHV4-39/IGKV1D-12/IGHG4/IGLV2-23/IGHV3-33/IGHV1-2/IGLV3-25/IGLV6-57/IGLV3-19/IGHV3-30/IGHV4-34/IGHG1/IGKV1-33/IGKV1D-16/IGLV3-1/IGHV1-69…
REACTOME_INITIAL_TRIGGERING_OF_COMPLEMENT	REACTOME_INITIAL_TRIGGERING_OF_COMPLEMENT	79	-0.619315	-1.38395	0.00501002	0.179526	0.152146	10833	tags=72%, list=30%, signal=51%	IGKV4-1/CFD/IGLV2-8/IGLC2/IGHV1-46/IGKV3-15/IGKV1-39/FCN3/IGHV3-11/IGKV1D-39/IGHV3-23/IGHG2/IGLV1-44/IGLV3-21/IGHV3-53/IGLV1-40/IGLV2-11/IGKV3-20/IGLV7-43/IGKV3D-20/IGKV1-12/IGLV1-47/IGLC3/IGKV2-30/IGKV3-11/IGHV4-39/IGKV1D-12/IGHG4/IGLV2-23/IGHV3-33/IGHV1-2/IGLV3-25/IGLV6-57/IGLV3-19/IGHV3-30/IGHV4-34/IGHG1/MASP2/IGKV1-33/IGKV1D-16/IGLV3-1/IGHV1-69/IGKV1D-33/IGKV2-28/IGHV3-7/IGKV1-16/IGHV2-5/IGHV…
REACTOME_ANTIGEN_ACTIVATES_B_CELL_RECEPTOR_BCR_LEADING_TO_GENERATION_OF_SECOND_MESSENGERS	REACTOME_ANTIGEN_ACTIVATES_B_CELL_RECEPTOR_BCR_LEADING_TO_GENERATION_OF_SECOND_MESSENGERS	86	-0.606645	-1.36067	0.006	0.187707	0.15908	10833	tags=67%, list=30%, signal=48%	IGKV4-1/IGHD/IGLV2-8/IGLC2/CD79A/IGHV1-46/IGKV3-15/IGKV1-39/PLCG2/IGHV3-11/IGKV1D-39/IGHV3-23/IGLV1-44/IGLV3-21/IGHV3-53/IGLV1-40/IGLV2-11/IGKV3-20/CD22/IGLV7-43/IGKV3D-20/IGKV1-12/IGLV1-47/IGLC3/IGKV2-30/IGKV3-11/IGHV4-39/CD19/IGKV1D-12/IGLV2-23/IGHV3-33/IGHV1-2/IGLV3-25/IGLV6-57/IGLV3-19/IGHV3-30/BLK/IGHV4-34/IGKV1-33/IGKV1D-16/IGLV3-1/IGHV1-69/IGKV1D-33/IGKV2-28/IGHV3-7/IGKV1-16/IGHV2-5/IGHV3-…
BIOCARTA_ETC_PATHWAY	BIOCARTA_ETC_PATHWAY	10	0.784957	2.12077	0.0060241	0.187707	0.15908	4874	tags=80%, list=13%, signal=69%	SLC25A6/SDHB/SDHC/UQCRC1/ATP5F1A/SLC25A4/SDHD/NDUFA1
BIOCARTA_RANMS_PATHWAY	BIOCARTA_RANMS_PATHWAY	10	0.76936	2.07863	0.0060241	0.187707	0.15908	5238	tags=80%, list=14%, signal=69%	AURKA/RAN/TPX2/KPNA2/KIF15/RANBP1/KPNB1/RCC1
BIOCARTA_SKP2E2F_PATHWAY	BIOCARTA_SKP2E2F_PATHWAY	10	0.754757	2.03918	0.0060241	0.187707	0.15908	7749	tags=90%, list=21%, signal=71%	SKP1/CCNA1/CDK2/CCNE1/TFDP1/SKP2/E2F1/CDC34/RB1
REACTOME_CHYLOMICRON_ASSEMBLY	REACTOME_CHYLOMICRON_ASSEMBLY	10	0.786478	2.12488	0.0060241	0.187707	0.15908	1708	tags=40%, list=5%, signal=38%	APOA4/APOC3/MTTP/APOA1
REACTOME_FOLDING_OF_ACTIN_BY_CCT_TRIC	REACTOME_FOLDING_OF_ACTIN_BY_CCT_TRIC	10	0.86039	2.32457	0.0060241	0.187707	0.15908	2759	tags=80%, list=8%, signal=74%	CCT4/CCT2/CCT5/CCT8/CCT7/CCT3/CCT6A/TCP1
REACTOME_MASTL_FACILITATES_MITOTIC_PROGRESSION	REACTOME_MASTL_FACILITATES_MITOTIC_PROGRESSION	10	0.746835	2.01777	0.0060241	0.187707	0.15908	7984	tags=80%, list=22%, signal=63%	CCNB1/CDK1/PPP2CA/MASTL/PPP2CB/PPP2R1A/ARPP19/ENSA
REACTOME_REACTIONS_SPECIFIC_TO_THE_COMPLEX_N_GLYCAN_SYNTHESIS_PATHWAY	REACTOME_REACTIONS_SPECIFIC_TO_THE_COMPLEX_N_GLYCAN_SYNTHESIS_PATHWAY	10	0.734622	1.98478	0.0060241	0.187707	0.15908	295	tags=20%, list=1%, signal=20%	CGA/CHST8
REACTOME_RRNA_PROCESSING_IN_THE_MITOCHONDRION	REACTOME_RRNA_PROCESSING_IN_THE_MITOCHONDRION	10	0.736975	1.99113	0.0060241	0.187707	0.15908	9635	tags=90%, list=26%, signal=66%	TRMT10C/HSD17B10/MRM3/TFB1M/ELAC2/MRM2/MRM1/NSUN4/MTERF4
REACTOME_FCERI_MEDIATED_CA_2_MOBILIZATION	REACTOME_FCERI_MEDIATED_CA_2_MOBILIZATION	86	-0.602181	-1.35065	0.007	0.191776	0.162528	10454	tags=65%, list=29%, signal=47%	IGLV2-8/IGLC2/IGHV1-46/MS4A2/ITK/IGKV3-15/IGKV1-39/PLCG2/IGHV3-11/IGKV1D-39/IGHV3-23/IGLV1-44/IGLV3-21/IGHV3-53/IGLV1-40/IGLV2-11/IGKV3-20/IGLV7-43/IGKV3D-20/IGKV1-12/IGLV1-47/IGLC3/IGKV2-30/IGKV3-11/IGHV4-39/TXK/LAT/IGKV1D-12/IGLV2-23/IGHV3-33/IGHV1-2/IGLV3-25/IGLV6-57/IGLV3-19/IGHV3-30/IGHV4-34/IGKV1-33/IGKV1D-16/IGLV3-1/IGHV1-69/IGKV1D-33/IGKV2-28/IGHV3-7/IGKV1-16/IGHV2-5/IGHV3-48/IGHE/IGKV2D-…
BIOCARTA_AKAP95_PATHWAY	BIOCARTA_AKAP95_PATHWAY	11	0.728382	1.9655	0.00729927	0.191776	0.162528	2731	tags=45%, list=7%, signal=42%	CCNB1/CDK1/NCAPD2/PPP2CA/PRKAG1
BIOCARTA_NPC_PATHWAY	BIOCARTA_NPC_PATHWAY	11	0.749774	2.02323	0.00729927	0.191776	0.162528	5238	tags=64%, list=14%, signal=55%	RAN/KPNA2/KPNB1/NUP210/NUTF2/NUP153/RCC1
BIOCARTA_SRCRPTP_PATHWAY	BIOCARTA_SRCRPTP_PATHWAY	11	0.830453	2.24094	0.00729927	0.191776	0.162528	1219	tags=36%, list=3%, signal=35%	CCNB1/CDC25C/CDK1/CDC25A
KEGG_VALINE_LEUCINE_AND_ISOLEUCINE_BIOSYNTHESIS	KEGG_VALINE_LEUCINE_AND_ISOLEUCINE_BIOSYNTHESIS	11	0.707486	1.90912	0.00729927	0.191776	0.162528	6319	tags=64%, list=17%, signal=53%	BCAT1/LARS1/VARS1/PDHB/IARS1/LARS2/IARS2
REACTOME_CDC6_ASSOCIATION_WITH_THE_ORC_ORIGIN_COMPLEX	REACTOME_CDC6_ASSOCIATION_WITH_THE_ORC_ORIGIN_COMPLEX	11	0.773533	2.08734	0.00729927	0.191776	0.162528	8299	tags=100%, list=23%, signal=77%	ORC1/CDC6/ORC6/ORC5/ORC3/ORC4/E2F2/E2F1/E2F3/MCM8/ORC2
REACTOME_CONDENSATION_OF_PROMETAPHASE_CHROMOSOMES	REACTOME_CONDENSATION_OF_PROMETAPHASE_CHROMOSOMES	11	0.829166	2.23747	0.00729927	0.191776	0.162528	6263	tags=100%, list=17%, signal=83%	CCNB1/NCAPG/CCNB2/CDK1/NCAPH/NCAPD2/SMC4/SMC2/CSNK2B/CSNK2A2/CSNK2A1
REACTOME_METALLOTHIONEINS_BIND_METALS	REACTOME_METALLOTHIONEINS_BIND_METALS	11	0.836583	2.25748	0.00729927	0.191776	0.162528	4942	tags=82%, list=13%, signal=71%	MT1A/MT1B/MT1E/MT1H/MT2A/MT1X/MT1G/MT3/MT1F
REACTOME_PHENYLALANINE_AND_TYROSINE_METABOLISM	REACTOME_PHENYLALANINE_AND_TYROSINE_METABOLISM	11	0.7367	1.98795	0.00729927	0.191776	0.162528	5476	tags=45%, list=15%, signal=39%	PAH/PCBD1/GSTZ1/FAH/QDPR
REACTOME_REMOVAL_OF_THE_FLAP_INTERMEDIATE_FROM_THE_C_STRAND	REACTOME_REMOVAL_OF_THE_FLAP_INTERMEDIATE_FROM_THE_C_STRAND	11	0.737775	1.99085	0.00729927	0.191776	0.162528	5646	tags=64%, list=15%, signal=54%	PCNA/RPA3/FEN1/POLD2/RPA1/RPA2/DNA2
REACTOME_SLBP_DEPENDENT_PROCESSING_OF_REPLICATION_DEPENDENT_HISTONE_PRE_MRNAS	REACTOME_SLBP_DEPENDENT_PROCESSING_OF_REPLICATION_DEPENDENT_HISTONE_PRE_MRNAS	11	0.787078	2.1239	0.00729927	0.191776	0.162528	6908	tags=82%, list=19%, signal=66%	SNRPG/SNRPE/SLBP/SNRPB/SNRPF/NCBP2/LSM11/LSM10/SNRPD3
WP_COMPUTATIONAL_MODEL_OF_AEROBIC_GLYCOLYSIS	WP_COMPUTATIONAL_MODEL_OF_AEROBIC_GLYCOLYSIS	11	0.866214	2.33744	0.00729927	0.191776	0.162528	4139	tags=91%, list=11%, signal=81%	LDHA/GAPDH/SLC2A1/PGK1/TPI1/ENO1/ALDOA/PKM/GPI/PFKM
BIOCARTA_FIBRINOLYSIS_PATHWAY	BIOCARTA_FIBRINOLYSIS_PATHWAY	12	0.776058	2.13204	0.0078125	0.191776	0.162528	1594	tags=58%, list=4%, signal=56%	F2/CPB2/FGA/FGB/PLAU/FGG/F13A1
BIOCARTA_MHC_PATHWAY	BIOCARTA_MHC_PATHWAY	12	0.762201	2.09397	0.0078125	0.191776	0.162528	6285	tags=83%, list=17%, signal=69%	PSMB8/PSMB9/PSMB5/PSMB6/TAP1/HLA-DRB5/HLA-DRA/B2M/TAP2/CD74
REACTOME_PURINE_RIBONUCLEOSIDE_MONOPHOSPHATE_BIOSYNTHESIS	REACTOME_PURINE_RIBONUCLEOSIDE_MONOPHOSPHATE_BIOSYNTHESIS	12	0.822015	2.25829	0.0078125	0.191776	0.162528	3382	tags=58%, list=9%, signal=53%	IMPDH2/PAICS/ADSL/ATIC/GART/GMPS/PPAT
REACTOME_UNWINDING_OF_DNA	REACTOME_UNWINDING_OF_DNA	12	0.851563	2.33947	0.0078125	0.191776	0.162528	4585	tags=92%, list=13%, signal=80%	GINS2/GINS4/GINS3/MCM7/MCM2/MCM4/GINS1/MCM6/CDC45/MCM3/MCM5
REACTOME_TELOMERE_MAINTENANCE	REACTOME_TELOMERE_MAINTENANCE	113	-0.590763	-1.33683	0.00799201	0.191776	0.162528	5318	tags=25%, list=15%, signal=21%	H2AC8/H2BC8/H4C8/H2BC11/H2BU1/H2BC1/H4C11/H3-4/H2AC20/H2AC7/H4-16/H2BC17/H2BC9/H2BC13/H2BC7/H2BC6/H4C5/H4C2/H2AC4/H2AC14/H4C1/H2BC14/H4C3/H4C4/H2BC10/H2BC3/H4C13/H4C6
BIOCARTA_P27_PATHWAY	BIOCARTA_P27_PATHWAY	13	0.765755	2.12243	0.00826446	0.191776	0.162528	7749	tags=92%, list=21%, signal=73%	CKS1B/SKP1/NEDD8/CDK2/CCNE1/RBX1/TFDP1/UBE2M/SKP2/E2F1/CDKN1B/RB1
REACTOME_CHK1_CHK2_CDS1_MEDIATED_INACTIVATION_OF_CYCLIN_B_CDK1_COMPLEX	REACTOME_CHK1_CHK2_CDS1_MEDIATED_INACTIVATION_OF_CYCLIN_B_CDK1_COMPLEX	13	0.806291	2.23479	0.00826446	0.191776	0.162528	3990	tags=69%, list=11%, signal=62%	CCNB1/CDC25C/CDK1/YWHAE/YWHAQ/YWHAZ/CHEK1/SFN/YWHAG
REACTOME_EARLY_PHASE_OF_HIV_LIFE_CYCLE	REACTOME_EARLY_PHASE_OF_HIV_LIFE_CYCLE	14	0.740311	2.09647	0.00877193	0.191776	0.162528	3885	tags=50%, list=11%, signal=45%	HMGA1/XRCC4/FEN1/PPIA/XRCC5/XRCC6/BANF1
REACTOME_GOLGI_CISTERNAE_PERICENTRIOLAR_STACK_REORGANIZATION	REACTOME_GOLGI_CISTERNAE_PERICENTRIOLAR_STACK_REORGANIZATION	14	0.718417	2.03447	0.00877193	0.191776	0.162528	8500	tags=71%, list=23%, signal=55%	CCNB1/CCNB2/CDK1/PLK1/RAB2A/RAB1A/RAB1B/GORASP2/BLZF1/USO1
REACTOME_POLYMERASE_SWITCHING	REACTOME_POLYMERASE_SWITCHING	14	0.764925	2.16618	0.00877193	0.191776	0.162528	5805	tags=71%, list=16%, signal=60%	PRIM1/RFC4/RFC3/PCNA/RFC5/RFC2/PRIM2/POLD2/POLA2/RFC1
REACTOME_RESPONSE_TO_METAL_IONS	REACTOME_RESPONSE_TO_METAL_IONS	14	0.793125	2.24604	0.00877193	0.191776	0.162528	3333	tags=64%, list=9%, signal=58%	MT1A/MT1B/MT1E/MT1H/SNCB/MT2A/MT1X/MT1G/MT3
REACTOME_TP53_REGULATES_TRANSCRIPTION_OF_GENES_INVOLVED_IN_G1_CELL_CYCLE_ARREST	REACTOME_TP53_REGULATES_TRANSCRIPTION_OF_GENES_INVOLVED_IN_G1_CELL_CYCLE_ARREST	14	0.739108	2.09307	0.00877193	0.191776	0.162528	8171	tags=86%, list=22%, signal=67%	CCNA2/E2F7/CCNA1/CDK2/TP53/CCNE1/E2F8/CDKN1A/CCNE2/E2F1/CDKN1B/ARID3A
REACTOME_SUMOYLATION_OF_CHROMATIN_ORGANIZATION_PROTEINS	REACTOME_SUMOYLATION_OF_CHROMATIN_ORGANIZATION_PROTEINS	71	-0.613996	-1.36703	0.00901804	0.191776	0.162528	1742	tags=13%, list=5%, signal=12%	H4C11/H4-16/H4C5/H4C2/H4C1/H4C3/H4C4/H4C13/H4C6
REACTOME_MISMATCH_REPAIR	REACTOME_MISMATCH_REPAIR	15	0.753253	2.18464	0.00934579	0.191776	0.162528	5858	tags=67%, list=16%, signal=56%	EXO1/PCNA/RPA3/POLD2/MSH2/RPA1/RPA2/MLH1/MSH6/MSH3
REACTOME_NUCLEOBASE_BIOSYNTHESIS	REACTOME_NUCLEOBASE_BIOSYNTHESIS	15	0.761694	2.20912	0.00934579	0.191776	0.162528	3743	tags=53%, list=10%, signal=48%	IMPDH2/PAICS/ADSL/ATIC/GART/GMPS/PPAT/UMPS
REACTOME_PENTOSE_PHOSPHATE_PATHWAY	REACTOME_PENTOSE_PHOSPHATE_PATHWAY	15	0.727616	2.11028	0.00934579	0.191776	0.162528	7429	tags=80%, list=20%, signal=64%	TKT/DERA/PGM2/PRPS1/RBKS/RPE/G6PD/PGD/TALDO1/PRPS2/PGLS/RPIA
REACTOME_PROCESSIVE_SYNTHESIS_ON_THE_LAGGING_STRAND	REACTOME_PROCESSIVE_SYNTHESIS_ON_THE_LAGGING_STRAND	15	0.746168	2.16409	0.00934579	0.191776	0.162528	5646	tags=67%, list=15%, signal=56%	PRIM1/PCNA/RPA3/PRIM2/FEN1/POLD2/RPA1/RPA2/POLA2/DNA2
REACTOME_RESPONSE_OF_EIF2AK1_HRI_TO_HEME_DEFICIENCY	REACTOME_RESPONSE_OF_EIF2AK1_HRI_TO_HEME_DEFICIENCY	15	0.702957	2.03877	0.00934579	0.191776	0.162528	7141	tags=67%, list=20%, signal=54%	ASNS/TRIB3/EIF2S3/EIF2S1/EIF2S2/DDIT3/ATF5/ATF4/GRB10/CEBPG
REACTOME_TFAP2_AP_2_FAMILY_REGULATES_TRANSCRIPTION_OF_GROWTH_FACTORS_AND_THEIR_RECEPTORS	REACTOME_TFAP2_AP_2_FAMILY_REGULATES_TRANSCRIPTION_OF_GROWTH_FACTORS_AND_THEIR_RECEPTORS	15	0.712777	2.06725	0.00934579	0.191776	0.162528	5919	tags=53%, list=16%, signal=45%	CGA/CGB5/CGB8/TGFA/ATAD2/TFAP2A/ESR1/EGFR
WP_H19_ACTION_RBE2F1_SIGNALING_AND_CDKBETACATENIN_ACTIVITY	WP_H19_ACTION_RBE2F1_SIGNALING_AND_CDKBETACATENIN_ACTIVITY	15	0.704698	2.04382	0.00934579	0.191776	0.162528	10821	tags=100%, list=30%, signal=70%	PMAIP1/CDK4/CSRP2/MACROH2A1/CTNNB1/CDK8/E2F1/RB1/CCND1/JAG1/TULP3/MED1/CDH1/SOX4/H19
WP_MITOCHONDRIAL_CIII_ASSEMBLY	WP_MITOCHONDRIAL_CIII_ASSEMBLY	15	0.782691	2.27002	0.00934579	0.191776	0.162528	7967	tags=100%, list=22%, signal=78%	CYC1/UQCRQ/UQCRH/UQCC2/UQCRB/UQCRC2/UQCRFS1/UQCRC1/UQCR11/LYRM7/BCS1L/UQCR10/UQCC1/UQCC3/TTC19
WP_REGULATION_OF_SISTER_CHROMATID_SEPARATION_AT_THE_METAPHASEANAPHASE_TRANSITION	WP_REGULATION_OF_SISTER_CHROMATID_SEPARATION_AT_THE_METAPHASEANAPHASE_TRANSITION	15	0.793467	2.30127	0.00934579	0.191776	0.162528	4860	tags=73%, list=13%, signal=64%	MAD2L1/PTTG1/CDC20/BUB1/BUB1B/ESPL1/BUB3/CENPE/ANAPC11/RAD21/SMC3
BIOCARTA_EFP_PATHWAY	BIOCARTA_EFP_PATHWAY	16	0.679986	1.99835	0.00990099	0.191776	0.162528	6705	tags=69%, list=18%, signal=56%	CCNB1/CCNB2/CDK1/CDK7/CDK4/CDK2/TP53/SFN/CDK5/ESR1/CDK8
REACTOME_FORMATION_OF_ATP_BY_CHEMIOSMOTIC_COUPLING	REACTOME_FORMATION_OF_ATP_BY_CHEMIOSMOTIC_COUPLING	16	0.845199	2.48388	0.00990099	0.191776	0.162528	4115	tags=88%, list=11%, signal=78%	ATP5MF/ATP5MC3/ATP5MC2/ATP5PF/ATP5F1B/ATP5PO/ATP5PB/ATP5F1C/ATP5MC1/ATP5ME/ATP5PD/ATP5MG/ATP5F1A/ATP5F1E
REACTOME_GLYCOGEN_STORAGE_DISEASES	REACTOME_GLYCOGEN_STORAGE_DISEASES	16	0.790832	2.32411	0.00990099	0.191776	0.162528	3387	tags=44%, list=9%, signal=40%	G6PC/RPS27A/GBE1/GYS2/UBA52/GYG1/UBB
REACTOME_GLYCOGEN_SYNTHESIS	REACTOME_GLYCOGEN_SYNTHESIS	16	0.710644	2.08845	0.00990099	0.191776	0.162528	5897	tags=62%, list=16%, signal=52%	RPS27A/GBE1/GYS2/UBA52/GYG1/PGM2/UBB/PGM1/UGP2/UBC
REACTOME_MRNA_DECAY_BY_3_TO_5_EXORIBONUCLEASE	REACTOME_MRNA_DECAY_BY_3_TO_5_EXORIBONUCLEASE	16	0.732259	2.15197	0.00990099	0.191776	0.162528	8817	tags=88%, list=24%, signal=66%	EXOSC5/EXOSC2/WDR61/EXOSC4/EXOSC7/EXOSC9/EXOSC1/EXOSC8/EXOSC3/NT5C3B/HBS1L/TTC37/DCPS/DIS3
REACTOME_POLO_LIKE_KINASE_MEDIATED_EVENTS	REACTOME_POLO_LIKE_KINASE_MEDIATED_EVENTS	16	0.812196	2.38689	0.00990099	0.191776	0.162528	3883	tags=62%, list=11%, signal=56%	CCNB1/CDC25C/CCNB2/FOXM1/PLK1/CDC25A/MYBL2/LIN9/PKMYT1/CENPF
REACTOME_TRANSCRIPTION_OF_E2F_TARGETS_UNDER_NEGATIVE_CONTROL_BY_P107_RBL1_AND_P130_RBL2_IN_COMPLEX_WITH_HDAC1	REACTOME_TRANSCRIPTION_OF_E2F_TARGETS_UNDER_NEGATIVE_CONTROL_BY_P107_RBL1_AND_P130_RBL2_IN_COMPLEX_WITH_HDAC1	16	0.700763	2.05941	0.00990099	0.191776	0.162528	9018	tags=75%, list=25%, signal=57%	CCNA2/CDK1/MYBL2/LIN9/E2F5/TFDP1/RBBP4/E2F1/LIN52/E2F4/HDAC1/RBL1
WP_TCA_CYCLE_AND_DEFICIENCY_OF_PYRUVATE_DEHYDROGENASE_COMPLEX_PDHC	WP_TCA_CYCLE_AND_DEFICIENCY_OF_PYRUVATE_DEHYDROGENASE_COMPLEX_PDHC	16	0.754361	2.21692	0.00990099	0.191776	0.162528	6951	tags=75%, list=19%, signal=61%	PCK1/MDH1/CS/FH/SUCLG2/IDH1/DLST/DLD/ACLY/DLAT/IDH3A/PC
REACTOME_TRANSLESION_SYNTHESIS_BY_POLK	REACTOME_TRANSLESION_SYNTHESIS_BY_POLK	17	0.706435	2.13754	0.0111111	0.213294	0.180764	5897	tags=82%, list=16%, signal=69%	RPS27A/RFC4/RFC3/PCNA/RPA3/RFC5/UBA52/RFC2/MAD2L2/UBB/RPA1/RPA2/RFC1/UBC
REACTOME_ESR_MEDIATED_SIGNALING	REACTOME_ESR_MEDIATED_SIGNALING	219	-0.526433	-1.21354	0.011988	0.224942	0.190637	5318	tags=17%, list=15%, signal=15%	H2AC8/H2BC8/H4C8/ESR2/H3C4/H3C8/H2BC11/H2BU1/H2BC1/H4C11/TFF1/H2AC20/H2AC7/GNAT3/H4-16/H2BC17/H3C13/H2BC9/H3C12/H2BC13/H2BC7/H2BC6/H4C5/H3C1/H4C2/H2AC4/H2AC14/H4C1/H2BC14/H3C7/H4C3/H3C11/H4C4/H2BC10/H2BC3/H4C13/H4C6
REACTOME_PROCESSING_OF_DNA_DOUBLE_STRAND_BREAK_ENDS	REACTOME_PROCESSING_OF_DNA_DOUBLE_STRAND_BREAK_ENDS	98	-0.589219	-1.32813	0.011988	0.224942	0.190637	5227	tags=23%, list=14%, signal=20%	H2BC8/H4C8/H2BC11/H2BU1/H2BC1/H4C11/H3-4/H4-16/H2BC17/H2BC9/H2BC13/H2BC7/H2BC6/H4C5/H4C2/H4C1/H2BC14/H4C3/H4C4/H2BC10/H2BC3/H4C13/H4C6
REACTOME_PROCESSING_AND_ACTIVATION_OF_SUMO	REACTOME_PROCESSING_AND_ACTIVATION_OF_SUMO	10	0.727688	1.96604	0.0120482	0.224942	0.190637	6440	tags=80%, list=18%, signal=66%	UBA2/SUMO3/SUMO2/SUMO1/SAE1/UBE2I/SENP1/SENP2
BIOCARTA_MCM_PATHWAY	BIOCARTA_MCM_PATHWAY	18	0.797776	2.48288	0.0123457	0.224942	0.190637	5826	tags=83%, list=16%, signal=70%	CDT1/MCM7/MCM2/ORC1/MCM4/CDC6/ORC6/MCM6/CDK2/MCM3/CCNE1/ORC5/MCM5/ORC3/ORC4
REACTOME_TP53_REGULATES_TRANSCRIPTION_OF_GENES_INVOLVED_IN_G2_CELL_CYCLE_ARREST	REACTOME_TP53_REGULATES_TRANSCRIPTION_OF_GENES_INVOLVED_IN_G2_CELL_CYCLE_ARREST	18	0.738649	2.29886	0.0123457	0.224942	0.190637	4554	tags=56%, list=12%, signal=49%	CCNB1/CDC25C/AURKA/CDK1/PCNA/GADD45A/TP53/PRMT1/SFN/TFDP1
WP_TCA_CYCLE_AKA_KREBS_OR_CITRIC_ACID_CYCLE	WP_TCA_CYCLE_AKA_KREBS_OR_CITRIC_ACID_CYCLE	18	0.739353	2.30105	0.0123457	0.224942	0.190637	6180	tags=72%, list=17%, signal=60%	MDH2/SDHB/SDHC/SUCLG1/CS/FH/SUCLG2/SUCLA2/DLST/DLD/SDHD/IDH3B/IDH3A
REACTOME_G2_M_DNA_DAMAGE_CHECKPOINT	REACTOME_G2_M_DNA_DAMAGE_CHECKPOINT	95	-0.589069	-1.32485	0.012987	0.234639	0.198855	5227	tags=24%, list=14%, signal=21%	H2BC8/H4C8/H2BC11/H2BU1/H2BC1/H4C11/H3-4/H4-16/H2BC17/H2BC9/H2BC13/H2BC7/H2BC6/H4C5/H4C2/H4C1/H2BC14/H4C3/H4C4/H2BC10/H2BC3/H4C13/H4C6
BIOCARTA_PROTEASOME_PATHWAY	BIOCARTA_PROTEASOME_PATHWAY	19	0.778948	2.45832	0.0138889	0.23865	0.202254	6831	tags=89%, list=19%, signal=73%	PSMA6/PSMA5/PSMA4/PSMB7/PSMB5/PSMA3/PSMB1/PSMA7/PSMB6/PSMA1/UBE2A/PSMB4/PSMA2/PSMB3/PSMB2/RPN1/RPN2
REACTOME_INITIATION_OF_NUCLEAR_ENVELOPE_NE_REFORMATION	REACTOME_INITIATION_OF_NUCLEAR_ENVELOPE_NE_REFORMATION	19	0.737212	2.32661	0.0138889	0.23865	0.202254	7681	tags=74%, list=21%, signal=58%	CCNB1/CCNB2/CDK1/LMNB1/TMPO/VRK1/PPP2CA/BANF1/KPNB1/PPP2R2A/EMD/LBR/PPP2R1A/VRK2
REACTOME_PROCESSIVE_SYNTHESIS_ON_THE_C_STRAND_OF_THE_TELOMERE	REACTOME_PROCESSIVE_SYNTHESIS_ON_THE_C_STRAND_OF_THE_TELOMERE	19	0.691599	2.18266	0.0138889	0.23865	0.202254	9943	tags=84%, list=27%, signal=61%	PCNA/RPA3/FEN1/POLD2/RPA1/RPA2/BLM/POT1/DNA2/TINF2/TERF1/TERF2/POLD1/POLD4/LIG1/TERF2IP
REACTOME_TRANSCRIPTION_OF_E2F_TARGETS_UNDER_NEGATIVE_CONTROL_BY_DREAM_COMPLEX	REACTOME_TRANSCRIPTION_OF_E2F_TARGETS_UNDER_NEGATIVE_CONTROL_BY_DREAM_COMPLEX	19	0.70975	2.23994	0.0138889	0.23865	0.202254	9018	tags=79%, list=25%, signal=60%	MYC/CDC25A/CDC6/TOP2A/PCNA/LIN9/E2F5/TFDP1/RBBP4/E2F1/LIN52/MAX/E2F4/HDAC1/RBL1
REACTOME_TRANSLESION_SYNTHESIS_BY_POLH	REACTOME_TRANSLESION_SYNTHESIS_BY_POLH	19	0.751514	2.37175	0.0138889	0.23865	0.202254	6134	tags=74%, list=17%, signal=61%	RPS27A/RFC4/RFC3/PCNA/RPA3/RFC5/UBA52/RFC2/UBB/RPA1/RPA2/RFC1/UBC/RCHY1
WP_NUCLEOTIDE_METABOLISM	WP_NUCLEOTIDE_METABOLISM	19	0.738884	2.33189	0.0138889	0.23865	0.202254	6239	tags=68%, list=17%, signal=57%	RRM2/MTHFD2/NME2/HPRT1/ADSL/DHFR/POLB/RRM1/PRPS1/OAZ1/PRPS2/SRM/RRM2B
REACTOME_FCERI_MEDIATED_MAPK_ACTIVATION	REACTOME_FCERI_MEDIATED_MAPK_ACTIVATION	87	-0.590821	-1.32764	0.013986	0.23865	0.202254	10935	tags=66%, list=30%, signal=46%	FOS/IGKV4-1/IGLV2-8/IGLC2/IGHV1-46/MS4A2/IGKV3-15/IGKV1-39/PLCG2/IGHV3-11/MAPK10/IGKV1D-39/IGHV3-23/IGLV1-44/IGLV3-21/IGHV3-53/IGLV1-40/IGLV2-11/IGKV3-20/IGLV7-43/IGKV3D-20/IGKV1-12/IGLV1-47/IGLC3/IGKV2-30/IGKV3-11/IGHV4-39/LAT/IGKV1D-12/IGLV2-23/IGHV3-33/IGHV1-2/IGLV3-25/IGLV6-57/IGLV3-19/IGHV3-30/IGHV4-34/IGKV1-33/IGKV1D-16/IGLV3-1/IGHV1-69/IGKV1D-33/IGKV2-28/IGHV3-7/IGKV1-16/IGHV2-5/IGHV3-48/I…
REACTOME_LAGGING_STRAND_SYNTHESIS	REACTOME_LAGGING_STRAND_SYNTHESIS	20	0.77571	2.44569	0.0144928	0.239594	0.203054	5805	tags=75%, list=16%, signal=63%	PRIM1/RFC4/RFC3/PCNA/RPA3/RFC5/RFC2/PRIM2/FEN1/POLD2/RPA1/RPA2/POLA2/DNA2/RFC1
REACTOME_PHOSPHORYLATION_OF_THE_APC_C	REACTOME_PHOSPHORYLATION_OF_THE_APC_C	20	0.712608	2.24674	0.0144928	0.239594	0.203054	7993	tags=80%, list=22%, signal=63%	CCNB1/UBE2C/CDK1/PLK1/UBE2E1/UBE2S/CDC23/ANAPC11/ANAPC10/ANAPC16/ANAPC15/CDC26/UBE2D1/ANAPC5/CDC27/ANAPC7
BIOCARTA_PTC1_PATHWAY	BIOCARTA_PTC1_PATHWAY	11	0.665661	1.79626	0.0145985	0.239594	0.203054	1219	tags=45%, list=3%, signal=44%	CCNB1/CDC25C/CDK1/CDK7/CDC25A
REACTOME_APOPTOTIC_CLEAVAGE_OF_CELL_ADHESION_PROTEINS	REACTOME_APOPTOTIC_CLEAVAGE_OF_CELL_ADHESION_PROTEINS	11	0.660137	1.78135	0.0145985	0.239594	0.203054	6220	tags=55%, list=17%, signal=45%	DSG2/DSG3/PKP1/DSP/CTNNB1/OCLN
REACTOME_ATF6_ATF6_ALPHA_ACTIVATES_CHAPERONES	REACTOME_ATF6_ATF6_ALPHA_ACTIVATES_CHAPERONES	11	0.679324	1.83313	0.0145985	0.239594	0.203054	8230	tags=73%, list=22%, signal=56%	DDIT3/MBTPS2/NFYA/HSPA5/ATF4/CALR/HSP90B1/ATF6
REACTOME_MITOCHONDRIAL_TRNA_AMINOACYLATION	REACTOME_MITOCHONDRIAL_TRNA_AMINOACYLATION	21	0.72926	2.34885	0.0151515	0.241899	0.205007	7885	tags=76%, list=22%, signal=60%	YARS2/PPA2/KARS1/DARS2/FARS2/GARS1/WARS2/MARS2/HARS2/QARS1/RARS2/LARS2/EARS2/IARS2/PARS2/TARS2
REACTOME_PCNA_DEPENDENT_LONG_PATCH_BASE_EXCISION_REPAIR	REACTOME_PCNA_DEPENDENT_LONG_PATCH_BASE_EXCISION_REPAIR	21	0.794521	2.55904	0.0151515	0.241899	0.205007	4595	tags=71%, list=13%, signal=62%	RFC4/RFC3/POLE3/PCNA/RPA3/RFC5/APEX1/RFC2/POLE4/FEN1/POLB/POLE2/POLD2/RPA1/RPA2
REACTOME_PINK1_PRKN_MEDIATED_MITOPHAGY	REACTOME_PINK1_PRKN_MEDIATED_MITOPHAGY	21	0.765184	2.46455	0.0151515	0.241899	0.205007	5935	tags=76%, list=16%, signal=64%	SQSTM1/TOMM20/RPS27A/VDAC1/TOMM22/UBA52/TOMM5/UBB/MTERF3/TOMM40/TOMM70/TOMM7/ATG5/ATG12/UBC/MAP1LC3B
BIOCARTA_PRION_PATHWAY	BIOCARTA_PRION_PATHWAY	12	0.665986	1.82964	0.015625	0.241899	0.205007	7709	tags=58%, list=21%, signal=46%	RPSA/DNAJB1/LAMA1/HSPA5/PRNP/LAMC1/GFAP
REACTOME_FGFR1C_LIGAND_BINDING_AND_ACTIVATION	REACTOME_FGFR1C_LIGAND_BINDING_AND_ACTIVATION	12	0.655039	1.79956	0.015625	0.241899	0.205007	98	tags=25%, list=0%, signal=25%	FGF4/FGF5/FGF8
WP_RALA_DOWNSTREAM_REGULATED_GENES	WP_RALA_DOWNSTREAM_REGULATED_GENES	12	0.688638	1.89187	0.015625	0.241899	0.205007	8509	tags=83%, list=23%, signal=64%	KRAS/YBX3/CDC42/NRAS/RAC2/EXOC2/RAC3/RAC1/RALA/RALBP1
BIOCARTA_RAB_PATHWAY	BIOCARTA_RAB_PATHWAY	13	0.717616	1.98901	0.0165289	0.241899	0.205007	10333	tags=92%, list=28%, signal=66%	RAB3A/RAB7A/RAB2A/RAB11A/RAB9A/RAB1A/RAB8A/RAB4A/RAB6A/RAB5A/ACTA1/RAB6C
REACTOME_MITOCHONDRIAL_IRON_SULFUR_CLUSTER_BIOGENESIS	REACTOME_MITOCHONDRIAL_IRON_SULFUR_CLUSTER_BIOGENESIS	13	0.704377	1.95232	0.0165289	0.241899	0.205007	9623	tags=85%, list=26%, signal=62%	LYRM4/ISCA2/FXN/HSCB/ISCA1/GLRX5/FDX1/FDXR/ISCU/NFS1/FDX2
REACTOME_PEPTIDE_HORMONE_BIOSYNTHESIS	REACTOME_PEPTIDE_HORMONE_BIOSYNTHESIS	14	0.643677	1.82282	0.0175439	0.241899	0.205007	2388	tags=43%, list=7%, signal=40%	CGA/CGB5/INHA/INHBC/CGB8/PCSK1
WP_DNA_MISMATCH_REPAIR	WP_DNA_MISMATCH_REPAIR	23	0.788025	2.64895	0.0178571	0.241899	0.205007	5805	tags=74%, list=16%, signal=62%	EXO1/RFC4/RFC3/POLE3/PCNA/RPA3/RFC5/RFC2/POLE4/POLE2/POLD2/MSH2/RPA1/RPA2/MLH1/MSH6/RFC1
REACTOME_SCAVENGING_OF_HEME_FROM_PLASMA	REACTOME_SCAVENGING_OF_HEME_FROM_PLASMA	69	-0.602198	-1.34004	0.0180361	0.241899	0.205007	10454	tags=78%, list=29%, signal=56%	IGLV2-8/IGLC2/IGHV1-46/IGKV3-15/IGKV1-39/LRP1/IGHV3-11/IGKV1D-39/IGHV3-23/IGLV1-44/IGLV3-21/IGHV3-53/IGLV1-40/IGLV2-11/IGKV3-20/IGLV7-43/IGKV3D-20/IGKV1-12/HPX/IGLV1-47/IGLC3/IGKV2-30/IGKV3-11/IGHV4-39/IGHA2/IGKV1D-12/IGHA1/IGLV2-23/IGHV3-33/IGHV1-2/IGLV3-25/IGLV6-57/IGLV3-19/IGHV3-30/IGHV4-34/IGKV1-33/IGKV1D-16/IGLV3-1/IGHV1-69/IGKV1D-33/IGKV2-28/IGHV3-7/IGKV1-16/IGHV2-5/IGHV3-48/IGKV2D-28/IGHV2…
REACTOME_ACTIVATION_OF_BAD_AND_TRANSLOCATION_TO_MITOCHONDRIA_	REACTOME_ACTIVATION_OF_BAD_AND_TRANSLOCATION_TO_MITOCHONDRIA_	15	0.67531	1.95858	0.0186916	0.241899	0.205007	5972	tags=53%, list=16%, signal=45%	YWHAE/YWHAQ/YWHAZ/SFN/YWHAG/PPP3R1/BID/YWHAB
REACTOME_APC_C_CDC20_MEDIATED_DEGRADATION_OF_CYCLIN_B	REACTOME_APC_C_CDC20_MEDIATED_DEGRADATION_OF_CYCLIN_B	24	0.726065	2.50563	0.0188679	0.241899	0.205007	7406	tags=79%, list=20%, signal=63%	CCNB1/UBE2C/CDK1/CDC20/RPS27A/UBE2E1/UBE2S/UBA52/CDC23/UBB/ANAPC11/ANAPC10/ANAPC16/ANAPC15/CDC26/UBC/UBE2D1/ANAPC5/CDC27
REACTOME_CYTOSOLIC_TRNA_AMINOACYLATION	REACTOME_CYTOSOLIC_TRNA_AMINOACYLATION	24	0.800054	2.76097	0.0188679	0.241899	0.205007	5965	tags=92%, list=16%, signal=77%	PPA1/RARS1/EEF1E1/FARSB/LARS1/DARS1/VARS1/KARS1/AIMP2/SARS1/TARS1/HARS1/FARSA/GARS1/AIMP1/IARS1/YARS1/WARS1/QARS1/MARS1/EPRS1/NARS1
REACTOME_RESOLUTION_OF_AP_SITES_VIA_THE_MULTIPLE_NUCLEOTIDE_PATCH_REPLACEMENT_PATHWAY	REACTOME_RESOLUTION_OF_AP_SITES_VIA_THE_MULTIPLE_NUCLEOTIDE_PATCH_REPLACEMENT_PATHWAY	24	0.763073	2.63334	0.0188679	0.241899	0.205007	4595	tags=67%, list=13%, signal=58%	RFC4/RFC3/POLE3/PCNA/RPA3/RFC5/APEX1/RFC2/POLE4/FEN1/POLB/POLE2/POLD2/RPA1/PARP1/RPA2
REACTOME_ANTIGEN_PRESENTATION_FOLDING_ASSEMBLY_AND_PEPTIDE_LOADING_OF_CLASS_I_MHC	REACTOME_ANTIGEN_PRESENTATION_FOLDING_ASSEMBLY_AND_PEPTIDE_LOADING_OF_CLASS_I_MHC	25	0.730751	2.4936	0.0196078	0.241899	0.205007	8464	tags=76%, list=23%, signal=58%	HLA-G/CANX/ERAP2/TAP1/B2M/HSPA5/TAP2/SEC13/CALR/SEC24C/HLA-C/HLA-A/SAR1B/ERAP1/SEC23A/BCAP31/SEC24B/SEC24A/HLA-B
REACTOME_CYCLIN_A_B1_B2_ASSOCIATED_EVENTS_DURING_G2_M_TRANSITION	REACTOME_CYCLIN_A_B1_B2_ASSOCIATED_EVENTS_DURING_G2_M_TRANSITION	25	0.741074	2.52882	0.0196078	0.241899	0.205007	6304	tags=72%, list=17%, signal=60%	CCNB1/CDC25C/CCNA2/CCNB2/FOXM1/CDK1/PLK1/CDK7/CDC25A/PPP2CA/CCNA1/CDK2/PKMYT1/LCMT1/PPP2R2A/CCNH/MNAT1/PPP2CB
REACTOME_GAP_FILLING_DNA_REPAIR_SYNTHESIS_AND_LIGATION_IN_GG_NER	REACTOME_GAP_FILLING_DNA_REPAIR_SYNTHESIS_AND_LIGATION_IN_GG_NER	25	0.763319	2.60473	0.0196078	0.241899	0.205007	5897	tags=68%, list=16%, signal=57%	RPS27A/RFC4/RFC3/POLE3/PCNA/RPA3/RFC5/UBA52/RFC2/POLE4/POLE2/POLD2/UBB/RPA1/RPA2/RFC1/UBC
BIOCARTA_EIF_PATHWAY	BIOCARTA_EIF_PATHWAY	16	0.675456	1.98504	0.019802	0.241899	0.205007	6151	tags=75%, list=17%, signal=62%	EIF2S3/EEF2/EIF2S1/EIF2S2/EIF1/EIF4A2/EIF4E/EIF6/EIF1AX/EIF3A/EIF4G1/EIF4G2
KEGG_GLYOXYLATE_AND_DICARBOXYLATE_METABOLISM	KEGG_GLYOXYLATE_AND_DICARBOXYLATE_METABOLISM	16	0.654543	1.92358	0.019802	0.241899	0.205007	4688	tags=50%, list=13%, signal=44%	HAO1/MTHFD2/MTHFD1/MDH1/MDH2/CS/GRHPR/MTHFD1L
REACTOME_ASSEMBLY_OF_THE_HIV_VIRION	REACTOME_ASSEMBLY_OF_THE_HIV_VIRION	16	0.664677	1.95336	0.019802	0.241899	0.205007	5902	tags=56%, list=16%, signal=47%	RPS27A/UBA52/PPIA/UBB/UBAP1/TSG101/MVB12A/UBC/FURIN
REACTOME_MAP3K8_TPL2_DEPENDENT_MAPK1_3_ACTIVATION	REACTOME_MAP3K8_TPL2_DEPENDENT_MAPK1_3_ACTIVATION	16	0.63085	1.85395	0.019802	0.241899	0.205007	8120	tags=62%, list=22%, signal=49%	RPS27A/SKP1/UBA52/UBB/FBXW11/MAP2K1/UBC/TNIP2/CHUK/MAP2K4
REACTOME_PROCESSING_OF_SMDT1	REACTOME_PROCESSING_OF_SMDT1	16	0.637771	1.87429	0.019802	0.241899	0.205007	7233	tags=69%, list=20%, signal=55%	PHB2/STOML2/PHB/PMPCB/MAIP1/MCUB/PARL/MICU2/YME1L1/SMDT1/PMPCA
WP_NAD_METABOLISM	WP_NAD_METABOLISM	16	0.602822	1.77158	0.019802	0.241899	0.205007	6774	tags=38%, list=19%, signal=31%	NT5E/NRK/NAMPT/PARP1/NMNAT2/NMNAT3
REACTOME_G0_AND_EARLY_G1	REACTOME_G0_AND_EARLY_G1	27	0.711379	2.48139	0.0212766	0.241899	0.205007	6027	tags=59%, list=16%, signal=50%	CCNA2/MYC/CDK1/CDC25A/MYBL2/CDC6/TOP2A/PCNA/LIN9/CCNA1/CDK2/CCNE1/E2F5/TFDP1/CCNE2/RBBP4
REACTOME_POSTMITOTIC_NUCLEAR_PORE_COMPLEX_NPC_REFORMATION	REACTOME_POSTMITOTIC_NUCLEAR_PORE_COMPLEX_NPC_REFORMATION	27	0.711902	2.48322	0.0212766	0.241899	0.205007	10443	tags=96%, list=29%, signal=69%	RAN/NUP37/NUP35/SUMO1/NDC1/SEH1L/KPNB1/NUP54/RCC1/NUP93/NUP107/UBE2I/SEC13/NUP205/NUP155/TNPO1/NUP133/RANGAP1/NUP160/NUP43/NUP85/NUP98/NUP62/AHCTF1/NUP58/POM121
BIOCARTA_G1_PATHWAY	BIOCARTA_G1_PATHWAY	28	0.493462	1.79044	0.0217391	0.241899	0.205007	9448	tags=64%, list=26%, signal=48%	CDK1/CDC25A/DHFR/CDK4/CCNA1/CDK2/TP53/CCNE1/TFDP1/CDKN1A/SKP2/E2F1/CDKN1B/RB1/CCND1/HDAC1/CDKN2A/TGFB1
KEGG_HOMOLOGOUS_RECOMBINATION	KEGG_HOMOLOGOUS_RECOMBINATION	28	0.475305	1.72456	0.0217391	0.241899	0.205007	5731	tags=46%, list=16%, signal=39%	RAD51/RPA3/SSBP1/RAD54L/POLD2/RAD50/RPA1/NBN/RPA2/EME1/BLM/XRCC2/SEM1
PID_BARD1_PATHWAY	PID_BARD1_PATHWAY	28	0.620448	2.25118	0.0217391	0.241899	0.205007	6357	tags=64%, list=17%, signal=53%	RAD51/PCNA/FANCE/XRCC5/CDK2/XRCC6/TP53/CCNE1/FANCD2/RAD50/NBN/UBE2D3/RBBP8/BRCA1/CSTF1/TOPBP1/PRKDC/FANCG
PID_LIS1_PATHWAY	PID_LIS1_PATHWAY	28	0.567478	2.05899	0.0217391	0.241899	0.205007	8366	tags=64%, list=23%, signal=50%	YWHAE/RELN/CDK5R2/DYNLT1/CDC42/RHOA/CDK5/PPP2R5D/MAP1B/CSNK2A1/KATNA1/NUDC/LRPAP1/CDK5R1/RAC1/PAFAH1B2/PAFAH1B3/IQGAP1
REACTOME_ATTENUATION_PHASE	REACTOME_ATTENUATION_PHASE	28	0.619642	2.24826	0.0217391	0.241899	0.205007	6638	tags=64%, list=18%, signal=53%	HSPA6/FKBP4/PTGES3/HSP90AB1/HSPA8/DNAJB1/HSPA1B/HSP90AA1/UBB/HSPA1A/HSBP1/MRPL18/HSPB1/HSF1/RLN1/SERPINH1/HSPH1/GML
REACTOME_BUDDING_AND_MATURATION_OF_HIV_VIRION	REACTOME_BUDDING_AND_MATURATION_OF_HIV_VIRION	28	0.59716	2.16668	0.0217391	0.241899	0.205007	8217	tags=57%, list=22%, signal=44%	RPS27A/CHMP4C/UBA52/PPIA/UBB/UBAP1/CHMP5/CHMP2B/TSG101/MVB12A/VTA1/UBC/VPS28/CHMP2A/CHMP3/VPS4B
REACTOME_MITOPHAGY	REACTOME_MITOPHAGY	28	0.746487	2.70849	0.0217391	0.241899	0.205007	6263	tags=75%, list=17%, signal=62%	SQSTM1/TOMM20/RPS27A/VDAC1/TOMM22/PGAM5/UBA52/TOMM5/UBB/MTERF3/TOMM40/TOMM70/FUNDC1/TOMM7/CSNK2B/CSNK2A2/ATG5/ATG12/UBC/MAP1LC3B/CSNK2A1
REACTOME_PROCESSING_OF_CAPPED_INTRONLESS_PRE_MRNA	REACTOME_PROCESSING_OF_CAPPED_INTRONLESS_PRE_MRNA	28	0.642948	2.33282	0.0217391	0.241899	0.205007	7856	tags=68%, list=21%, signal=53%	SNRPG/SNRPE/SLBP/SNRPB/SNRPF/CPSF3/CPSF4/NCBP2/LSM11/LSM10/NUDT21/CPSF2/CSTF2/CSTF1/CSTF2T/CLP1/SNRPD3/CSTF3/FIP1L1
REACTOME_RNA_POLYMERASE_III_TRANSCRIPTION_INITIATION_FROM_TYPE_1_PROMOTER	REACTOME_RNA_POLYMERASE_III_TRANSCRIPTION_INITIATION_FROM_TYPE_1_PROMOTER	28	0.587443	2.13143	0.0217391	0.241899	0.205007	8496	tags=79%, list=23%, signal=60%	POLR3G/GTF3A/POLR1D/POLR2K/POLR3K/POLR1C/POLR2H/POLR3C/POLR2L/GTF3C3/GTF3C6/POLR2E/GTF3C2/POLR3A/POLR3B/POLR3H/TBP/POLR3GL/POLR3D/GTF3C4/GTF3C5/POLR3F
REACTOME_RNA_POLYMERASE_III_TRANSCRIPTION_INITIATION_FROM_TYPE_3_PROMOTER	REACTOME_RNA_POLYMERASE_III_TRANSCRIPTION_INITIATION_FROM_TYPE_3_PROMOTER	28	0.582777	2.1145	0.0217391	0.241899	0.205007	8496	tags=75%, list=23%, signal=58%	POLR3G/POLR1D/POLR2K/BRF2/POLR3K/POLR1C/SNAPC1/POLR2H/POLR3C/SNAPC5/POLR2L/ZNF143/SNAPC2/POLR2E/POLR3A/POLR3B/POLR3H/TBP/POLR3GL/POLR3D/POLR3F
REACTOME_SULFUR_AMINO_ACID_METABOLISM	REACTOME_SULFUR_AMINO_ACID_METABOLISM	28	0.551362	2.00051	0.0217391	0.241899	0.205007	7639	tags=61%, list=21%, signal=48%	MAT1A/BHMT/AHCY/GOT1/SQOR/BHMT2/GOT2/CTH/MTRR/TXN2/ETHE1/ENOPH1/CBS/ADI1/MTAP/TST/TSTD1
REACTOME_TRANSLATION_OF_STRUCTURAL_PROTEINS	REACTOME_TRANSLATION_OF_STRUCTURAL_PROTEINS	28	0.495168	1.79662	0.0217391	0.241899	0.205007	7791	tags=50%, list=21%, signal=39%	RPS27A/CANX/UBA52/SUMO1/UBB/GANAB/UBE2I/UBC/PARP9/ST6GALNAC4/ST3GAL1/PRKCSH/ST6GALNAC3/MGAT1
REACTOME_ESTABLISHMENT_OF_SISTER_CHROMATID_COHESION	REACTOME_ESTABLISHMENT_OF_SISTER_CHROMATID_COHESION	11	0.637765	1.72098	0.0218978	0.241899	0.205007	9434	tags=73%, list=26%, signal=54%	CDCA5/ESCO2/RAD21/SMC3/PDS5A/STAG2/SMC1A/WAPL
WP_NAD_METABOLISM_SIRTUINS_AND_AGING	WP_NAD_METABOLISM_SIRTUINS_AND_AGING	11	0.635562	1.71504	0.0218978	0.241899	0.205007	4520	tags=45%, list=12%, signal=40%	TFAM/NAMPT/PPARG/HIF1A/PARP1
BIOCARTA_TEL_PATHWAY	BIOCARTA_TEL_PATHWAY	17	0.663321	2.00708	0.0222222	0.241899	0.205007	6333	tags=59%, list=17%, signal=49%	MYC/PPP2CA/KRAS/HSP90AA1/XRCC5/XRCC6/TP53/TERT/EGFR/TERF1
REACTOME_ABERRANT_REGULATION_OF_MITOTIC_G1_S_TRANSITION_IN_CANCER_DUE_TO_RB1_DEFECTS	REACTOME_ABERRANT_REGULATION_OF_MITOTIC_G1_S_TRANSITION_IN_CANCER_DUE_TO_RB1_DEFECTS	17	0.647946	1.96056	0.0222222	0.241899	0.205007	8051	tags=76%, list=22%, signal=60%	CDK4/CDK2/CCNE1/TFDP1/CCND3/CDKN1A/CCNE2/E2F2/E2F1/E2F3/CDKN1B/RB1/CCND1
REACTOME_APC_CDC20_MEDIATED_DEGRADATION_OF_NEK2A	REACTOME_APC_CDC20_MEDIATED_DEGRADATION_OF_NEK2A	26	0.734202	2.45662	0.0222222	0.241899	0.205007	7406	tags=81%, list=20%, signal=64%	MAD2L1/UBE2C/NEK2/CDC20/RPS27A/BUB1B/UBE2E1/UBE2S/UBA52/BUB3/CDC23/UBB/ANAPC11/ANAPC10/ANAPC16/ANAPC15/CDC26/UBC/UBE2D1/ANAPC5/CDC27
REACTOME_KSRP_KHSRP_BINDS_AND_DESTABILIZES_MRNA	REACTOME_KSRP_KHSRP_BINDS_AND_DESTABILIZES_MRNA	17	0.607931	1.83948	0.0222222	0.241899	0.205007	7676	tags=71%, list=21%, signal=56%	EXOSC5/YWHAZ/EXOSC2/EXOSC4/EXOSC7/EXOSC9/EXOSC1/KHSRP/EXOSC8/EXOSC3/PARN/MAPK14
REACTOME_PROTEIN_METHYLATION	REACTOME_PROTEIN_METHYLATION	17	0.676181	2.04599	0.0222222	0.241899	0.205007	5030	tags=47%, list=14%, signal=41%	EEF1A1/RPS2/EEF2/HSPA8/PRMT3/EEF1AKMT1/EEF2KMT/ETFB
WP_CORI_CYCLE	WP_CORI_CYCLE	17	0.656741	1.98717	0.0222222	0.241899	0.205007	4879	tags=71%, list=13%, signal=61%	LDHA/GAPDH/SLC2A1/PGK1/PGAM1/TPI1/ALDOA/PFKP/GPI/G6PD/TALDO1/PGK2
BIOCARTA_HSWI_SNF_PATHWAY	BIOCARTA_HSWI_SNF_PATHWAY	12	0.608635	1.67208	0.0234375	0.241899	0.205007	10000	tags=75%, list=27%, signal=55%	SMARCC1/NR3C1/ACTB/SMARCB1/SMARCD1/TBP/SMARCA4/SMARCE1/SMARCC2
REACTOME_TICAM1_DEPENDENT_ACTIVATION_OF_IRF3_IRF7	REACTOME_TICAM1_DEPENDENT_ACTIVATION_OF_IRF3_IRF7	12	0.619139	1.70094	0.0234375	0.241899	0.205007	7438	tags=58%, list=20%, signal=46%	RPS27A/UBA52/UBB/TLR3/UBC/TANK/TICAM1
REACTOME_VLDLR_INTERNALISATION_AND_DEGRADATION	REACTOME_VLDLR_INTERNALISATION_AND_DEGRADATION	12	0.641975	1.76367	0.0234375	0.241899	0.205007	6039	tags=42%, list=16%, signal=35%	AP2S1/AP2M1/CLTA/PCSK9/AP2B1
BIOCARTA_DNAFRAGMENT_PATHWAY	BIOCARTA_DNAFRAGMENT_PATHWAY	10	0.692599	1.87124	0.0240964	0.241899	0.205007	9245	tags=70%, list=25%, signal=52%	HMGB2/TOP2A/HMGB1/DFFA/GZMB/CASP3/ENDOG
BIOCARTA_MTA3_PATHWAY	BIOCARTA_MTA3_PATHWAY	18	0.585969	1.82368	0.0246914	0.241899	0.205007	5647	tags=33%, list=15%, signal=28%	TUBA3C/GAPDH/TUBA4A/ALDOA/HSPB1/ESR1
KEGG_PHENYLALANINE_METABOLISM	KEGG_PHENYLALANINE_METABOLISM	18	0.583208	1.81509	0.0246914	0.241899	0.205007	5780	tags=39%, list=16%, signal=33%	PAH/GOT1/PRDX6/GOT2/MIF/MAOA/DDC
REACTOME_DISEASES_ASSOCIATED_WITH_GLYCOSYLATION_PRECURSOR_BIOSYNTHESIS	REACTOME_DISEASES_ASSOCIATED_WITH_GLYCOSYLATION_PRECURSOR_BIOSYNTHESIS	18	0.51863	1.61411	0.0246914	0.241899	0.205007	8231	tags=50%, list=22%, signal=39%	DPM1/PGM1/NEU1/MPI/GLB1/GALK1/NUS1/DPM2/DOLK
REACTOME_GASTRIN_CREB_SIGNALLING_PATHWAY_VIA_PKC_AND_MAPK	REACTOME_GASTRIN_CREB_SIGNALLING_PATHWAY_VIA_PKC_AND_MAPK	18	0.539693	1.67966	0.0246914	0.241899	0.205007	6432	tags=33%, list=18%, signal=27%	GAST/CCKBR/KRAS/NRAS/EGFR/HBEGF
REACTOME_PI_3K_CASCADE_FGFR3	REACTOME_PI_3K_CASCADE_FGFR3	18	0.582171	1.81186	0.0246914	0.241899	0.205007	98	tags=17%, list=0%, signal=17%	FGF4/FGF5/FGF8
REACTOME_RNA_POLYMERASE_III_CHAIN_ELONGATION	REACTOME_RNA_POLYMERASE_III_CHAIN_ELONGATION	18	0.634196	1.97377	0.0246914	0.241899	0.205007	9112	tags=89%, list=25%, signal=67%	POLR3G/POLR1D/POLR2K/POLR3K/POLR1C/POLR2H/POLR3C/POLR2L/POLR2E/POLR3A/POLR3B/POLR3H/POLR3GL/POLR3D/POLR3F/CRCP
REACTOME_SHC_MEDIATED_CASCADE_FGFR3	REACTOME_SHC_MEDIATED_CASCADE_FGFR3	18	0.570756	1.77634	0.0246914	0.241899	0.205007	98	tags=17%, list=0%, signal=17%	FGF4/FGF5/FGF8
BIOCARTA_RB_PATHWAY	BIOCARTA_RB_PATHWAY	13	0.650934	1.80419	0.0247934	0.241899	0.205007	3469	tags=54%, list=9%, signal=49%	CDC25C/CDK1/CDC25A/CDK4/CHEK1/CDK2/TP53
REACTOME_ERKS_ARE_INACTIVATED	REACTOME_ERKS_ARE_INACTIVATED	13	0.660218	1.82992	0.0247934	0.241899	0.205007	7487	tags=46%, list=20%, signal=37%	PPP2CA/DUSP6/DUSP7/PPP2R5D/PPP2CB/PPP2R1A
REACTOME_INHIBITION_OF_REPLICATION_INITIATION_OF_DAMAGED_DNA_BY_RB1_E2F1	REACTOME_INHIBITION_OF_REPLICATION_INITIATION_OF_DAMAGED_DNA_BY_RB1_E2F1	13	0.650583	1.80322	0.0247934	0.241899	0.205007	8069	tags=77%, list=22%, signal=60%	PRIM1/PPP2CA/PRIM2/TFDP1/POLA2/PPP2CB/E2F1/PPP2R1A/RB1/POLA1
BIOCARTA_BIOPEPTIDES_PATHWAY	BIOCARTA_BIOPEPTIDES_PATHWAY	29	0.517103	1.80801	0.027027	0.241899	0.205007	6674	tags=28%, list=18%, signal=23%	KNG1/F2/CALM2/MAP2K1/CALM3/CDK5/STAT1/SHC1
KEGG_RNA_POLYMERASE	KEGG_RNA_POLYMERASE	29	0.610423	2.13429	0.027027	0.241899	0.205007	8496	tags=86%, list=23%, signal=66%	POLR3G/POLR1E/ZNRD1/POLR1D/POLR2K/POLR2C/POLR3K/POLR1C/POLR2D/POLR2G/POLR1B/POLR2H/POLR2I/POLR3C/POLR2L/POLR2J/POLR2E/POLR3A/POLR3B/POLR3H/POLR1A/POLR3GL/POLR3D/POLR2A/POLR3F
REACTOME_CRISTAE_FORMATION	REACTOME_CRISTAE_FORMATION	29	0.770602	2.69434	0.027027	0.241899	0.205007	7862	tags=93%, list=21%, signal=73%	ATP5MF/HSPA9/ATP5MC3/ATP5MC2/ATP5PF/ATP5F1B/ATP5PO/ATP5PB/ATP5F1C/ATP5MC1/ATP5ME/MICOS13/ATP5PD/ATP5MG/CHCHD3/ATP5F1A/MTX2/ATP5F1E/CHCHD6/APOO/IMMT/TMEM11/MTX1/SAMM50/APOOL/ATP5F1D/DMAC2L
REACTOME_G1_S_SPECIFIC_TRANSCRIPTION	REACTOME_G1_S_SPECIFIC_TRANSCRIPTION	29	0.740217	2.58811	0.027027	0.241899	0.205007	4554	tags=59%, list=12%, signal=51%	RRM2/CDK1/CDT1/CDC25A/ORC1/TYMS/CDC6/TK1/PCNA/CDC45/DHFR/FBXO5/LIN9/CCNA1/CCNE1/E2F5/TFDP1
REACTOME_INTERCONVERSION_OF_NUCLEOTIDE_DI_AND_TRIPHOSPHATES	REACTOME_INTERCONVERSION_OF_NUCLEOTIDE_DI_AND_TRIPHOSPHATES	29	0.677288	2.36808	0.027027	0.241899	0.205007	4733	tags=66%, list=13%, signal=57%	RRM2/TXNRD1/NME1/AK4/TYMS/DCTPP1/NME2/DTYMK/AK2/GSR/RRM1/TXN/CTPS1/AK1/AK6/GLRX/DUT/NME4/DCTD
REACTOME_MRNA_CAPPING	REACTOME_MRNA_CAPPING	29	0.63896	2.23407	0.027027	0.241899	0.205007	9986	tags=90%, list=27%, signal=65%	CDK7/POLR2K/POLR2C/GTF2H5/GTF2H3/GTF2F2/POLR2D/POLR2G/POLR2H/POLR2I/GTF2H2/POLR2L/NCBP2/CCNH/GTF2F1/MNAT1/POLR2J/POLR2E/POLR2A/GTF2H1/ERCC2/RNGTT/ERCC3/POLR2B/SUPT5H/NCBP1
REACTOME_NEGATIVE_REGULATION_OF_FGFR3_SIGNALING	REACTOME_NEGATIVE_REGULATION_OF_FGFR3_SIGNALING	29	0.505734	1.76826	0.027027	0.241899	0.205007	3387	tags=24%, list=9%, signal=22%	FGF4/FGF5/FGF8/RPS27A/PPP2CA/UBA52/UBB
WP_GASTRIC_CANCER_NETWORK_1	WP_GASTRIC_CANCER_NETWORK_1	29	0.600894	2.10098	0.027027	0.241899	0.205007	3883	tags=59%, list=11%, signal=52%	UBE2C/E2F7/AURKA/TPX2/MCM4/ECT2/MYBL2/KIF15/TOP2A/ACTL6A/RUVBL1/S100P/KIF20B/LIN9/CCNA1/ESM1/CENPF
BIOCARTA_IGF1MTOR_PATHWAY	BIOCARTA_IGF1MTOR_PATHWAY	19	0.56479	1.78245	0.0277778	0.241899	0.205007	3914	tags=32%, list=11%, signal=28%	EIF2S3/EIF4EBP1/PPP2CA/EIF2S1/EIF2S2/EIF4E
BIOCARTA_MITOCHONDRIA_PATHWAY	BIOCARTA_MITOCHONDRIA_PATHWAY	19	0.579979	1.83039	0.0277778	0.241899	0.205007	9819	tags=63%, list=27%, signal=46%	DIABLO/BAK1/CASP6/DFFA/BID/CASP9/BAX/AIFM1/BIK/CASP3/ENDOG/CASP8
PID_HIF1A_PATHWAY	PID_HIF1A_PATHWAY	19	0.651265	2.05536	0.0277778	0.241899	0.205007	6349	tags=63%, list=17%, signal=52%	RACK1/ELOC/HSP90AA1/TP53/ELOB/RBX1/HIF1A/COPS5/EGLN1/EGLN3/CUL2/NAA10
REACTOME_METABOLISM_OF_COFACTORS	REACTOME_METABOLISM_OF_COFACTORS	19	0.672942	2.12378	0.0277778	0.241899	0.205007	9543	tags=79%, list=26%, signal=58%	DHFR/COQ3/COQ5/HSP90AA1/PDSS1/IDH1/SPR/COQ2/GCHFR/COQ9/NOS3/COQ6/PDSS2/PTS/GCH1
REACTOME_PLASMA_LIPOPROTEIN_ASSEMBLY	REACTOME_PLASMA_LIPOPROTEIN_ASSEMBLY	19	0.566498	1.78784	0.0277778	0.241899	0.205007	1708	tags=21%, list=5%, signal=20%	APOA4/APOC3/MTTP/APOA1
REACTOME_PROCESSING_OF_INTRONLESS_PRE_MRNAS	REACTOME_PROCESSING_OF_INTRONLESS_PRE_MRNAS	19	0.542039	1.71065	0.0277778	0.241899	0.205007	9986	tags=79%, list=27%, signal=57%	CPSF3/CPSF4/NCBP2/NUDT21/CPSF2/CSTF2/CSTF1/CSTF2T/CLP1/CSTF3/FIP1L1/SYMPK/CPSF7/PAPOLA/NCBP1
REACTOME_REGULATION_OF_TLR_BY_ENDOGENOUS_LIGAND	REACTOME_REGULATION_OF_TLR_BY_ENDOGENOUS_LIGAND	19	0.600578	1.8954	0.0277778	0.241899	0.205007	3742	tags=47%, list=10%, signal=43%	LBP/FGA/S100A9/FGB/SFTPA2/FGG/SFTPA1/HMGB1/S100A1
REACTOME_TICAM1_RIP1_MEDIATED_IKK_COMPLEX_RECRUITMENT	REACTOME_TICAM1_RIP1_MEDIATED_IKK_COMPLEX_RECRUITMENT	19	0.601166	1.89725	0.0277778	0.241899	0.205007	7470	tags=58%, list=20%, signal=46%	RPS27A/UBE2D2/UBE2N/UBA52/UBB/TLR3/UBE2D3/UBC/UBE2D1/TICAM1/CHUK
BIOCARTA_STATHMIN_PATHWAY	BIOCARTA_STATHMIN_PATHWAY	20	0.543281	1.71288	0.0289855	0.241899	0.205007	7259	tags=45%, list=20%, signal=36%	CCNB1/CDK1/STMN1/PRKAR1B/TSG101/HSPA5/MAPK13/PRKAR2A/CD3D
REACTOME_ABERRANT_REGULATION_OF_MITOTIC_EXIT_IN_CANCER_DUE_TO_RB1_DEFECTS	REACTOME_ABERRANT_REGULATION_OF_MITOTIC_EXIT_IN_CANCER_DUE_TO_RB1_DEFECTS	20	0.678421	2.13895	0.0289855	0.241899	0.205007	7993	tags=75%, list=22%, signal=59%	UBE2C/UBE2E1/UBE2S/CDC23/ANAPC11/ANAPC10/ANAPC16/ANAPC15/CDC26/SKP2/UBE2D1/ANAPC5/CDC27/RB1/ANAPC7
REACTOME_CLASS_I_PEROXISOMAL_MEMBRANE_PROTEIN_IMPORT	REACTOME_CLASS_I_PEROXISOMAL_MEMBRANE_PROTEIN_IMPORT	20	0.516494	1.62842	0.0289855	0.241899	0.205007	7152	tags=50%, list=20%, signal=40%	PEX2/FIS1/PXMP2/PEX19/ATAD1/PEX11B/PEX3/PEX12/GDAP1/ACBD5
REACTOME_CONVERSION_FROM_APC_C_CDC20_TO_APC_C_CDH1_IN_LATE_ANAPHASE	REACTOME_CONVERSION_FROM_APC_C_CDC20_TO_APC_C_CDH1_IN_LATE_ANAPHASE	20	0.630491	1.98784	0.0289855	0.241899	0.205007	7993	tags=70%, list=22%, signal=55%	UBE2C/CDC20/UBE2E1/UBE2S/CDC23/ANAPC11/ANAPC10/ANAPC16/ANAPC15/CDC26/UBE2D1/ANAPC5/CDC27/ANAPC7
REACTOME_FGFR2_LIGAND_BINDING_AND_ACTIVATION	REACTOME_FGFR2_LIGAND_BINDING_AND_ACTIVATION	20	0.520759	1.64187	0.0289855	0.241899	0.205007	298	tags=20%, list=1%, signal=20%	FGF4/FGF5/FGF8/FGFBP1
REACTOME_FRS_MEDIATED_FGFR3_SIGNALING	REACTOME_FRS_MEDIATED_FGFR3_SIGNALING	20	0.550572	1.73587	0.0289855	0.241899	0.205007	98	tags=15%, list=0%, signal=15%	FGF4/FGF5/FGF8
REACTOME_LISTERIA_MONOCYTOGENES_ENTRY_INTO_HOST_CELLS	REACTOME_LISTERIA_MONOCYTOGENES_ENTRY_INTO_HOST_CELLS	20	0.572278	1.8043	0.0289855	0.241899	0.205007	5897	tags=45%, list=16%, signal=38%	RPS27A/SH3GL2/MET/UBA52/UBB/CTNNB1/STAM/SH3KBP1/UBC
REACTOME_PI_3K_CASCADE_FGFR4	REACTOME_PI_3K_CASCADE_FGFR4	20	0.518964	1.63621	0.0289855	0.241899	0.205007	363	tags=15%, list=1%, signal=15%	FGF4/FGF8/FGF19
REACTOME_RIPK1_MEDIATED_REGULATED_NECROSIS	REACTOME_RIPK1_MEDIATED_REGULATED_NECROSIS	20	0.567728	1.78996	0.0289855	0.241899	0.205007	6821	tags=45%, list=19%, signal=37%	RPS27A/UBA52/TNFSF10/UBB/FAS/TNFRSF10A/FADD/UBC/TNFRSF10B
REACTOME_SHC_MEDIATED_CASCADE_FGFR4	REACTOME_SHC_MEDIATED_CASCADE_FGFR4	20	0.508203	1.60228	0.0289855	0.241899	0.205007	2379	tags=20%, list=6%, signal=19%	FGF4/FGF8/FGF19/KRAS
REACTOME_SUMOYLATION_OF_TRANSCRIPTION_FACTORS	REACTOME_SUMOYLATION_OF_TRANSCRIPTION_FACTORS	20	0.497767	1.56938	0.0289855	0.241899	0.205007	5873	tags=35%, list=16%, signal=29%	FOXL2/SUMO3/SUMO2/SUMO1/TP53/TFAP2A/UBE2I
WP_HEREDITARY_LEIOMYOMATOSIS_AND_RENAL_CELL_CARCINOMA_PATHWAY	WP_HEREDITARY_LEIOMYOMATOSIS_AND_RENAL_CELL_CARCINOMA_PATHWAY	20	0.611673	1.92851	0.0289855	0.241899	0.205007	5693	tags=45%, list=16%, signal=38%	RPS6/LDHA/SLC2A1/PRKAG1/PDHB/TP53/HIF1A/EGLN1/KEAP1
WP_NANOMATERIAL_INDUCED_APOPTOSIS	WP_NANOMATERIAL_INDUCED_APOPTOSIS	20	0.598599	1.88729	0.0289855	0.241899	0.205007	9819	tags=70%, list=27%, signal=51%	CYCS/DIABLO/FAS/BAK1/CASP6/HTRA2/FADD/BID/CASP9/BAX/AIFM1/CASP3/ENDOG/CASP8
BIOCARTA_FAS_PATHWAY	BIOCARTA_FAS_PATHWAY	30	0.52205	1.8654	0.0294118	0.241899	0.205007	11053	tags=77%, list=30%, signal=54%	LMNB1/FAS/RIPK2/PARP1/CASP6/DFFA/LMNB2/FADD/PRKDC/DAXX/PAK2/FAF1/RB1/MAP2K4/PTPN13/CASP3/CASP8/MAP3K7/PAK1/ARHGDIB/FASLG/LMNA/CASP7
REACTOME_ACTIVATION_OF_BH3_ONLY_PROTEINS	REACTOME_ACTIVATION_OF_BH3_ONLY_PROTEINS	30	0.520803	1.86094	0.0294118	0.241899	0.205007	7549	tags=47%, list=21%, signal=37%	PMAIP1/YWHAE/YWHAQ/YWHAZ/TP53/SFN/YWHAG/TFDP1/PPP3R1/DYNLL1/BID/YWHAB/E2F1/DYNLL2
REACTOME_FGFR1_MUTANT_RECEPTOR_ACTIVATION	REACTOME_FGFR1_MUTANT_RECEPTOR_ACTIVATION	30	0.518503	1.85272	0.0294118	0.241899	0.205007	98	tags=10%, list=0%, signal=10%	FGF4/FGF5/FGF8
REACTOME_FOXO_MEDIATED_TRANSCRIPTION_OF_OXIDATIVE_STRESS_METABOLIC_AND_NEURONAL_GENES	REACTOME_FOXO_MEDIATED_TRANSCRIPTION_OF_OXIDATIVE_STRESS_METABOLIC_AND_NEURONAL_GENES	30	0.526177	1.88015	0.0294118	0.241899	0.205007	94	tags=10%, list=0%, signal=10%	G6PC/IGFBP1/PCK1
REACTOME_RECOGNITION_OF_DNA_DAMAGE_BY_PCNA_CONTAINING_REPLICATION_COMPLEX	REACTOME_RECOGNITION_OF_DNA_DAMAGE_BY_PCNA_CONTAINING_REPLICATION_COMPLEX	30	0.770778	2.75416	0.0294118	0.241899	0.205007	6284	tags=77%, list=17%, signal=64%	RPS27A/RFC4/RFC3/DTL/POLE3/PCNA/RPA3/RFC5/UBA52/RFC2/UBE2B/POLE4/POLE2/POLD2/UBB/RBX1/RPA1/RPA2/RAD18/RFC1/UBC/USP1/DDB1
REACTOME_SYNTHESIS_OF_ACTIVE_UBIQUITIN_ROLES_OF_E1_AND_E2_ENZYMES	REACTOME_SYNTHESIS_OF_ACTIVE_UBIQUITIN_ROLES_OF_E1_AND_E2_ENZYMES	30	0.693287	2.47727	0.0294118	0.241899	0.205007	8550	tags=80%, list=23%, signal=61%	UBE2C/UBE2T/RPS27A/UBE2D2/UBE2E1/UBE2S/UBA52/UBE2B/UBB/UBE2A/USP5/UBE2K/UBE2E3/UBE2R2/UBC/UCHL3/UBE2Z/UBE2G1/UBE2D1/CDC34/UBE2Q2/UBE2W/UBA1/UBE2L3
WP_ONE_CARBON_METABOLISM	WP_ONE_CARBON_METABOLISM	30	0.642369	2.29532	0.0294118	0.241899	0.205007	5201	tags=57%, list=14%, signal=49%	MAT1A/BHMT/AHCY/SHMT2/MTHFD2/TYMS/MAT2B/DHFR/ATIC/GART/MTHFD1/MTRR/GLRX/MTHFD1L/AHCYL2/SHMT1/MTHFS
REACTOME_TGF_BETA_RECEPTOR_SIGNALING_IN_EMT_EPITHELIAL_TO_MESENCHYMAL_TRANSITION_	REACTOME_TGF_BETA_RECEPTOR_SIGNALING_IN_EMT_EPITHELIAL_TO_MESENCHYMAL_TRANSITION_	16	0.574567	1.68854	0.029703	0.241899	0.205007	10365	tags=69%, list=28%, signal=49%	RPS27A/UBA52/UBB/PARD3/RHOA/UBC/FKBP1A/TGFB1/F11R/SMURF1/TGFBR1
BIOCARTA_SET_PATHWAY	BIOCARTA_SET_PATHWAY	10	0.674378	1.82201	0.0301205	0.241899	0.205007	7400	tags=70%, list=20%, signal=56%	HMGB2/APEX1/SET/ANP32A/DFFA/GZMA/GZMB
REACTOME_HDR_THROUGH_MMEJ_ALT_NHEJ_	REACTOME_HDR_THROUGH_MMEJ_ALT_NHEJ_	10	0.688006	1.85883	0.0301205	0.241899	0.205007	9895	tags=90%, list=27%, signal=66%	FEN1/RAD50/NBN/PARP1/RBBP8/PARP2/LIG3/POLQ/XRCC1
REACTOME_ZINC_INFLUX_INTO_CELLS_BY_THE_SLC39_GENE_FAMILY	REACTOME_ZINC_INFLUX_INTO_CELLS_BY_THE_SLC39_GENE_FAMILY	10	0.686899	1.85584	0.0301205	0.241899	0.205007	8254	tags=60%, list=23%, signal=46%	SLC39A5/SLC39A2/SLC39A1/SLC39A10/SLC39A6/SLC39A8
BIOCARTA_MPR_PATHWAY	BIOCARTA_MPR_PATHWAY	21	0.528897	1.7035	0.030303	0.241899	0.205007	7786	tags=43%, list=21%, signal=34%	CCNB1/CDC25C/CDK1/PAQR5/PRKAR1B/MYT1/PRKAR2A/CAP1/PIN1
PID_P38_MK2_PATHWAY	PID_P38_MK2_PATHWAY	21	0.622428	2.00475	0.030303	0.241899	0.205007	7898	tags=57%, list=22%, signal=45%	TH/YWHAE/YWHAQ/MAPKAPK3/YWHAZ/SFN/YWHAG/HSPB1/ETV1/YWHAB/MAPK14/CDC25B
REACTOME_BRANCHED_CHAIN_AMINO_ACID_CATABOLISM	REACTOME_BRANCHED_CHAIN_AMINO_ACID_CATABOLISM	21	0.571506	1.84074	0.030303	0.241899	0.205007	8492	tags=67%, list=23%, signal=51%	BCAT1/MCCC2/ECHS1/HSD17B10/DLD/ACADSB/HIBADH/BCKDHA/ACAT1/IVD/DBT/ALDH6A1/AUH/BCKDK
REACTOME_INHIBITION_OF_THE_PROTEOLYTIC_ACTIVITY_OF_APC_C_REQUIRED_FOR_THE_ONSET_OF_ANAPHASE_BY_MITOTIC_SPINDLE_CHECKPOINT_COMPONENTS	REACTOME_INHIBITION_OF_THE_PROTEOLYTIC_ACTIVITY_OF_APC_C_REQUIRED_FOR_THE_ONSET_OF_ANAPHASE_BY_MITOTIC_SPINDLE_CHECKPOINT_COMPONENTS	21	0.71497	2.30282	0.030303	0.241899	0.205007	7993	tags=81%, list=22%, signal=63%	MAD2L1/UBE2C/CDC20/BUB1B/UBE2E1/UBE2S/BUB3/CDC23/ANAPC11/ANAPC10/ANAPC16/ANAPC15/CDC26/UBE2D1/ANAPC5/CDC27/ANAPC7
REACTOME_NEF_MEDIATES_DOWN_MODULATION_OF_CELL_SURFACE_RECEPTORS_BY_RECRUITING_THEM_TO_CLATHRIN_ADAPTERS	REACTOME_NEF_MEDIATES_DOWN_MODULATION_OF_CELL_SURFACE_RECEPTORS_BY_RECRUITING_THEM_TO_CLATHRIN_ADAPTERS	21	0.602063	1.93916	0.030303	0.241899	0.205007	7800	tags=57%, list=21%, signal=45%	AP1S1/AP1M2/AP2S1/AP2M1/B2M/AP1S2/AP2B1/ATP6V1H/AP1S3/CD8B/ARF1/HLA-A
REACTOME_PI_3K_CASCADE_FGFR1	REACTOME_PI_3K_CASCADE_FGFR1	21	0.517039	1.66531	0.030303	0.241899	0.205007	98	tags=14%, list=0%, signal=14%	FGF4/FGF5/FGF8
REACTOME_SHC_MEDIATED_CASCADE_FGFR1	REACTOME_SHC_MEDIATED_CASCADE_FGFR1	21	0.508006	1.63622	0.030303	0.241899	0.205007	98	tags=14%, list=0%, signal=14%	FGF4/FGF5/FGF8
WP_UREA_CYCLE_AND_ASSOCIATED_PATHWAYS	WP_UREA_CYCLE_AND_ASSOCIATED_PATHWAYS	21	0.507663	1.63511	0.030303	0.241899	0.205007	4167	tags=52%, list=11%, signal=46%	CPS1/LDHB/GOT1/SLC25A15/NAGS/ASS1/MDH1/MDH2/GOT2/FH/GLUD1
BIOCARTA_CASPASE_PATHWAY	BIOCARTA_CASPASE_PATHWAY	22	0.512793	1.68024	0.03125	0.241899	0.205007	11053	tags=73%, list=30%, signal=51%	LMNB1/PARP1/CASP6/DFFA/LMNB2/CASP4/GZMB/CASP9/CASP3/CASP8/CASP1/ARHGDIB/BIRC2/LMNA/CASP2/CASP7
KEGG_BIOSYNTHESIS_OF_UNSATURATED_FATTY_ACIDS	KEGG_BIOSYNTHESIS_OF_UNSATURATED_FATTY_ACIDS	22	0.655128	2.14662	0.03125	0.241899	0.205007	8224	tags=73%, list=22%, signal=56%	ELOVL2/BAAT/ELOVL6/ACOT4/HACD1/ACOT7/PECR/HADHA/SCD/FADS1/HSD17B12/TECR/ELOVL5/ACAA1/HACD2/ACOT2
KEGG_CITRATE_CYCLE_TCA_CYCLE	KEGG_CITRATE_CYCLE_TCA_CYCLE	31	0.744189	2.65599	0.03125	0.241899	0.205007	6951	tags=74%, list=19%, signal=60%	PCK1/OGDHL/MDH1/MDH2/SDHB/SDHC/SUCLG1/CS/PDHB/SUCLG2P2/FH/SUCLG2/IDH1/SUCLA2/DLST/DLD/SDHD/IDH3B/ACLY/DLAT/IDH3A/PCK2/PC
KEGG_GLYCINE_SERINE_AND_THREONINE_METABOLISM	KEGG_GLYCINE_SERINE_AND_THREONINE_METABOLISM	31	0.493558	1.76149	0.03125	0.241899	0.205007	5573	tags=42%, list=15%, signal=36%	AGXT2/BHMT/PSAT1/SHMT2/GAMT/PSPH/PHGDH/CTH/PIPOX/MAOA/DLD/SHMT1/CBS
PID_AURORA_A_PATHWAY	PID_AURORA_A_PATHWAY	31	0.610983	2.18058	0.03125	0.241899	0.205007	8037	tags=58%, list=22%, signal=45%	BIRC5/DLGAP5/AURKA/RAN/AURKB/CENPA/TPX2/GADD45A/TACC3/TP53/OAZ1/PPP2R5D/BRCA1/CKAP5/TDRD7/AURKAIP1/CDC25B/RASA1
REACTOME_CHAPERONE_MEDIATED_AUTOPHAGY	REACTOME_CHAPERONE_MEDIATED_AUTOPHAGY	22	0.6411	2.10065	0.03125	0.241899	0.205007	5897	tags=55%, list=16%, signal=46%	EEF1A1/RPS27A/HSP90AB1/HSPA8/UBA52/HSP90AA1/PLIN3/UBB/PARK7/PLIN2/VIM/UBC
REACTOME_CITRIC_ACID_CYCLE_TCA_CYCLE_	REACTOME_CITRIC_ACID_CYCLE_TCA_CYCLE_	22	0.635644	2.08278	0.03125	0.241899	0.205007	8344	tags=73%, list=23%, signal=56%	MDH2/SDHB/SDHC/SUCLG1/CS/FH/SUCLG2/SUCLA2/DLST/DLD/SDHD/IDH3B/IDH3A/FAHD1/ME2/SDHA
REACTOME_DNA_STRAND_ELONGATION	REACTOME_DNA_STRAND_ELONGATION	32	0.796446	2.86904	0.03125	0.241899	0.205007	5805	tags=81%, list=16%, signal=68%	GINS2/GINS4/PRIM1/GINS3/MCM7/MCM2/MCM4/RFC4/RFC3/GINS1/MCM6/PCNA/CDC45/RPA3/RFC5/RFC2/PRIM2/FEN1/POLD2/MCM3/RPA1/MCM5/RPA2/POLA2/DNA2/RFC1
REACTOME_E2F_MEDIATED_REGULATION_OF_DNA_REPLICATION	REACTOME_E2F_MEDIATED_REGULATION_OF_DNA_REPLICATION	22	0.714393	2.34081	0.03125	0.241899	0.205007	8299	tags=86%, list=23%, signal=67%	CCNB1/CDK1/PRIM1/ORC1/ORC6/PPP2CA/PRIM2/ORC5/TFDP1/POLA2/ORC3/ORC4/PPP2CB/E2F1/PPP2R1A/MCM8/RB1/POLA1/ORC2
REACTOME_EGFR_DOWNREGULATION	REACTOME_EGFR_DOWNREGULATION	31	0.508468	1.81471	0.03125	0.241899	0.205007	6432	tags=45%, list=18%, signal=37%	EREG/RPS27A/AREG/SH3GL2/TGFA/UBA52/UBB/CDC42/STAM/SPRY2/SH3KBP1/UBC/EGFR/HBEGF
REACTOME_ENDOSOMAL_SORTING_COMPLEX_REQUIRED_FOR_TRANSPORT_ESCRT_	REACTOME_ENDOSOMAL_SORTING_COMPLEX_REQUIRED_FOR_TRANSPORT_ESCRT_	31	0.610981	2.18057	0.03125	0.241899	0.205007	8217	tags=58%, list=22%, signal=45%	RPS27A/CHMP4C/UBA52/UBB/UBAP1/CHMP5/CHMP2B/TSG101/VPS25/STAM/MVB12A/VTA1/UBC/SNF8/VPS28/CHMP2A/CHMP3/VPS4B
REACTOME_FRS_MEDIATED_FGFR4_SIGNALING	REACTOME_FRS_MEDIATED_FGFR4_SIGNALING	22	0.488773	1.60153	0.03125	0.241899	0.205007	363	tags=14%, list=1%, signal=14%	FGF4/FGF8/FGF19
REACTOME_GLYOXYLATE_METABOLISM_AND_GLYCINE_DEGRADATION	REACTOME_GLYOXYLATE_METABOLISM_AND_GLYCINE_DEGRADATION	31	0.569182	2.03139	0.03125	0.241899	0.205007	6645	tags=52%, list=18%, signal=42%	AGXT2/HAO1/PRODH2/LIAS/GCSH/PDHB/NDUFAB1/GOT2/PXMP2/GRHPR/DLST/DLD/DLAT/HOGA1/BCKDHA/PDHX
REACTOME_HSF1_ACTIVATION	REACTOME_HSF1_ACTIVATION	31	0.656157	2.3418	0.03125	0.241899	0.205007	6638	tags=71%, list=18%, signal=58%	HSPA6/FKBP4/EEF1A1/PTGES3/HSP90AB1/YWHAE/RPA3/DNAJB1/HSPA1B/HSP90AA1/UBB/HSPA1A/HSBP1/RPA1/MRPL18/RPA2/HSPB1/HSF1/RLN1/SERPINH1/HSPH1/GML
REACTOME_INSERTION_OF_TAIL_ANCHORED_PROTEINS_INTO_THE_ENDOPLASMIC_RETICULUM_MEMBRANE	REACTOME_INSERTION_OF_TAIL_ANCHORED_PROTEINS_INTO_THE_ENDOPLASMIC_RETICULUM_MEMBRANE	22	0.65146	2.1346	0.03125	0.241899	0.205007	7586	tags=64%, list=21%, signal=50%	CAMLG/GET3/CYB5A/SEC61G/UBL4A/SERP1/SEC61B/GET1/EMD/VAPA/PRNP/BAG6/STX5/SGTA
REACTOME_JNK_C_JUN_KINASES_PHOSPHORYLATION_AND_ACTIVATION_MEDIATED_BY_ACTIVATED_HUMAN_TAK1	REACTOME_JNK_C_JUN_KINASES_PHOSPHORYLATION_AND_ACTIVATION_MEDIATED_BY_ACTIVATED_HUMAN_TAK1	22	0.496803	1.62785	0.03125	0.241899	0.205007	8751	tags=50%, list=24%, signal=38%	RPS27A/UBE2N/UBA52/UBB/MAPK9/RIPK2/IRAK2/UBC/MAP2K4/IRAK1/TAB2
REACTOME_NEGATIVE_REGULATION_OF_FGFR4_SIGNALING	REACTOME_NEGATIVE_REGULATION_OF_FGFR4_SIGNALING	31	0.465961	1.663	0.03125	0.241899	0.205007	6309	tags=35%, list=17%, signal=29%	FGF4/FGF8/FGF19/RPS27A/PPP2CA/UBA52/UBB/SPRY2/UBC/PPP2CB/PTPN11
REACTOME_PERK_REGULATES_GENE_EXPRESSION	REACTOME_PERK_REGULATES_GENE_EXPRESSION	32	0.655344	2.36075	0.03125	0.241899	0.205007	8968	tags=75%, list=24%, signal=57%	IGFBP1/ASNS/EIF2S3/EXOSC5/EIF2S1/EXOSC2/EIF2S2/EXOSC4/DDIT3/EXOSC7/EXOSC9/EXOSC1/NFYA/HSPA5/KHSRP/EXOSC8/ATF4/EXOSC3/CEBPG/PARN/ATF6/CCL2/DIS3/CXCL8
REACTOME_REGULATION_OF_GLUCOKINASE_BY_GLUCOKINASE_REGULATORY_PROTEIN	REACTOME_REGULATION_OF_GLUCOKINASE_BY_GLUCOKINASE_REGULATORY_PROTEIN	32	0.484432	1.74507	0.03125	0.241899	0.205007	10545	tags=78%, list=29%, signal=56%	NUP37/NUP35/NUP88/NDC1/SEH1L/RAE1/NUP54/NUP210/NUP153/NUP93/NUP107/SEC13/NUP205/NUP155/NUP133/NUP160/NUP43/NUP85/AAAS/NUP98/NUP62/POM121C/NUP58/POM121/GCK
REACTOME_RNA_POLYMERASE_I_TRANSCRIPTION_TERMINATION	REACTOME_RNA_POLYMERASE_I_TRANSCRIPTION_TERMINATION	31	0.626869	2.23727	0.03125	0.241899	0.205007	8403	tags=77%, list=23%, signal=60%	CDK7/POLR1E/ZNRD1/POLR1D/POLR2K/CD3EAP/GTF2H5/POLR1C/GTF2H3/TAF1B/POLR1B/POLR2H/GTF2H2/POLR2L/CCNH/MNAT1/TWISTNB/POLR2E/TTF1/TBP/POLR1A/GTF2H1/TAF1A/ERCC2
REACTOME_SMAD2_SMAD3_SMAD4_HETEROTRIMER_REGULATES_TRANSCRIPTION	REACTOME_SMAD2_SMAD3_SMAD4_HETEROTRIMER_REGULATES_TRANSCRIPTION	32	0.47318	1.70454	0.03125	0.241899	0.205007	9380	tags=53%, list=26%, signal=40%	MYC/RPS27A/UBA52/UBB/CCNC/WWTR1/E2F5/TFDP1/SNW1/UBC/TGIF2/CDK8/CCNK/E2F4/HDAC1/RBL1/TGIF1
REACTOME_TERMINATION_OF_TRANSLESION_DNA_SYNTHESIS	REACTOME_TERMINATION_OF_TRANSLESION_DNA_SYNTHESIS	32	0.69367	2.49881	0.03125	0.241899	0.205007	6474	tags=66%, list=18%, signal=54%	PCLAF/RPS27A/RFC4/RFC3/POLE3/PCNA/RPA3/RFC5/ISG15/UBA52/RFC2/POLE4/UBE2L6/POLE2/POLD2/UBB/RPA1/RPA2/RFC1/UBC/USP10
REACTOME_TGF_BETA_RECEPTOR_SIGNALING_ACTIVATES_SMADS	REACTOME_TGF_BETA_RECEPTOR_SIGNALING_ACTIVATES_SMADS	32	0.589839	2.12478	0.03125	0.241899	0.205007	7926	tags=50%, list=22%, signal=39%	RPS27A/BAMBI/STRAP/UBA52/PPP1CC/NEDD8/UBB/PPP1CA/UCHL5/PPP1CB/UBC/FURIN/UBE2M/FKBP1A/STUB1/XPO1
REACTOME_TRANSCRIPTIONAL_REGULATION_OF_PLURIPOTENT_STEM_CELLS	REACTOME_TRANSCRIPTIONAL_REGULATION_OF_PLURIPOTENT_STEM_CELLS	31	0.473803	1.69099	0.03125	0.241899	0.205007	358	tags=16%, list=1%, signal=16%	LIN28A/SALL1/DKK1/GSC/CDX2
WP_BASE_EXCISION_REPAIR	WP_BASE_EXCISION_REPAIR	31	0.67282	2.40127	0.03125	0.241899	0.205007	10396	tags=90%, list=28%, signal=65%	NEIL3/POLE3/UNG/PCNA/APEX1/POLE4/FEN1/POLB/HMGB1/POLE2/POLD2/MPG/TDG/PARP1/NEIL2/APEX2/PARP2/POLL/LIG3/OGG1/POLD1/POLD4/SMUG1/XRCC1/LIG1/MBD4/POLE/POLD3
WP_FATTY_ACID_BIOSYNTHESIS	WP_FATTY_ACID_BIOSYNTHESIS	22	0.480871	1.57564	0.03125	0.241899	0.205007	8301	tags=68%, list=23%, signal=53%	PECR/HADH/ECHS1/ACSL6/ACLY/ACSL4/SCD/ECHDC1/ACAA2/ECH1/DECR1/PC/MECR/ACSL3/ECHDC3
WP_GASTRIC_CANCER_NETWORK_2	WP_GASTRIC_CANCER_NETWORK_2	31	0.604316	2.15678	0.03125	0.241899	0.205007	5919	tags=68%, list=16%, signal=57%	UBE2C/MYC/UBE2T/DSCC1/CACYBP/RFC4/RFC3/TOP2A/ATAD2/BRIX1/FANCI/S100A6/TP53/CTNNB1/CEBPZ/MTDH/CD48/LMNB2/CHTF8/RAD17/EGFR
WP_METHIONINE_DE_NOVO_AND_SALVAGE_PATHWAY	WP_METHIONINE_DE_NOVO_AND_SALVAGE_PATHWAY	22	0.659366	2.16051	0.03125	0.241899	0.205007	8409	tags=68%, list=23%, signal=53%	MAT1A/BHMT/AHCY/ODC1/MAT2B/TXN/SMS/AMD1/ENOPH1/SRM/ADI1/MTAP/MSRB2/MSRA/APIP
WP_MITOCHONDRIAL_CIV_ASSEMBLY	WP_MITOCHONDRIAL_CIV_ASSEMBLY	31	0.788352	2.8136	0.03125	0.241899	0.205007	6246	tags=87%, list=17%, signal=72%	COX7C/HIGD1A/COX7B/NDUFA4/COX7A2/COX5A/COX6B1/COX14/COA6/SMIM20/COA3/COX6A1/COX11/COX16/TACO1/COX4I1/SURF1/COX5B/CMC1/COX17/COX15/TMEM177/COX6C/COX8A/COX18/PET100/COX10
WP_PI3KAKTMTOR_VITD3_SIGNALLING	WP_PI3KAKTMTOR_VITD3_SIGNALLING	22	0.53018	1.73721	0.03125	0.241899	0.205007	4613	tags=27%, list=13%, signal=24%	MYC/LDHA/CYP24A1/SLC2A3/PFKFB4/HLA-DRA
WP_PURINE_METABOLISM_AND_RELATED_DISORDERS	WP_PURINE_METABOLISM_AND_RELATED_DISORDERS	22	0.526031	1.72362	0.03125	0.241899	0.205007	6239	tags=64%, list=17%, signal=53%	PAICS/PNP/HPRT1/ADSL/ATIC/GART/ADA/PPAT/PRPS1/APRT/TPMT/XDH/DGUOK/RRM2B
WP_REGULATION_OF_APOPTOSIS_BY_PARATHYROID_HORMONERELATED_PROTEIN	WP_REGULATION_OF_APOPTOSIS_BY_PARATHYROID_HORMONERELATED_PROTEIN	22	0.496949	1.62832	0.03125	0.241899	0.205007	8710	tags=55%, list=24%, signal=42%	MYC/PTHLH/BAK1/BCL2L10/BID/ITGA6/BCL2L12/BOK/BCL2L1/BCL2L13/BAX/GSK3A
WP_TRANSSULFURATION_AND_ONE_CARBON_METABOLISM	WP_TRANSSULFURATION_AND_ONE_CARBON_METABOLISM	31	0.671758	2.39748	0.03125	0.241899	0.205007	5573	tags=61%, list=15%, signal=52%	MAT1A/BHMT/AHCY/PSAT1/SHMT2/MTHFD2/TYMS/MAT2B/DHFR/GCLC/MTHFD1/PSPH/PHGDH/CTH/GCLM/MTHFD1L/AHCYL2/SHMT1/CBS
REACTOME_FGFR3_LIGAND_BINDING_AND_ACTIVATION	REACTOME_FGFR3_LIGAND_BINDING_AND_ACTIVATION	13	0.642599	1.78109	0.0330579	0.241899	0.205007	98	tags=23%, list=0%, signal=23%	FGF4/FGF5/FGF8
REACTOME_TELOMERE_C_STRAND_SYNTHESIS_INITIATION	REACTOME_TELOMERE_C_STRAND_SYNTHESIS_INITIATION	13	0.645336	1.78867	0.0330579	0.241899	0.205007	9002	tags=77%, list=25%, signal=58%	PRIM1/STN1/PRIM2/POLA2/POT1/TINF2/TERF1/POLA1/TERF2/TEN1
BIOCARTA_NDKDYNAMIN_PATHWAY	BIOCARTA_NDKDYNAMIN_PATHWAY	17	0.541874	1.63961	0.0333333	0.241899	0.205007	7194	tags=47%, list=20%, signal=38%	NME1/NME2/NME1-NME2/CALM2/AP2M1/CALM3/PPP3CB/PPP3CA
KEGG_ONE_CARBON_POOL_BY_FOLATE	KEGG_ONE_CARBON_POOL_BY_FOLATE	17	0.542204	1.64061	0.0333333	0.241899	0.205007	5201	tags=59%, list=14%, signal=50%	SHMT2/MTHFD2/TYMS/DHFR/ATIC/GART/MTHFD1/MTHFD1L/SHMT1/MTHFS
REACTOME_BETA_CATENIN_PHOSPHORYLATION_CASCADE	REACTOME_BETA_CATENIN_PHOSPHORYLATION_CASCADE	17	0.535273	1.61963	0.0333333	0.241899	0.205007	7487	tags=59%, list=20%, signal=47%	PPP2CA/CSNK1A1/CTNNB1/PPP2R5D/PPP2R5A/PPP2CB/PPP2R5E/PPP2R5C/FRAT2/PPP2R1A
REACTOME_BUTYRATE_RESPONSE_FACTOR_1_BRF1_BINDS_AND_DESTABILIZES_MRNA	REACTOME_BUTYRATE_RESPONSE_FACTOR_1_BRF1_BINDS_AND_DESTABILIZES_MRNA	17	0.55853	1.69001	0.0333333	0.241899	0.205007	6106	tags=53%, list=17%, signal=44%	EXOSC5/EXOSC2/EXOSC4/EXOSC7/EXOSC9/EXOSC1/EXOSC8/YWHAB/EXOSC3
REACTOME_METABOLISM_OF_FOLATE_AND_PTERINES	REACTOME_METABOLISM_OF_FOLATE_AND_PTERINES	17	0.546896	1.6548	0.0333333	0.241899	0.205007	7488	tags=59%, list=20%, signal=47%	SHMT2/MTHFD2/DHFR/FOLR2/MTHFD1/MTHFD1L/SHMT1/MTHFS/SLC25A32/FPGS
REACTOME_TRISTETRAPROLIN_TTP_ZFP36_BINDS_AND_DESTABILIZES_MRNA	REACTOME_TRISTETRAPROLIN_TTP_ZFP36_BINDS_AND_DESTABILIZES_MRNA	17	0.521814	1.57891	0.0333333	0.241899	0.205007	7750	tags=65%, list=21%, signal=51%	EXOSC5/EXOSC2/EXOSC4/EXOSC7/EXOSC9/EXOSC1/EXOSC8/YWHAB/EXOSC3/TNPO1/DCP1A
REACTOME_ZINC_TRANSPORTERS	REACTOME_ZINC_TRANSPORTERS	17	0.536997	1.62485	0.0333333	0.241899	0.205007	9051	tags=65%, list=25%, signal=49%	SLC39A5/SLC30A2/SLC39A2/SLC30A5/SLC39A1/SLC39A10/SLC30A6/SLC39A6/SLC39A8/SLC30A3/SLC30A1
PID_SYNDECAN_2_PATHWAY	PID_SYNDECAN_2_PATHWAY	33	0.527572	1.96931	0.0344828	0.241899	0.205007	9637	tags=61%, list=26%, signal=45%	KNG1/CSF2/RACK1/ITGA5/LAMA1/RHOA/ITGB1/ITGA2/EPHB2/TRAPPC4/CAV2/RASA1/BAX/LAMA3/SDC2/PRKACA/CXCL8/CASP3/TGFB1/SDCBP
REACTOME_ACTIVATION_OF_THE_PRE_REPLICATIVE_COMPLEX	REACTOME_ACTIVATION_OF_THE_PRE_REPLICATIVE_COMPLEX	33	0.738135	2.7553	0.0344828	0.241899	0.205007	5826	tags=85%, list=16%, signal=71%	CDT1/MCM10/PRIM1/GMNN/MCM7/MCM2/ORC1/MCM4/CDC6/ORC6/POLE3/MCM6/CDC45/RPA3/PRIM2/POLE4/DBF4/POLE2/CDK2/MCM3/ORC5/RPA1/MCM5/RPA2/CDC7/POLA2/ORC3/ORC4
REACTOME_COOPERATION_OF_PREFOLDIN_AND_TRIC_CCT_IN_ACTIN_AND_TUBULIN_FOLDING	REACTOME_COOPERATION_OF_PREFOLDIN_AND_TRIC_CCT_IN_ACTIN_AND_TUBULIN_FOLDING	33	0.5968	2.22773	0.0344828	0.241899	0.205007	3928	tags=58%, list=11%, signal=51%	TUBA3C/CCT4/TUBA1C/CCT2/TUBA1B/CCT5/PFDN1/CCT8/PFDN5/CCT7/CCT3/CCT6A/PFDN4/VBP1/TUBA4A/TCP1/TUBA3E/PFDN6/PFDN2
REACTOME_EXPORT_OF_VIRAL_RIBONUCLEOPROTEINS_FROM_NUCLEUS	REACTOME_EXPORT_OF_VIRAL_RIBONUCLEOPROTEINS_FROM_NUCLEUS	33	0.674841	2.51904	0.0344828	0.241899	0.205007	10443	tags=82%, list=29%, signal=59%	RAN/NUP37/NUP35/NUP88/HSPA1A/NDC1/SEH1L/RAE1/NUP54/NUP210/NUP153/NUP93/NUP107/SEC13/NUP205/NUP155/NUP133/XPO1/NUP160/NUP43/NUP85/AAAS/NUP98/NUP62/POM121C/NUP58/POM121
REACTOME_FORMATION_OF_THE_EARLY_ELONGATION_COMPLEX	REACTOME_FORMATION_OF_THE_EARLY_ELONGATION_COMPLEX	33	0.645098	2.40801	0.0344828	0.241899	0.205007	9986	tags=91%, list=27%, signal=66%	CDK7/SUPT4H1/POLR2K/NELFE/POLR2C/GTF2H5/GTF2H3/GTF2F2/POLR2D/POLR2G/POLR2H/POLR2I/GTF2H2/POLR2L/NCBP2/CCNH/GTF2F1/MNAT1/POLR2J/POLR2E/NELFA/NELFCD/POLR2A/GTF2H1/ERCC2/ERCC3/POLR2B/SUPT5H/NELFB/NCBP1
REACTOME_GLUCONEOGENESIS	REACTOME_GLUCONEOGENESIS	33	0.546406	2.03962	0.0344828	0.241899	0.205007	3614	tags=42%, list=10%, signal=38%	G6PC/PCK1/GAPDH/PGK1/PGAM1/TPI1/GOT1/ENO1/ALDOA/MDH1/MDH2/GOT2/ALDOC/GPI
REACTOME_HIV_ELONGATION_ARREST_AND_RECOVERY	REACTOME_HIV_ELONGATION_ARREST_AND_RECOVERY	33	0.477235	1.78142	0.0344828	0.241899	0.205007	8277	tags=67%, list=23%, signal=52%	ELOC/SUPT4H1/POLR2K/NELFE/POLR2C/SSRP1/ELOB/GTF2F2/TCEA1/POLR2D/POLR2G/POLR2H/POLR2I/SUPT16H/POLR2L/GTF2F1/POLR2J/POLR2E/NELFA/NELFCD/CCNK/POLR2A
REACTOME_NUCLEAR_IMPORT_OF_REV_PROTEIN	REACTOME_NUCLEAR_IMPORT_OF_REV_PROTEIN	33	0.675072	2.5199	0.0344828	0.241899	0.205007	10443	tags=82%, list=29%, signal=59%	RAN/NUP37/NUP35/NUP88/NDC1/SEH1L/RAE1/KPNB1/NUP54/NUP210/NUP153/RCC1/NUP93/NUP107/SEC13/NUP205/NUP155/NUP133/NUP160/NUP43/NUP85/AAAS/NUP98/NUP62/POM121C/NUP58/POM121
BIOCARTA_SM_PATHWAY	BIOCARTA_SM_PATHWAY	14	0.603151	1.70805	0.0350877	0.241899	0.205007	7634	tags=86%, list=21%, signal=68%	SNRPD2/SNRPG/SNRPE/SNRPC/SNRPD1/SNRPB/SNRPF/SNRPB2/SNRPA/SNRPA1/SNRPD3/SRSF2
REACTOME_METHYLATION	REACTOME_METHYLATION	14	0.601032	1.70205	0.0350877	0.241899	0.205007	5028	tags=64%, list=14%, signal=55%	MAT1A/AHCY/GSTO1/MAT2B/NNMT/MTRR/TRMT112/AS3MT/TPMT
WP_TAMOXIFEN_METABOLISM	WP_TAMOXIFEN_METABOLISM	21	-0.688177	-1.40379	0.0352564	0.241899	0.205007	8204	tags=67%, list=22%, signal=52%	CYP2D6/CYP2E1/CYP2C8/CYP1A1/UGT1A8/CYP3A4/UGT1A4/CYP2C19/SULT1E1/CYP1A2/CYP2C9/CYP3A5/UGT2B15/UGT1A10
BIOCARTA_CELLCYCLE_PATHWAY	BIOCARTA_CELLCYCLE_PATHWAY	23	0.638249	2.14548	0.0357143	0.241899	0.205007	8051	tags=70%, list=22%, signal=54%	CCNB1/CDK1/CDK7/CDC25A/CDK4/CCNA1/CDK2/CCNE1/TFDP1/CCND3/CDKN1A/CCNH/E2F1/CDKN1B/RB1/CCND1
BIOCARTA_INTRINSIC_PATHWAY	BIOCARTA_INTRINSIC_PATHWAY	23	0.524675	1.7637	0.0357143	0.241899	0.205007	1471	tags=26%, list=4%, signal=25%	KNG1/F2/FGA/F12/FGB/FGG
KEGG_MISMATCH_REPAIR	KEGG_MISMATCH_REPAIR	23	0.636817	2.14067	0.0357143	0.241899	0.205007	5858	tags=70%, list=16%, signal=58%	EXO1/RFC4/RFC3/PCNA/RPA3/RFC5/SSBP1/RFC2/POLD2/MSH2/RPA1/RPA2/MLH1/MSH6/RFC1/MSH3
PID_PRL_SIGNALING_EVENTS_PATHWAY	PID_PRL_SIGNALING_EVENTS_PATHWAY	23	0.599968	2.0168	0.0357143	0.241899	0.205007	8915	tags=61%, list=24%, signal=46%	CCNA2/TUBA1B/CDK2/CCNE1/RHOC/CDKN1A/RHOA/ITGB1/ATF5/PTP4A1/RABGGTB/RABGGTA/RAC1/EGR1
REACTOME_ABORTIVE_ELONGATION_OF_HIV_1_TRANSCRIPT_IN_THE_ABSENCE_OF_TAT	REACTOME_ABORTIVE_ELONGATION_OF_HIV_1_TRANSCRIPT_IN_THE_ABSENCE_OF_TAT	23	0.617173	2.07463	0.0357143	0.241899	0.205007	9986	tags=91%, list=27%, signal=66%	SUPT4H1/POLR2K/NELFE/POLR2C/GTF2F2/POLR2D/POLR2G/POLR2H/POLR2I/POLR2L/NCBP2/GTF2F1/POLR2J/POLR2E/NELFA/NELFCD/POLR2A/POLR2B/SUPT5H/NELFB/NCBP1
REACTOME_ACTIVATED_TAK1_MEDIATES_P38_MAPK_ACTIVATION	REACTOME_ACTIVATED_TAK1_MEDIATES_P38_MAPK_ACTIVATION	23	0.533401	1.79303	0.0357143	0.241899	0.205007	8751	tags=52%, list=24%, signal=40%	RPS27A/UBE2N/UBA52/MAPKAPK3/UBB/RIPK2/IRAK2/UBC/MAP2K6/MAPK14/IRAK1/TAB2
REACTOME_BBSOME_MEDIATED_CARGO_TARGETING_TO_CILIUM	REACTOME_BBSOME_MEDIATED_CARGO_TARGETING_TO_CILIUM	23	0.517519	1.73965	0.0357143	0.241899	0.205007	7006	tags=48%, list=19%, signal=39%	CCT4/CCT2/CCT5/CCT8/CCT3/TCP1/BBS10/MKKS/BBS12/MCHR1/BBS7
REACTOME_DOWNREGULATION_OF_SMAD2_3_SMAD4_TRANSCRIPTIONAL_ACTIVITY	REACTOME_DOWNREGULATION_OF_SMAD2_3_SMAD4_TRANSCRIPTIONAL_ACTIVITY	23	0.480331	1.61464	0.0357143	0.241899	0.205007	7070	tags=35%, list=19%, signal=28%	RPS27A/UBA52/UBB/UBE2D3/PARP1/UBC/TGIF2/UBE2D1
REACTOME_FRS_MEDIATED_FGFR1_SIGNALING	REACTOME_FRS_MEDIATED_FGFR1_SIGNALING	23	0.491936	1.65365	0.0357143	0.241899	0.205007	98	tags=13%, list=0%, signal=13%	FGF4/FGF5/FGF8
REACTOME_IKK_COMPLEX_RECRUITMENT_MEDIATED_BY_RIP1	REACTOME_IKK_COMPLEX_RECRUITMENT_MEDIATED_BY_RIP1	23	0.47985	1.61302	0.0357143	0.241899	0.205007	7982	tags=52%, list=22%, signal=41%	RPS27A/UBE2D2/UBE2N/UBA52/UBB/UBE2D3/LY96/UBC/UBE2D1/TICAM1/CHUK/CD14
REACTOME_MITOCHONDRIAL_CALCIUM_ION_TRANSPORT	REACTOME_MITOCHONDRIAL_CALCIUM_ION_TRANSPORT	23	0.63833	2.14575	0.0357143	0.241899	0.205007	7233	tags=65%, list=20%, signal=52%	PHB2/VDAC2/VDAC1/STOML2/VDAC3/PHB/PMPCB/MAIP1/MCUB/PARL/MICU2/YME1L1/LETM1/SMDT1/PMPCA
REACTOME_MTORC1_MEDIATED_SIGNALLING	REACTOME_MTORC1_MEDIATED_SIGNALLING	23	0.685468	2.30421	0.0357143	0.241899	0.205007	7368	tags=61%, list=20%, signal=49%	RPS6/EIF4B/EIF4EBP1/LAMTOR4/LAMTOR5/EIF4E/RHEB/LAMTOR1/LAMTOR2/LAMTOR3/YWHAB/EIF4G1/RRAGA/MLST8
REACTOME_NUCLEOTIDE_SALVAGE	REACTOME_NUCLEOTIDE_SALVAGE	23	0.526315	1.76921	0.0357143	0.241899	0.205007	6897	tags=65%, list=19%, signal=53%	CDA/ADK/TK1/PNP/HPRT1/GMPR/ADA/DCK/APRT/GMPR2/UCK2/UPP1/DGUOK/ADAL/PUDP
REACTOME_RESPONSE_OF_MTB_TO_PHAGOCYTOSIS	REACTOME_RESPONSE_OF_MTB_TO_PHAGOCYTOSIS	23	0.506666	1.70316	0.0357143	0.241899	0.205007	9020	tags=57%, list=25%, signal=43%	PGK1/RPS27A/ENO1/UBA52/UBB/KPNB1/RAB7A/UBC/ATP6V1H/GSK3A/TRIM27/RAB5A/DUSP16
REACTOME_RNA_POLYMERASE_III_TRANSCRIPTION_TERMINATION	REACTOME_RNA_POLYMERASE_III_TRANSCRIPTION_TERMINATION	23	0.498001	1.67403	0.0357143	0.241899	0.205007	9289	tags=78%, list=25%, signal=58%	POLR3G/POLR1D/POLR2K/POLR3K/POLR1C/SSB/POLR2H/POLR3C/POLR2L/POLR2E/POLR3A/POLR3B/POLR3H/POLR3GL/POLR3D/POLR3F/CRCP/NFIC
REACTOME_TELOMERE_EXTENSION_BY_TELOMERASE	REACTOME_TELOMERE_EXTENSION_BY_TELOMERASE	23	0.709889	2.3863	0.0357143	0.241899	0.205007	6607	tags=65%, list=18%, signal=53%	CCNA2/NHP2/RUVBL1/NOP10/CCNA1/DKC1/CDK2/GAR1/TERT/RUVBL2/POT1/PPP6C/TINF2/TERF1/SHQ1
WP_UNFOLDED_PROTEIN_RESPONSE	WP_UNFOLDED_PROTEIN_RESPONSE	23	0.530351	1.78278	0.0357143	0.241899	0.205007	6821	tags=43%, list=19%, signal=35%	PMAIP1/EIF2S1/TP53/DDIT3/MBTPS2/HSPA5/RTCB/BID/ATF4/TNFRSF10B
PID_ATM_PATHWAY	PID_ATM_PATHWAY	34	0.597347	2.19641	0.037037	0.241899	0.205007	7964	tags=68%, list=22%, signal=53%	CDC25C/CDC25A/UBE2N/XRCC4/ABRAXAS1/UIMC1/FANCD2/RAD50/NBN/SMC3/BLM/RBBP8/BRCA1/RAD17/RNF8/BID/TRIM28/YWHAB/KAT5/MDC1/H2AX/CHEK2/COP1
REACTOME_DISEASES_OF_CARBOHYDRATE_METABOLISM	REACTOME_DISEASES_OF_CARBOHYDRATE_METABOLISM	34	0.52081	1.91499	0.037037	0.241899	0.205007	3387	tags=24%, list=9%, signal=21%	G6PC/LCT/RPS27A/GBE1/GYS2/UBA52/GYG1/UBB
REACTOME_LATE_ENDOSOMAL_MICROAUTOPHAGY	REACTOME_LATE_ENDOSOMAL_MICROAUTOPHAGY	34	0.535715	1.96979	0.037037	0.241899	0.205007	7788	tags=50%, list=21%, signal=39%	RPS27A/CHMP4C/HSPA8/UBA52/PLIN3/UBB/UBAP1/PARK7/CHMP2B/PLIN2/TSG101/MVB12A/VIM/UBC/VPS28/CHMP2A/CHMP3
REACTOME_NEGATIVE_REGULATORS_OF_DDX58_IFIH1_SIGNALING	REACTOME_NEGATIVE_REGULATORS_OF_DDX58_IFIH1_SIGNALING	34	0.482667	1.77473	0.037037	0.241899	0.205007	5897	tags=41%, list=16%, signal=35%	RPS27A/UBE2D2/ISG15/UBA52/UBE2L6/UBB/PCBP2/IFIH1/UBE2D3/UBE2K/HERC5/ATG5/ATG12/UBC
REACTOME_PHOSPHOLIPASE_C_MEDIATED_CASCADE_FGFR2	REACTOME_PHOSPHOLIPASE_C_MEDIATED_CASCADE_FGFR2	18	0.497788	1.54924	0.037037	0.241899	0.205007	98	tags=17%, list=0%, signal=17%	FGF4/FGF5/FGF8
REACTOME_TELOMERE_C_STRAND_LAGGING_STRAND_SYNTHESIS	REACTOME_TELOMERE_C_STRAND_LAGGING_STRAND_SYNTHESIS	34	0.687276	2.52707	0.037037	0.241899	0.205007	6333	tags=65%, list=17%, signal=54%	PRIM1/DSCC1/RFC4/RFC3/PCNA/RPA3/RFC5/STN1/RFC2/PRIM2/FEN1/POLD2/RPA1/RPA2/BLM/POLA2/POT1/CHTF8/DNA2/RFC1/TINF2/TERF1
REACTOME_TRANSCRIPTIONAL_REGULATION_BY_E2F6	REACTOME_TRANSCRIPTIONAL_REGULATION_BY_E2F6	34	0.535579	1.96929	0.037037	0.241899	0.205007	8796	tags=59%, list=24%, signal=45%	RRM2/RAD51/UXT/CHEK1/CBX3/PCGF6/TFDP1/RNF2/RBBP7/CDC7/RBBP8/BRCA1/RBBP4/E2F6/EZH2/E2F1/BMI1/SUZ12/MAX/EHMT2
BIOCARTA_G2_PATHWAY	BIOCARTA_G2_PATHWAY	24	0.637567	2.20023	0.0377358	0.241899	0.205007	7898	tags=67%, list=22%, signal=52%	CCNB1/CDC25C/CDK1/PLK1/CDC25A/YWHAQ/GADD45A/CHEK1/TP53/CDKN1A/BRCA1/MYT1/PRKDC/CDC34/CHEK2/CDC25B
BIOCARTA_VDR_PATHWAY	BIOCARTA_VDR_PATHWAY	24	0.478249	1.65042	0.0377358	0.241899	0.205007	10000	tags=58%, list=27%, signal=42%	ACTL6A/COPS2/PRMT1/SMARCC1/SUPT16H/CHAF1A/CARM1/SMARCD1/VDR/SMARCA4/HDAC1/SMARCE1/MED1/SMARCC2
KEGG_PROTEIN_EXPORT	KEGG_PROTEIN_EXPORT	24	0.664478	2.29309	0.0377358	0.241899	0.205007	9440	tags=88%, list=26%, signal=65%	SRP72/SEC61G/OXA1L/SPCS1/SRP19/SRP9P1/SEC11A/SRPRB/SRP9/SRP14/HSPA5/SRP68/SEC61B/IMMP2L/SEC62/SEC61A1/SPCS3/SRP54/SPCS2/IMMP1L/SEC63
REACTOME_DARPP_32_EVENTS	REACTOME_DARPP_32_EVENTS	24	0.592592	2.04502	0.0377358	0.241899	0.205007	9726	tags=75%, list=27%, signal=55%	PPP1R1B/PPP2CA/PRKAR1B/PPP1CA/PPP3R1/PDE4D/CDK5/PPP2R5D/PPP3CB/PPP2CB/PRKAR2A/PDE4C/PPP3CA/PPP2R1A/PRKAR1A/PRKACA/PDE4A/PRKACB
REACTOME_DISEASES_OF_PROGRAMMED_CELL_DEATH	REACTOME_DISEASES_OF_PROGRAMMED_CELL_DEATH	24	0.494515	1.70656	0.0377358	0.241899	0.205007	8609	tags=58%, list=24%, signal=45%	CDC25C/C1QBP/LMNB1/CDC25A/PRDX2/YWHAE/PRDX1/CAST/CDK5/CAPN1/CAPNS1/CDC25B/CDK5R1/APP
REACTOME_TRIGLYCERIDE_CATABOLISM	REACTOME_TRIGLYCERIDE_CATABOLISM	24	0.522371	1.80269	0.0377358	0.241899	0.205007	4178	tags=42%, list=11%, signal=37%	FABP7/FABP1/PNPLA5/FABP6/FABP5/PLIN3/PPP1CC/FABP3/PNPLA4/PPP1CA
WP_IL1_AND_MEGAKARYOCYTES_IN_OBESITY	WP_IL1_AND_MEGAKARYOCYTES_IN_OBESITY	24	0.46711	1.61198	0.0377358	0.241899	0.205007	1176	tags=12%, list=3%, signal=12%	F2/S100A9/FCER1A
KEGG_DNA_REPLICATION	KEGG_DNA_REPLICATION	36	0.707412	2.7164	0.0384615	0.241899	0.205007	6306	tags=78%, list=17%, signal=64%	PRIM1/MCM7/MCM2/MCM4/RNASEH2A/RFC4/RFC3/POLE3/MCM6/PCNA/RPA3/RFC5/SSBP1/RFC2/PRIM2/POLE4/FEN1/POLE2/POLD2/MCM3/RNASEH1/RPA1/MCM5/RPA2/POLA2/DNA2/RFC1/RNASEH2B
REACTOME_DISEASES_OF_MITOTIC_CELL_CYCLE	REACTOME_DISEASES_OF_MITOTIC_CELL_CYCLE	36	0.663126	2.54635	0.0384615	0.241899	0.205007	8051	tags=75%, list=22%, signal=59%	UBE2C/UBE2E1/UBE2S/CDK4/CDC23/CDK2/CCNE1/ANAPC11/ANAPC10/TFDP1/CCND3/CDKN1A/ANAPC16/ANAPC15/CDC26/CCNE2/SKP2/E2F2/UBE2D1/ANAPC5/E2F1/CDC27/E2F3/CDKN1B/RB1/ANAPC7/CCND1
REACTOME_INTERACTIONS_OF_REV_WITH_HOST_CELLULAR_PROTEINS	REACTOME_INTERACTIONS_OF_REV_WITH_HOST_CELLULAR_PROTEINS	36	0.678695	2.60613	0.0384615	0.241899	0.205007	10443	tags=83%, list=29%, signal=60%	RAN/NUP37/NUP35/NUP88/RANBP1/NDC1/SEH1L/RAE1/KPNB1/NUP54/NUP210/NUP153/RCC1/NUP93/NUP107/SEC13/NUP205/NUP155/NUP133/XPO1/RANGAP1/NUP160/NUP43/NUP85/AAAS/NUP98/NUP62/POM121C/NUP58/POM121
REACTOME_NOD1_2_SIGNALING_PATHWAY	REACTOME_NOD1_2_SIGNALING_PATHWAY	36	0.430762	1.65409	0.0384615	0.241899	0.205007	8751	tags=44%, list=24%, signal=34%	RPS27A/UBE2N/UBA52/UBB/RIPK2/IRAK2/AAMP/UBC/CASP4/MAPK13/MAP2K6/CASP9/CHUK/MAPK14/IRAK1/TAB2
REACTOME_NUCLEAR_PORE_COMPLEX_NPC_DISASSEMBLY	REACTOME_NUCLEAR_PORE_COMPLEX_NPC_DISASSEMBLY	36	0.659751	2.53339	0.0384615	0.241899	0.205007	10537	tags=78%, list=29%, signal=55%	CCNB1/CCNB2/CDK1/NUP37/NUP35/NUP88/NDC1/SEH1L/RAE1/NUP54/NUP210/NUP153/NUP93/NUP107/SEC13/NUP205/NUP155/NUP133/NUP160/NUP43/NUP85/AAAS/NUP98/NUP62/POM121C/NUP58/POM121/NEK6
REACTOME_RHO_GTPASES_ACTIVATE_WASPS_AND_WAVES	REACTOME_RHO_GTPASES_ACTIVATE_WASPS_AND_WAVES	36	0.582071	2.2351	0.0384615	0.241899	0.205007	8662	tags=61%, list=24%, signal=47%	ARPC1A/ACTG1/ARPC3/BRK1/ARPC4/WASF1/CDC42/ARPC5/NCK1/ARPC2/ACTR2/ACTR3/CYFIP2/ACTB/ARPC1B/CYFIP1/ABI1/BAIAP2/NCKAP1/RAC1/WASL/NCKIPSD
REACTOME_TRANSPORT_OF_THE_SLBP_DEPENDANT_MATURE_MRNA	REACTOME_TRANSPORT_OF_THE_SLBP_DEPENDANT_MATURE_MRNA	36	0.648575	2.49047	0.0384615	0.241899	0.205007	10443	tags=81%, list=29%, signal=58%	NUP37/SLBP/ALYREF/NUP35/NUP88/EIF4E/NDC1/SEH1L/RAE1/NUP54/NUP210/NUP153/NCBP2/NUP93/NUP107/SEC13/NUP205/NUP155/NUP133/NUP160/NUP43/NUP85/AAAS/NUP98/NUP62/NCBP1/POM121C/NUP58/POM121
REACTOME_JOSEPHIN_DOMAIN_DUBS	REACTOME_JOSEPHIN_DOMAIN_DUBS	12	0.568596	1.56208	0.0390625	0.241899	0.205007	5897	tags=50%, list=16%, signal=42%	RPS27A/UBA52/UBB/RAD23B/RAD23A/UBC
PID_MYC_PATHWAY	PID_MYC_PATHWAY	25	0.605616	2.06659	0.0392157	0.241899	0.205007	7786	tags=64%, list=21%, signal=50%	MYC/TAF9/ACTL6A/RUVBL1/PPP2CA/RUVBL2/SUPT3H/HBP1/TAF12/PML/SKP2/PPP2R5A/KAT5/PAK2/TAF10/PIN1
REACTOME_DOWNSTREAM_SIGNALING_OF_ACTIVATED_FGFR3	REACTOME_DOWNSTREAM_SIGNALING_OF_ACTIVATED_FGFR3	25	0.485417	1.65643	0.0392157	0.241899	0.205007	98	tags=12%, list=0%, signal=12%	FGF4/FGF5/FGF8
REACTOME_SIGNALING_BY_EGFR_IN_CANCER	REACTOME_SIGNALING_BY_EGFR_IN_CANCER	25	0.508367	1.73474	0.0392157	0.241899	0.205007	6674	tags=52%, list=18%, signal=43%	EREG/RPS27A/AREG/TGFA/UBA52/KRAS/HSP90AA1/UBB/NRAS/UBC/EGFR/HBEGF/SHC1
WP_GLYCOSYLATION_AND_RELATED_CONGENITAL_DEFECTS	WP_GLYCOSYLATION_AND_RELATED_CONGENITAL_DEFECTS	25	0.489298	1.66967	0.0392157	0.241899	0.205007	9271	tags=56%, list=25%, signal=42%	DPM1/MPDU1/MAGT1/ALG3/TUSC3/ALG14/MPI/DPM2/ALG8/ALG1/DOLK/B4GALT1/ALG2/MGAT2
WP_MAMMALIAN_DISORDER_OF_SEXUAL_DEVELOPMENT	WP_MAMMALIAN_DISORDER_OF_SEXUAL_DEVELOPMENT	25	0.495928	1.69229	0.0392157	0.241899	0.205007	1633	tags=20%, list=4%, signal=19%	FOXL2/FST/AMHR2/DMRT1/EMX2
KEGG_BASAL_TRANSCRIPTION_FACTORS	KEGG_BASAL_TRANSCRIPTION_FACTORS	35	0.435722	1.63736	0.04	0.241899	0.205007	8302	tags=60%, list=23%, signal=46%	TAF9/TAF7/TAF4B/GTF2A2/GTF2H3/GTF2B/GTF2F2/GTF2H2/TAF5/TAF12/TBPL1/TAF11/GTF2F1/GTF2E2/GTF2E1/TAF6/TAF9B/TAF13/TAF10/TBP/GTF2H1
KEGG_BASE_EXCISION_REPAIR	KEGG_BASE_EXCISION_REPAIR	35	0.625137	2.34914	0.04	0.241899	0.205007	10396	tags=89%, list=28%, signal=63%	NEIL3/HMGB1P40/POLE3/UNG/PCNA/APEX1/POLE4/FEN1/POLB/HMGB1/POLE2/POLD2/MPG/TDG/PARP1/NEIL2/APEX2/PARP2/POLL/LIG3/PARP3/OGG1/POLD1/POLD4/SMUG1/XRCC1/LIG1/PARP4/MBD4/POLE/POLD3
PID_PI3KCI_AKT_PATHWAY	PID_PI3KCI_AKT_PATHWAY	35	0.473639	1.77984	0.04	0.241899	0.205007	9702	tags=57%, list=27%, signal=42%	YWHAE/YWHAQ/HSP90AA1/YWHAZ/SFN/YWHAG/CDKN1A/YWHAB/PRKDC/MAPKAP1/MLST8/CASP9/CHUK/CDKN1B/BCL2L1/GSK3A/PRKACA/SLC2A4/YWHAH/KPNA1
REACTOME_LYSOSOME_VESICLE_BIOGENESIS	REACTOME_LYSOSOME_VESICLE_BIOGENESIS	35	0.513166	1.92838	0.04	0.241899	0.205007	9240	tags=57%, list=25%, signal=43%	CLVS2/SH3GL2/HSPA8/AP1S1/VAMP8/AP1M2/CLTA/M6PR/BLOC1S1/CLTB/AP1S2/AP1S3/VAMP7/ARF1/CHMP2A/AP4M1/APP/DNASE2/AP4S1/CLTC
REACTOME_N_GLYCAN_TRIMMING_IN_THE_ER_AND_CALNEXIN_CALRETICULIN_CYCLE	REACTOME_N_GLYCAN_TRIMMING_IN_THE_ER_AND_CALNEXIN_CALRETICULIN_CYCLE	35	0.477558	1.79457	0.04	0.241899	0.205007	6658	tags=43%, list=18%, signal=35%	RPS27A/CANX/UBA52/RNF5/UBB/RAD23B/PSMC1/RNF139/EDEM2/GANAB/UBXN1/UBC/CALR/DERL1/PRKCSH
REACTOME_SUMOYLATION_OF_SUMOYLATION_PROTEINS	REACTOME_SUMOYLATION_OF_SUMOYLATION_PROTEINS	35	0.653325	2.45506	0.04	0.241899	0.205007	10443	tags=77%, list=29%, signal=55%	NUP37/NUP35/SUMO2/NUP88/SUMO1/NDC1/SEH1L/RAE1/NUP54/NUP210/NUP153/NUP93/NUP107/UBE2I/SEC13/NUP205/NUP155/NUP133/NUP160/NUP43/NUP85/AAAS/NUP98/NUP62/POM121C/NUP58/POM121
SIG_REGULATION_OF_THE_ACTIN_CYTOSKELETON_BY_RHO_GTPASES	SIG_REGULATION_OF_THE_ACTIN_CYTOSKELETON_BY_RHO_GTPASES	35	0.491277	1.84612	0.04	0.241899	0.205007	7383	tags=49%, list=20%, signal=39%	FLNC/PFN2/RPS4X/ACTG1/GDI2/FSCN1/PAK5/CFL2/PFN1/WASF1/CDC42/ACTR2/ACTR3/CFL1/VASP/PAK2/PAK3
REACTOME_FGFR2C_LIGAND_BINDING_AND_ACTIVATION	REACTOME_FGFR2C_LIGAND_BINDING_AND_ACTIVATION	13	0.624177	1.73002	0.0413223	0.241899	0.205007	98	tags=23%, list=0%, signal=23%	FGF4/FGF5/FGF8
REACTOME_SIGNALING_BY_FGFR2_IIIA_TM	REACTOME_SIGNALING_BY_FGFR2_IIIA_TM	19	0.538554	1.69965	0.0416667	0.241899	0.205007	7042	tags=63%, list=19%, signal=51%	POLR2K/POLR2C/GTF2F2/POLR2D/POLR2G/POLR2H/POLR2I/POLR2L/NCBP2/GTF2F1/POLR2J/POLR2E
WP_TP53_NETWORK	WP_TP53_NETWORK	19	0.539842	1.70372	0.0416667	0.241899	0.205007	5871	tags=47%, list=16%, signal=40%	PMAIP1/MYC/OTX2/GADD45A/TNFSF10/SUMO1/TP53/CDKN1A/BID
BIOCARTA_CPSF_PATHWAY	BIOCARTA_CPSF_PATHWAY	10	0.635278	1.71637	0.0421687	0.241899	0.205007	7817	tags=70%, list=21%, signal=55%	CPSF3/CPSF4/CPSF2/CSTF2/CSTF1/BCL2L2-PABPN1/CSTF3
KEGG_LIMONENE_AND_PINENE_DEGRADATION	KEGG_LIMONENE_AND_PINENE_DEGRADATION	10	0.628256	1.6974	0.0421687	0.241899	0.205007	6486	tags=60%, list=18%, signal=49%	ALDH7A1/ECHS1/HADHA/ALDH1B1/EHHADH/ALDH9A1
REACTOME_IRAK2_MEDIATED_ACTIVATION_OF_TAK1_COMPLEX	REACTOME_IRAK2_MEDIATED_ACTIVATION_OF_TAK1_COMPLEX	10	0.637243	1.72168	0.0421687	0.241899	0.205007	5897	tags=50%, list=16%, signal=42%	RPS27A/UBA52/UBB/IRAK2/UBC
REACTOME_NEF_MEDIATED_DOWNREGULATION_OF_MHC_CLASS_I_COMPLEX_CELL_SURFACE_EXPRESSION	REACTOME_NEF_MEDIATED_DOWNREGULATION_OF_MHC_CLASS_I_COMPLEX_CELL_SURFACE_EXPRESSION	10	0.634973	1.71555	0.0421687	0.241899	0.205007	7800	tags=60%, list=21%, signal=47%	AP1S1/AP1M2/B2M/AP1S2/AP1S3/HLA-A
WP_NONHOMOLOGOUS_END_JOINING	WP_NONHOMOLOGOUS_END_JOINING	10	0.627075	1.69421	0.0421687	0.241899	0.205007	7917	tags=60%, list=22%, signal=47%	XRCC4/XRCC5/XRCC6/NHEJ1/PRKDC/POLL
REACTOME_ATF4_ACTIVATES_GENES_IN_RESPONSE_TO_ENDOPLASMIC_RETICULUM_STRESS	REACTOME_ATF4_ACTIVATES_GENES_IN_RESPONSE_TO_ENDOPLASMIC_RETICULUM_STRESS	27	0.659822	2.30155	0.0425532	0.241899	0.205007	8968	tags=74%, list=24%, signal=56%	IGFBP1/ASNS/EXOSC5/EXOSC2/EXOSC4/DDIT3/EXOSC7/EXOSC9/EXOSC1/NFYA/KHSRP/EXOSC8/ATF4/EXOSC3/CEBPG/PARN/ATF6/CCL2/DIS3/CXCL8
REACTOME_FGFR2_ALTERNATIVE_SPLICING	REACTOME_FGFR2_ALTERNATIVE_SPLICING	27	0.571245	1.99259	0.0425532	0.241899	0.205007	8353	tags=70%, list=23%, signal=54%	HNRNPA1/POLR2K/POLR2C/HNRNPF/GTF2F2/POLR2D/POLR2G/POLR2H/ESRP1/POLR2I/POLR2L/NCBP2/GTF2F1/PTBP1/POLR2J/POLR2E/HNRNPM/POLR2A/TIAL1
REACTOME_GLYCOGEN_METABOLISM	REACTOME_GLYCOGEN_METABOLISM	27	0.535167	1.86674	0.0425532	0.241899	0.205007	6760	tags=48%, list=18%, signal=39%	PYGL/RPS27A/GBE1/GYS2/UBA52/GYG1/PGM2/UBB/PGM1/UGP2/PYGB/UBC/PHKA1
WP_FOLLICLE_STIMULATING_HORMONE_FSH_SIGNALING_PATHWAY	WP_FOLLICLE_STIMULATING_HORMONE_FSH_SIGNALING_PATHWAY	27	0.502502	1.7528	0.0425532	0.241899	0.205007	2710	tags=19%, list=7%, signal=17%	CGA/RPS6/AREG/EIF4EBP1/CYP19A1
BIOCARTA_ATM_PATHWAY	BIOCARTA_ATM_PATHWAY	20	0.489302	1.54269	0.0434783	0.241899	0.205007	5686	tags=45%, list=16%, signal=38%	RAD51/GADD45A/CHEK1/TP53/RAD50/NBN/CDKN1A/RBBP8/BRCA1
PID_INTEGRIN2_PATHWAY	PID_INTEGRIN2_PATHWAY	28	0.463499	1.68172	0.0434783	0.241899	0.205007	1471	tags=21%, list=4%, signal=21%	KNG1/FGA/TGFBI/FGB/PLAU/FGG
REACTOME_ACTIVATION_OF_ATR_IN_RESPONSE_TO_REPLICATION_STRESS	REACTOME_ACTIVATION_OF_ATR_IN_RESPONSE_TO_REPLICATION_STRESS	37	0.747278	2.93634	0.0434783	0.241899	0.205007	5826	tags=78%, list=16%, signal=66%	CDC25C/MCM10/MCM7/CDC25A/MCM2/ORC1/MCM4/RFC4/CDC6/ORC6/RFC3/MCM6/CDC45/RPA3/RFC5/RFC2/CHEK1/DBF4/CLSPN/CDK2/MCM3/ORC5/RPA1/MCM5/RPA2/CDC7/ORC3/RAD17/ORC4
REACTOME_DETOXIFICATION_OF_REACTIVE_OXYGEN_SPECIES	REACTOME_DETOXIFICATION_OF_REACTIVE_OXYGEN_SPECIES	37	0.642454	2.52445	0.0434783	0.241899	0.205007	5807	tags=57%, list=16%, signal=48%	GPX6/TXNRD1/PRDX3/GPX5/PRDX2/NUDT2/CYCS/SOD1/PRDX6/GSR/TXN/ATOX1/ERO1A/GPX1/TXN2/GPX7/GPX8/PRDX1/GPX2/GSTP1/GPX3
REACTOME_GENE_AND_PROTEIN_EXPRESSION_BY_JAK_STAT_SIGNALING_AFTER_INTERLEUKIN_12_STIMULATION	REACTOME_GENE_AND_PROTEIN_EXPRESSION_BY_JAK_STAT_SIGNALING_AFTER_INTERLEUKIN_12_STIMULATION	37	0.539598	2.12029	0.0434783	0.241899	0.205007	8638	tags=73%, list=24%, signal=56%	RPLP0/GSTO1/LMNB1/HSPA9/SOD1/TCP1/PPIA/MIF/PSME2/MSN/HNRNPF/ANXA2/AIP/CDC42/CAPZA1/TALDO1/RAP1B/CFL1/SNRPA1/MTAP/CNN2/PAK2/ARF1/BOLA2B/RALA/LCP1/HNRNPA2B1
REACTOME_HDR_THROUGH_SINGLE_STRAND_ANNEALING_SSA_	REACTOME_HDR_THROUGH_SINGLE_STRAND_ANNEALING_SSA_	37	0.585071	2.29897	0.0434783	0.241899	0.205007	6946	tags=62%, list=19%, signal=50%	RAD51/EXO1/RFC4/RFC3/RPA3/RFC5/RFC2/RHNO1/RAD50/RPA1/NBN/RPA2/BLM/ERCC1/RBBP8/DNA2/BRCA1/RAD17/TOPBP1/RMI1/RAD1/KAT5/BRIP1
REACTOME_INTERACTIONS_OF_VPR_WITH_HOST_CELLULAR_PROTEINS	REACTOME_INTERACTIONS_OF_VPR_WITH_HOST_CELLULAR_PROTEINS	37	0.682729	2.6827	0.0434783	0.241899	0.205007	10443	tags=84%, list=29%, signal=60%	HMGA1/SLC25A5/NUP37/SLC25A6/NUP35/NUP88/BANF1/NDC1/SEH1L/SLC25A4/RAE1/NUP54/NUP210/NUP153/NUP93/NUP107/SEC13/NUP205/NUP155/PSIP1/NUP133/NUP160/NUP43/NUP85/AAAS/NUP98/KPNA1/NUP62/POM121C/NUP58/POM121
REACTOME_REGULATION_OF_TP53_EXPRESSION_AND_DEGRADATION	REACTOME_REGULATION_OF_TP53_EXPRESSION_AND_DEGRADATION	37	0.455967	1.79167	0.0434783	0.241899	0.205007	7487	tags=49%, list=20%, signal=39%	CCNA2/CCNG1/CDK1/RPS27A/PPP2CA/UBA52/CCNA1/CDK2/UBB/TP53/UBC/PPP2CB/DAXX/MAPKAP1/PPP2R5C/MLST8/CHEK2/PPP2R1A
REACTOME_RESOLUTION_OF_ABASIC_SITES_AP_SITES_	REACTOME_RESOLUTION_OF_ABASIC_SITES_AP_SITES_	37	0.639901	2.51442	0.0434783	0.241899	0.205007	5805	tags=57%, list=16%, signal=48%	RFC4/RFC3/POLE3/UNG/PCNA/RPA3/RFC5/APEX1/RFC2/POLE4/FEN1/POLB/POLE2/POLD2/MPG/RPA1/TDG/PARP1/RPA2/NEIL2/RFC1
REACTOME_SIGNALING_BY_FGFR1_IN_DISEASE	REACTOME_SIGNALING_BY_FGFR1_IN_DISEASE	37	0.443123	1.7412	0.0434783	0.241899	0.205007	98	tags=8%, list=0%, signal=8%	FGF4/FGF5/FGF8
REACTOME_TRANSCRIPTIONAL_REGULATION_BY_THE_AP_2_TFAP2_FAMILY_OF_TRANSCRIPTION_FACTORS	REACTOME_TRANSCRIPTIONAL_REGULATION_BY_THE_AP_2_TFAP2_FAMILY_OF_TRANSCRIPTION_FACTORS	37	0.649385	2.55168	0.0434783	0.241899	0.205007	6633	tags=57%, list=18%, signal=47%	CGA/CGB5/MYC/HSPD1/YEATS4/MYBL2/CGB8/TGFA/PITX2/ATAD2/DEK/SUMO1/CITED1/NOP2/CDKN1A/TFAP2A/ESR1/UBE2I/EGFR/CITED2/TFAP2D
WP_PHOTODYNAMIC_THERAPYINDUCED_HIF1_SURVIVAL_SIGNALING	WP_PHOTODYNAMIC_THERAPYINDUCED_HIF1_SURVIVAL_SIGNALING	37	0.623829	2.45126	0.0434783	0.241899	0.205007	4436	tags=38%, list=12%, signal=33%	IGFBP1/PMAIP1/SLC16A1/BIRC5/LDHA/SLC2A1/PGK1/BNIP3/TGFA/SLC2A3/PKM/TP53/BAK1/HIF1A
WP_ZINC_HOMEOSTASIS	WP_ZINC_HOMEOSTASIS	37	0.583194	2.29159	0.0434783	0.241899	0.205007	5292	tags=43%, list=14%, signal=37%	SLC30A10/MT1A/SLC39A5/MT1B/MT1E/MT1L/MT1H/MT2A/SLC30A2/MT1X/MT1G/MT3/SLC39A2/MT1F/SLC30A5/SLC39A1
REACTOME_ENDOSOMAL_VACUOLAR_PATHWAY	REACTOME_ENDOSOMAL_VACUOLAR_PATHWAY	11	0.618084	1.66787	0.0437956	0.241899	0.205007	8464	tags=64%, list=23%, signal=49%	CTSV/HLA-G/CTSL/B2M/HLA-C/HLA-A/HLA-B
REACTOME_TICAM1_TRAF6_DEPENDENT_INDUCTION_OF_TAK1_COMPLEX	REACTOME_TICAM1_TRAF6_DEPENDENT_INDUCTION_OF_TAK1_COMPLEX	11	0.618609	1.66929	0.0437956	0.241899	0.205007	8751	tags=64%, list=24%, signal=48%	RPS27A/UBA52/UBB/TLR3/UBC/TICAM1/TAB2
REACTOME_RNA_POLYMERASE_II_TRANSCRIBES_SNRNA_GENES	REACTOME_RNA_POLYMERASE_II_TRANSCRIBES_SNRNA_GENES	79	-0.572615	-1.27959	0.0440882	0.241899	0.205007	1078	tags=6%, list=3%, signal=6%	RNU1-1/RNU4ATAC/RNU11/RNU4-1/RNU5A-1
BIOCARTA_RACCYCD_PATHWAY	BIOCARTA_RACCYCD_PATHWAY	26	0.558454	1.86857	0.0444444	0.241899	0.205007	10600	tags=65%, list=29%, signal=46%	CDK4/CDK2/CCNE1/TFDP1/CDKN1A/RHOA/E2F1/CHUK/CDKN1B/RB1/CCND1/RAC1/RELA/NFKB1/CDK6/PAK1/HRAS
KEGG_GALACTOSE_METABOLISM	KEGG_GALACTOSE_METABOLISM	26	0.502143	1.68015	0.0444444	0.241899	0.205007	5285	tags=38%, list=14%, signal=33%	G6PC/LCT/PGM2/PFKP/HK2/PFKM/GLA/AKR1B1/PGM1/UGP2
KEGG_SELENOAMINO_ACID_METABOLISM	KEGG_SELENOAMINO_ACID_METABOLISM	26	0.518358	1.73441	0.0444444	0.241899	0.205007	7957	tags=54%, list=22%, signal=42%	MAT1A/AHCY/MAT2B/CTH/MARS2/LCMT1/AHCYL2/SEPHS1/METTL6/CBS/MARS1/AHCYL1/METTL2B/BUD23
PID_INSULIN_GLUCOSE_PATHWAY	PID_INSULIN_GLUCOSE_PATHWAY	26	0.522757	1.74913	0.0444444	0.241899	0.205007	3990	tags=27%, list=11%, signal=24%	PPP1R3A/YWHAE/YWHAQ/PPP1CC/YWHAZ/SFN/YWHAG
REACTOME_CALNEXIN_CALRETICULIN_CYCLE	REACTOME_CALNEXIN_CALRETICULIN_CYCLE	26	0.49809	1.66659	0.0444444	0.241899	0.205007	6658	tags=42%, list=18%, signal=35%	RPS27A/CANX/UBA52/RNF5/UBB/RNF139/EDEM2/GANAB/UBC/CALR/PRKCSH
REACTOME_DOWNREGULATION_OF_TGF_BETA_RECEPTOR_SIGNALING	REACTOME_DOWNREGULATION_OF_TGF_BETA_RECEPTOR_SIGNALING	26	0.59836	2.00209	0.0444444	0.241899	0.205007	5897	tags=38%, list=16%, signal=32%	RPS27A/BAMBI/STRAP/UBA52/PPP1CC/UBB/PPP1CA/UCHL5/PPP1CB/UBC
REACTOME_FORMATION_OF_TUBULIN_FOLDING_INTERMEDIATES_BY_CCT_TRIC	REACTOME_FORMATION_OF_TUBULIN_FOLDING_INTERMEDIATES_BY_CCT_TRIC	26	0.556951	1.86354	0.0444444	0.241899	0.205007	3302	tags=50%, list=9%, signal=46%	TUBA3C/CCT4/TUBA1C/CCT2/TUBA1B/CCT5/CCT8/CCT7/CCT3/CCT6A/TUBA4A/TCP1/TUBA3E
REACTOME_METAL_ION_SLC_TRANSPORTERS	REACTOME_METAL_ION_SLC_TRANSPORTERS	26	0.469141	1.56973	0.0444444	0.241899	0.205007	9051	tags=62%, list=25%, signal=46%	SLC30A10/SLC39A5/SLC30A2/SLC39A2/SLC30A5/SLC39A1/SLC39A10/SLC30A6/SLC40A1/SLC39A6/SLC31A1/SLC39A8/CP/SLC41A1/SLC30A3/SLC30A1
REACTOME_PD_1_SIGNALING	REACTOME_PD_1_SIGNALING	26	0.570035	1.90732	0.0444444	0.241899	0.205007	9184	tags=50%, list=25%, signal=37%	CD274/HLA-DQB2/HLA-DRB5/HLA-DRA/TRAV19/PTPN11/HLA-DQA2/HLA-DPA1/CD3D/PDCD1LG2/HLA-DRB1/TRAV29DV5/HLA-DQA1
REACTOME_POLYMERASE_SWITCHING_ON_THE_C_STRAND_OF_THE_TELOMERE	REACTOME_POLYMERASE_SWITCHING_ON_THE_C_STRAND_OF_THE_TELOMERE	26	0.666629	2.23052	0.0444444	0.241899	0.205007	6333	tags=62%, list=17%, signal=51%	PRIM1/DSCC1/RFC4/RFC3/PCNA/RFC5/STN1/RFC2/PRIM2/POLD2/POLA2/POT1/CHTF8/RFC1/TINF2/TERF1
REACTOME_RESOLUTION_OF_D_LOOP_STRUCTURES_THROUGH_SYNTHESIS_DEPENDENT_STRAND_ANNEALING_SDSA_	REACTOME_RESOLUTION_OF_D_LOOP_STRUCTURES_THROUGH_SYNTHESIS_DEPENDENT_STRAND_ANNEALING_SDSA_	26	0.506005	1.69308	0.0444444	0.241899	0.205007	7642	tags=54%, list=21%, signal=43%	RAD51AP1/RAD51/EXO1/RAD50/NBN/BLM/RBBP8/XRCC2/DNA2/BRCA1/RMI1/KAT5/BRIP1/RMI2
WP_PHOTODYNAMIC_THERAPYINDUCED_UNFOLDED_PROTEIN_RESPONSE	WP_PHOTODYNAMIC_THERAPYINDUCED_UNFOLDED_PROTEIN_RESPONSE	26	0.461123	1.5429	0.0444444	0.241899	0.205007	7068	tags=50%, list=19%, signal=40%	ASNS/TRIB3/UBE2E1/EIF2A/DNAJB9/PDIA6/DDIT3/HSPA5/WARS1/NARS1/ATF4/CALR/HSP90B1
BIOCARTA_ATRBRCA_PATHWAY	BIOCARTA_ATRBRCA_PATHWAY	21	0.481038	1.54936	0.0454545	0.241899	0.205007	7513	tags=62%, list=21%, signal=49%	RAD51/CHEK1/FANCE/TP53/FANCD2/RAD50/NBN/BRCA1/RAD17/FANCG/RAD1/CHEK2/FANCA
BIOCARTA_CERAMIDE_PATHWAY	BIOCARTA_CERAMIDE_PATHWAY	21	0.47208	1.5205	0.0454545	0.241899	0.205007	19336	tags=100%, list=53%, signal=47%	MAP2K1/FADD/TNFRSF1A/NSMAF/BAX/MAP2K4/AIFM1/RELA/CASP8/NFKB1/MAPK8/RAF1/MAPK1/MAPK3/BAD/BCL2/RIPK1/SMPD1/TRADD/TRAF2/MAP3K1
BIOCARTA_P53HYPOXIA_PATHWAY	BIOCARTA_P53HYPOXIA_PATHWAY	21	0.472897	1.52314	0.0454545	0.241899	0.205007	4768	tags=43%, list=13%, signal=37%	DNAJB1/HSP90AA1/GADD45A/TP53/NQO1/HSPA1A/RPA1/HIF1A/CDKN1A
KEGG_SNARE_INTERACTIONS_IN_VESICULAR_TRANSPORT	KEGG_SNARE_INTERACTIONS_IN_VESICULAR_TRANSPORT	38	0.353862	1.40129	0.0454545	0.241899	0.205007	10308	tags=55%, list=28%, signal=40%	BNIP1/VAMP8/STX8/BET1/VAMP5/USE1/STX18/VAMP3/STX5/SNAP23/VAMP7/STX10/VTI1B/SNAP29/SNAP47/GOSR1/STX12/SEC22B/BET1L/YKT6/STX6
PID_ATR_PATHWAY	PID_ATR_PATHWAY	38	0.691995	2.74029	0.0454545	0.241899	0.205007	6035	tags=71%, list=16%, signal=59%	CDC25C/CCNA2/PLK1/RAD51/MCM7/CDC25A/MCM2/RFC4/CDC6/RFC3/RFC5/PPP2CA/RFC2/TIPIN/YWHAZ/CHEK1/CLSPN/TIMELESS/CDK2/FBXW11/FANCD2/RPA1/NBN/RPA2/RAD17/YWHAB/TOPBP1
PID_AURORA_B_PATHWAY	PID_AURORA_B_PATHWAY	38	0.654868	2.59327	0.0454545	0.241899	0.205007	5636	tags=68%, list=15%, signal=58%	NCAPG/BIRC5/KIF20A/AURKA/RACGAP1/SGO1/AURKB/CENPA/NCAPH/BUB1/KIF23/KIF2C/STMN1/NDC80/CDCA8/NCAPD2/SMC4/PPP1CC/NCL/PSMA3/SMC2/INCENP/RHOA/PEBP1/VIM/PPP2R5D
PID_ECADHERIN_NASCENT_AJ_PATHWAY	PID_ECADHERIN_NASCENT_AJ_PATHWAY	39	0.4304	1.77205	0.0454545	0.241899	0.205007	10197	tags=54%, list=28%, signal=39%	NME1/CTNNA1/CTNNB1/CDC42/CSNK2B/RHOA/CSNK2A2/ARF6/RAP1B/CYFIP2/CSNK2A1/ABI1/CCND1/NCKAP1/RAC1/IQGAP1/CRK/RAP1A/ITGAE/CDH1/AP1M1
REACTOME_APOPTOTIC_CLEAVAGE_OF_CELLULAR_PROTEINS	REACTOME_APOPTOTIC_CLEAVAGE_OF_CELLULAR_PROTEINS	38	0.469071	1.85752	0.0454545	0.241899	0.205007	6746	tags=37%, list=18%, signal=30%	LMNB1/DSG2/CLSPN/DSG3/PKP1/STK26/DSP/CTNNB1/CASP6/FNTA/GAS2/VIM/OCLN/STK24
REACTOME_ASSOCIATION_OF_TRIC_CCT_WITH_TARGET_PROTEINS_DURING_BIOSYNTHESIS	REACTOME_ASSOCIATION_OF_TRIC_CCT_WITH_TARGET_PROTEINS_DURING_BIOSYNTHESIS	39	0.469327	1.93232	0.0454545	0.241899	0.205007	7646	tags=51%, list=21%, signal=41%	CCT4/CCT2/CCT5/CCT8/CCT7/CCT3/CCT6A/HDAC3/TCP1/NOP56/TP53/CCNE1/FBXO4/FBXL5/CCNE2/AP3M1/XRN2/FBXW9/FBXO6/SPHK1
REACTOME_DNA_DAMAGE_RECOGNITION_IN_GG_NER	REACTOME_DNA_DAMAGE_RECOGNITION_IN_GG_NER	38	0.614562	2.43366	0.0454545	0.241899	0.205007	7729	tags=66%, list=21%, signal=52%	RPS27A/COPS3/ACTL6A/RUVBL1/UBA52/COPS2/COPS6/COPS4/UBB/RAD23B/COPS8/RAD23A/RBX1/COPS5/PARP1/UBC/MCRS1/COPS7A/DDB1/ACTB/INO80C/GPS1/PARP2/CUL4B/DDB2
REACTOME_FANCONI_ANEMIA_PATHWAY	REACTOME_FANCONI_ANEMIA_PATHWAY	39	0.432993	1.78272	0.0454545	0.241899	0.205007	6890	tags=54%, list=19%, signal=44%	UBE2T/RPS27A/RPA3/UBA52/FANCI/FANCE/UBB/FAAP24/FANCD2/RPA1/CENPX/RPA2/EME1/ERCC1/CENPS/UBC/USP1/DCLRE1B/FANCG/DCLRE1A/FANCB
REACTOME_FORMATION_OF_FIBRIN_CLOT_CLOTTING_CASCADE_	REACTOME_FORMATION_OF_FIBRIN_CLOT_CLOTTING_CASCADE_	38	0.380848	1.50815	0.0454545	0.241899	0.205007	2803	tags=29%, list=8%, signal=27%	KNG1/F2/FGA/F12/FGB/C1QBP/FGG/F13A1/PROCR/TFPI/SERPINA5
REACTOME_GAP_JUNCTION_ASSEMBLY	REACTOME_GAP_JUNCTION_ASSEMBLY	38	0.379141	1.50139	0.0454545	0.241899	0.205007	4877	tags=34%, list=13%, signal=30%	GJA3/TUBA3C/GJD2/GJB3/TUBA1C/TUBA1B/GJB6/TUBA4A/TUBA3E/GJB1/GJC1/TUBB6/GJB2
REACTOME_HSF1_DEPENDENT_TRANSACTIVATION	REACTOME_HSF1_DEPENDENT_TRANSACTIVATION	38	0.508258	2.0127	0.0454545	0.241899	0.205007	7598	tags=53%, list=21%, signal=42%	HSPA6/FKBP4/PTGES3/HSP90AB1/HSPA8/DNAJB1/HSPA1B/HSP90AA1/UBB/HSPA1A/HSBP1/MRPL18/HSPB1/HSF1/RLN1/SERPINH1/HSPH1/GML/MLST8/HSPB8
REACTOME_NEGATIVE_REGULATION_OF_MET_ACTIVITY	REACTOME_NEGATIVE_REGULATION_OF_MET_ACTIVITY	21	0.477432	1.53774	0.0454545	0.241899	0.205007	5897	tags=38%, list=16%, signal=32%	RPS27A/SH3GL2/MET/UBA52/UBB/STAM/SH3KBP1/UBC
REACTOME_OVARIAN_TUMOR_DOMAIN_PROTEASES	REACTOME_OVARIAN_TUMOR_DOMAIN_PROTEASES	38	0.403946	1.59962	0.0454545	0.241899	0.205007	5897	tags=34%, list=16%, signal=29%	CDK1/RPS27A/UBA52/UBB/IFIH1/TP53/RIPK2/TNIP1/OTUB2/RHOA/ESR1/OTUB1/UBC
REACTOME_SUMOYLATION_OF_UBIQUITINYLATION_PROTEINS	REACTOME_SUMOYLATION_OF_UBIQUITINYLATION_PROTEINS	39	0.592888	2.44104	0.0454545	0.241899	0.205007	10443	tags=74%, list=29%, signal=53%	NUP37/NUP35/NUP88/SUMO1/NDC1/SEH1L/RAE1/NUP54/NUP210/NUP153/PML/NUP93/NUP107/UBE2I/SEC13/NUP205/NUP155/NUP133/NUP160/NUP43/TRIM27/NUP85/AAAS/NUP98/NUP62/POM121C/MDM2/NUP58/POM121
REACTOME_TRANSLESION_SYNTHESIS_BY_Y_FAMILY_DNA_POLYMERASES_BYPASSES_LESIONS_ON_DNA_TEMPLATE	REACTOME_TRANSLESION_SYNTHESIS_BY_Y_FAMILY_DNA_POLYMERASES_BYPASSES_LESIONS_ON_DNA_TEMPLATE	39	0.63003	2.59397	0.0454545	0.241899	0.205007	6474	tags=59%, list=18%, signal=49%	PCLAF/RPS27A/RFC4/RFC3/POLE3/PCNA/RPA3/RFC5/ISG15/UBA52/RFC2/POLE4/MAD2L2/UBE2L6/POLE2/POLD2/UBB/RPA1/RPA2/RFC1/UBC/RCHY1/USP10
ST_PHOSPHOINOSITIDE_3_KINASE_PATHWAY	ST_PHOSPHOINOSITIDE_3_KINASE_PATHWAY	38	0.437119	1.73099	0.0454545	0.241899	0.205007	6918	tags=32%, list=19%, signal=26%	IGFBP1/S100A9/YWHAE/YWHAQ/YWHAZ/SFN/YWHAG/IARS1/EXOSC1/YWHAB/SHC1/CD55
WP_MBDNF_AND_PROBDNF_REGULATION_OF_GABA_NEUROTRANSMISSION	WP_MBDNF_AND_PROBDNF_REGULATION_OF_GABA_NEUROTRANSMISSION	38	0.433422	1.71635	0.0454545	0.241899	0.205007	1573	tags=18%, list=4%, signal=18%	GABRA5/GABRB1/GABRB2/GABRG3/GABRQ/GABRA1/GABRA2
WP_UREA_CYCLE_AND_METABOLISM_OF_AMINO_GROUPS	WP_UREA_CYCLE_AND_METABOLISM_OF_AMINO_GROUPS	21	0.487294	1.56951	0.0454545	0.241899	0.205007	9117	tags=81%, list=25%, signal=61%	CPS1/ODC1/GAMT/NAGS/ASS1/SMS/GLUD1/ARG2/SRM/ALDH18A1/PYCR3/OAT/ASL/GATM/PYCR1/ACY1/CKB
BIOCARTA_HIF_PATHWAY	BIOCARTA_HIF_PATHWAY	15	0.527084	1.52869	0.046729	0.243262	0.206162	4465	tags=33%, list=12%, signal=29%	ASPH/LDHA/HSP90AA1/HIF1A/COPS5
REACTOME_DEPOLYMERISATION_OF_THE_NUCLEAR_LAMINA	REACTOME_DEPOLYMERISATION_OF_THE_NUCLEAR_LAMINA	15	0.580414	1.68336	0.046729	0.243262	0.206162	1754	tags=27%, list=5%, signal=25%	CCNB1/CDK1/LMNB1/TMPO
REACTOME_GRB2_SOS_PROVIDES_LINKAGE_TO_MAPK_SIGNALING_FOR_INTEGRINS_	REACTOME_GRB2_SOS_PROVIDES_LINKAGE_TO_MAPK_SIGNALING_FOR_INTEGRINS_	15	0.565439	1.63993	0.046729	0.243262	0.206162	1658	tags=27%, list=5%, signal=25%	FGA/FGB/FGG/ITGB3
REACTOME_INLB_MEDIATED_ENTRY_OF_LISTERIA_MONOCYTOGENES_INTO_HOST_CELL	REACTOME_INLB_MEDIATED_ENTRY_OF_LISTERIA_MONOCYTOGENES_INTO_HOST_CELL	15	0.600309	1.74106	0.046729	0.243262	0.206162	5897	tags=53%, list=16%, signal=45%	RPS27A/SH3GL2/MET/UBA52/UBB/STAM/SH3KBP1/UBC
REACTOME_MRNA_DECAY_BY_5_TO_3_EXORIBONUCLEASE	REACTOME_MRNA_DECAY_BY_5_TO_3_EXORIBONUCLEASE	15	0.586935	1.70227	0.046729	0.243262	0.206162	7913	tags=67%, list=22%, signal=52%	LSM2/LSM3/LSM6/LSM4/LSM5/LSM1/PATL1/EDC3/DCP1A/LSM7
REACTOME_P130CAS_LINKAGE_TO_MAPK_SIGNALING_FOR_INTEGRINS	REACTOME_P130CAS_LINKAGE_TO_MAPK_SIGNALING_FOR_INTEGRINS	15	0.548097	1.58963	0.046729	0.243262	0.206162	1658	tags=27%, list=5%, signal=25%	FGA/FGB/FGG/ITGB3
REACTOME_PHOSPHOLIPASE_C_MEDIATED_CASCADE_FGFR4	REACTOME_PHOSPHOLIPASE_C_MEDIATED_CASCADE_FGFR4	15	0.563164	1.63333	0.046729	0.243262	0.206162	363	tags=20%, list=1%, signal=20%	FGF4/FGF8/FGF19
REACTOME_PHOSPHORYLATION_SITE_MUTANTS_OF_CTNNB1_ARE_NOT_TARGETED_TO_THE_PROTEASOME_BY_THE_DESTRUCTION_COMPLEX	REACTOME_PHOSPHORYLATION_SITE_MUTANTS_OF_CTNNB1_ARE_NOT_TARGETED_TO_THE_PROTEASOME_BY_THE_DESTRUCTION_COMPLEX	15	0.578203	1.67695	0.046729	0.243262	0.206162	7487	tags=60%, list=20%, signal=48%	PPP2CA/CSNK1A1/CTNNB1/PPP2R5D/PPP2R5A/PPP2CB/PPP2R5E/PPP2R5C/PPP2R1A
WP_CYSTEINE_AND_METHIONINE_CATABOLISM	WP_CYSTEINE_AND_METHIONINE_CATABOLISM	15	0.599749	1.73944	0.046729	0.243262	0.206162	3953	tags=53%, list=11%, signal=48%	MAT1A/BHMT/AHCY/GOT1/SQOR/GCLC/CTH/ETHE1
BIOCARTA_SPPA_PATHWAY	BIOCARTA_SPPA_PATHWAY	16	0.557642	1.6388	0.049505	0.251168	0.212863	5110	tags=19%, list=14%, signal=16%	F2/MAP2K1/ITGB1
REACTOME_FGFRL1_MODULATION_OF_FGFR1_SIGNALING	REACTOME_FGFRL1_MODULATION_OF_FGFR1_SIGNALING	13	0.581667	1.6122	0.0495868	0.251168	0.212863	98	tags=23%, list=0%, signal=23%	FGF4/FGF5/FGF8
REACTOME_MITOTIC_TELOPHASE_CYTOKINESIS	REACTOME_MITOTIC_TELOPHASE_CYTOKINESIS	13	0.598307	1.65832	0.0495868	0.251168	0.212863	4860	tags=38%, list=13%, signal=33%	KIF20A/PLK1/KIF23/RAD21/SMC3
REACTOME_PURINE_SALVAGE	REACTOME_PURINE_SALVAGE	13	0.579613	1.60651	0.0495868	0.251168	0.212863	3861	tags=62%, list=11%, signal=55%	ADK/PNP/HPRT1/GMPR/ADA/DCK/APRT/GMPR2
REACTOME_SYNTHESIS_SECRETION_AND_INACTIVATION_OF_GLUCOSE_DEPENDENT_INSULINOTROPIC_POLYPEPTIDE_GIP_	REACTOME_SYNTHESIS_SECRETION_AND_INACTIVATION_OF_GLUCOSE_DEPENDENT_INSULINOTROPIC_POLYPEPTIDE_GIP_	13	0.581786	1.61253	0.0495868	0.251168	0.212863	4709	tags=54%, list=13%, signal=47%	GIP/ISL1/GPR119/DPP4/PCSK1/SPCS1/SEC11A
WP_PURINE_METABOLISM	WP_PURINE_METABOLISM	13	0.593799	1.64583	0.0495868	0.251168	0.212863	6003	tags=69%, list=16%, signal=58%	PNP/HPRT1/ADSL/ATIC/ADA/PRPS1/APRT/XDH/DGUOK
KEGG_PYRUVATE_METABOLISM	KEGG_PYRUVATE_METABOLISM	40	0.422243	1.76102	0.05	0.251168	0.212863	6951	tags=50%, list=19%, signal=41%	PCK1/LDHB/LDHA/ME1/GLO1/MDH1/PKM/MDH2/ACAT2/PDHB/ALDH7A1/GRHPR/ALDH1B1/DLD/AKR1B1/DLAT/ALDH9A1/ACAT1/PCK2/PC
PID_EPHB_FWD_PATHWAY	PID_EPHB_FWD_PATHWAY	40	0.366487	1.52848	0.05	0.251168	0.212863	9421	tags=55%, list=26%, signal=41%	KRAS/TF/MAP2K1/EFNB2/CDC42/PXN/NRAS/EFNA5/EPHB1/NCK1/RAP1B/EPHB2/EPHB3/EFNB3/SHC1/MAP4K4/RRAS/RASA1/RAC1/WASL/CRK/RAP1A
PID_FOXM1_PATHWAY	PID_FOXM1_PATHWAY	40	0.620918	2.58961	0.05	0.251168	0.212863	4149	tags=48%, list=11%, signal=42%	CCNB1/CCNA2/BIRC5/CCNB2/NEK2/CKS1B/MYC/FOXM1/CDK1/PLK1/AURKB/CENPA/TGFA/CDK4/CDK2/CCNE1/CENPF/ETV5/MAP2K1
REACTOME_MAP2K_AND_MAPK_ACTIVATION	REACTOME_MAP2K_AND_MAPK_ACTIVATION	40	0.42592	1.77635	0.05	0.251168	0.212863	6286	tags=35%, list=17%, signal=29%	FGA/FGB/FGG/ITGB3/KRAS/ACTG1/MAP2K1/NRAS/PEBP1/LAMTOR2/LAMTOR3/RAP1B/YWHAB/ACTB
REACTOME_MTOR_SIGNALLING	REACTOME_MTOR_SIGNALLING	40	0.401431	1.67422	0.05	0.251168	0.212863	7368	tags=38%, list=20%, signal=30%	RPS6/EIF4B/EIF4EBP1/PRKAG1/LAMTOR4/LAMTOR5/EIF4E/RHEB/LAMTOR1/LAMTOR2/LAMTOR3/YWHAB/EIF4G1/RRAGA/MLST8
REACTOME_SIGNALING_BY_FGFR3	REACTOME_SIGNALING_BY_FGFR3	40	0.435726	1.81725	0.05	0.251168	0.212863	6674	tags=35%, list=18%, signal=29%	FGF4/FGF5/FGF8/RPS27A/PPP2CA/UBA52/KRAS/UBB/NRAS/SPRY2/UBC/PPP2CB/PTPN11/SHC1
WP_ATM_SIGNALING_PATHWAY	WP_ATM_SIGNALING_PATHWAY	40	0.529446	2.20812	0.05	0.251168	0.212863	7391	tags=52%, list=20%, signal=42%	CCNB1/CDC25C/CDK1/RAD51/CDC25A/GADD45A/CRADD/CHEK1/CDK2/TP53/MAPK9/CCNE1/FANCD2/RAD50/NBN/CDKN1A/BRCA1/BID/MDC1/H2AX/CHEK2
WP_FERROPTOSIS	WP_FERROPTOSIS	40	0.527557	2.20024	0.05	0.251168	0.212863	9341	tags=80%, list=26%, signal=60%	VDAC2/VDAC3/MAP1LC3C/GCLC/PCBP2/TP53/SLC7A11/STEAP3/GCLM/TF/ACSL6/GPX4/FTH1/TFRC/PCBP1/ACSL4/NCOA4/ATG5/PRNP/MAP1LC3B/SLC3A2/SLC40A1/SAT2/GSS/ACSL3/SLC39A8/CP/LPCAT3/FTL/ACSL5/ATG7/FTMT
WP_GLYCOGEN_SYNTHESIS_AND_DEGRADATION	WP_GLYCOGEN_SYNTHESIS_AND_DEGRADATION	40	0.501886	2.09318	0.05	0.251168	0.212863	8710	tags=62%, list=24%, signal=48%	PPP2R2C/PYGL/GBE1/GYS2/PPP2CA/GYG1/CALM2/HK2/HKDC1/PGM1/PPP2R2A/UGP2/CALM3/PPP2R5D/PYGB/PPP2R5A/PPP2CB/PHKA1/PPP2R5E/PPP2R5C/PPP2R1A/GYS1/PTPA/HK1/GSK3A
REACTOME_RECEPTOR_MEDIATED_MITOPHAGY	REACTOME_RECEPTOR_MEDIATED_MITOPHAGY	11	0.613614	1.65581	0.0510949	0.25607	0.217017	6263	tags=73%, list=17%, signal=60%	PGAM5/FUNDC1/CSNK2B/CSNK2A2/ATG5/ATG12/MAP1LC3B/CSNK2A1
REACTOME_FORMATION_OF_SENESCENCE_ASSOCIATED_HETEROCHROMATIN_FOCI_SAHF_	REACTOME_FORMATION_OF_SENESCENCE_ASSOCIATED_HETEROCHROMATIN_FOCI_SAHF_	17	-0.69676	-1.38646	0.0515351	0.257675	0.218378	1723	tags=24%, list=5%, signal=22%	H1-4/H1-3/H1-5/H1-1
WP_OMEGA9_FA_SYNTHESIS	WP_OMEGA9_FA_SYNTHESIS	14	0.589026	1.66805	0.0526316	0.262547	0.222506	8224	tags=71%, list=22%, signal=55%	ELOVL2/ELOVL6/ELOVL3/ACSL4/SCD/FADS1/ELOVL5/ELOVL1/ACSL3/ACOT2
REACTOME_PI_3K_CASCADE_FGFR2	REACTOME_PI_3K_CASCADE_FGFR2	23	0.468455	1.57471	0.0535714	0.264171	0.223883	98	tags=13%, list=0%, signal=13%	FGF4/FGF5/FGF8
ST_GA12_PATHWAY	ST_GA12_PATHWAY	23	0.449825	1.51209	0.0535714	0.264171	0.223883	7344	tags=26%, list=20%, signal=21%	F2/F2RL1/F2RL2/EPHB2/RASAL1/MAP2K5
WP_NRF2ARE_REGULATION	WP_NRF2ARE_REGULATION	23	0.476892	1.60308	0.0535714	0.264171	0.223883	6342	tags=39%, list=17%, signal=32%	GCLC/PGAM5/AIMP2/NQO1/SLC7A11/GCLM/RBX1/KEAP1/EPHB2
WP_PHOTODYNAMIC_THERAPYINDUCED_NFE2L2_NRF2_SURVIVAL_SIGNALING	WP_PHOTODYNAMIC_THERAPYINDUCED_NFE2L2_NRF2_SURVIVAL_SIGNALING	23	0.456212	1.53356	0.0535714	0.264171	0.223883	7676	tags=52%, list=21%, signal=41%	ABCC2/GCLC/SRXN1/NQO1/GCLM/EPHX1/GSTP1/KEAP1/NQO2/MAPK13/ABCC4/MAPK14
WP_THE_HUMAN_IMMUNE_RESPONSE_TO_TUBERCULOSIS	WP_THE_HUMAN_IMMUNE_RESPONSE_TO_TUBERCULOSIS	23	0.472968	1.58989	0.0535714	0.264171	0.223883	5840	tags=39%, list=16%, signal=33%	IFIT1/PSMB8/IFIT3/OAS1/MX1/IFITM1/TAP1/IFI35/STAT1
BIOCARTA_EIF2_PATHWAY	BIOCARTA_EIF2_PATHWAY	10	0.605862	1.6369	0.0542169	0.264744	0.224368	9687	tags=80%, list=26%, signal=59%	EIF2S3/EIF2S1/EIF2S2/EIF5/EIF2B5/EIF2AK2/EIF2AK1/EIF2AK4
BIOCARTA_FREE_PATHWAY	BIOCARTA_FREE_PATHWAY	10	0.610914	1.65055	0.0542169	0.264744	0.224368	9967	tags=90%, list=27%, signal=66%	SOD1/GSR/GPX1/XDH/GSS/RELA/CXCL8/NFKB1/NOX1
REACTOME_CHYLOMICRON_REMODELING	REACTOME_CHYLOMICRON_REMODELING	10	0.608326	1.64355	0.0542169	0.264744	0.224368	1708	tags=30%, list=5%, signal=29%	APOA4/APOC3/APOA1
REACTOME_TETRAHYDROBIOPTERIN_BH4_SYNTHESIS_RECYCLING_SALVAGE_AND_REGULATION	REACTOME_TETRAHYDROBIOPTERIN_BH4_SYNTHESIS_RECYCLING_SALVAGE_AND_REGULATION	10	0.606435	1.63845	0.0542169	0.264744	0.224368	9543	tags=70%, list=26%, signal=52%	DHFR/HSP90AA1/SPR/GCHFR/NOS3/PTS/GCH1
REACTOME_METALLOPROTEASE_DUBS	REACTOME_METALLOPROTEASE_DUBS	36	-0.622414	-1.32998	0.0543033	0.264744	0.224368	5318	tags=31%, list=15%, signal=26%	H2AC8/H2AC11/H2AC13/H2AC20/H2AC7/H2AC17/H2AC16/H2AC4/H2AC12/H2AC14/H2AC21
BIOCARTA_EXTRINSIC_PATHWAY	BIOCARTA_EXTRINSIC_PATHWAY	13	0.571147	1.58304	0.0578512	0.274673	0.232783	2413	tags=38%, list=7%, signal=36%	F2/FGA/FGB/FGG/TFPI
REACTOME_DISSOLUTION_OF_FIBRIN_CLOT	REACTOME_DISSOLUTION_OF_FIBRIN_CLOT	13	0.559233	1.55002	0.0578512	0.274673	0.232783	7037	tags=77%, list=19%, signal=62%	HRG/PLAU/S100A10/SERPINF2/ANXA2/SERPINE2/PLAUR/SERPINB8/SERPINB6/PLAT
REACTOME_SUPPRESSION_OF_PHAGOSOMAL_MATURATION	REACTOME_SUPPRESSION_OF_PHAGOSOMAL_MATURATION	13	0.570413	1.58101	0.0578512	0.274673	0.232783	6489	tags=54%, list=18%, signal=44%	RPS27A/UBA52/UBB/KPNB1/RAB7A/UBC/ATP6V1H
WP_OSTEOPONTIN_SIGNALING	WP_OSTEOPONTIN_SIGNALING	13	0.549205	1.52223	0.0578512	0.274673	0.232783	4149	tags=31%, list=11%, signal=27%	PLAU/SPP1/ITGB3/MAP2K1
REACTOME_BIOTIN_TRANSPORT_AND_METABOLISM	REACTOME_BIOTIN_TRANSPORT_AND_METABOLISM	11	0.589621	1.59107	0.0583942	0.274673	0.232783	6951	tags=64%, list=19%, signal=52%	MCCC2/PDZD11/PCCB/SLC5A6/PCCA/BTD/PC
REACTOME_INTERLEUKIN_7_SIGNALING	REACTOME_INTERLEUKIN_7_SIGNALING	34	-0.625526	-1.3324	0.0584615	0.274673	0.232783	4944	tags=24%, list=14%, signal=20%	H3C4/H3C8/H3C13/H3C12/RAG2/H3C1/H3C7/H3C11
KEGG_AMINOACYL_TRNA_BIOSYNTHESIS	KEGG_AMINOACYL_TRNA_BIOSYNTHESIS	41	0.743684	2.93795	0.0588235	0.274673	0.232783	7885	tags=83%, list=22%, signal=65%	RARS1/YARS2/FARSB/LARS1/DARS1/VARS1/KARS1/DARS2/SARS1/TARS1/HARS1/FARSA/FARS2/GARS1/WARS2/MARS2/IARS1/YARS1/HARS2/WARS1/QARS1/MARS1/EPRS1/NARS1/RARS2/LARS2/EARS2/IARS2/PARS2/PSTK/CARS1/MTFMT/AARS1/TARS2
REACTOME_COOPERATION_OF_PDCL_PHLP1_AND_TRIC_CCT_IN_G_PROTEIN_BETA_FOLDING	REACTOME_COOPERATION_OF_PDCL_PHLP1_AND_TRIC_CCT_IN_G_PROTEIN_BETA_FOLDING	42	0.360293	1.44818	0.0588235	0.274673	0.232783	6321	tags=48%, list=17%, signal=39%	CCT4/CCT2/CCT5/CCT8/CCT7/CCT3/CCT6A/GNG11/TCP1/GNGT2/GNG4/GNG10/CSNK2B/GNG5/CSNK2A2/GNGT1/GNB2/GNAI3/CSNK2A1/GNG12
REACTOME_DUAL_INCISION_IN_GG_NER	REACTOME_DUAL_INCISION_IN_GG_NER	41	0.702108	2.7737	0.0588235	0.274673	0.232783	9311	tags=80%, list=25%, signal=60%	RPS27A/RFC4/RFC3/POLE3/PCNA/RPA3/RFC5/UBA52/RFC2/POLE4/GTF2H5/POLE2/POLD2/UBB/GTF2H3/CHD1L/RBX1/RPA1/PARP1/RPA2/GTF2H2/ERCC1/RFC1/UBC/DDB1/PARP2/CUL4B/DDB2/GTF2H1/ERCC2/POLD1/ERCC3/POLD4
REACTOME_EPHB_MEDIATED_FORWARD_SIGNALING	REACTOME_EPHB_MEDIATED_FORWARD_SIGNALING	42	0.373578	1.50158	0.0588235	0.274673	0.232783	8834	tags=55%, list=24%, signal=42%	ARPC1A/ACTG1/ARPC3/EFNB2/ARPC4/CDC42/RHOA/EPHB1/ARPC5/ARPC2/ACTR2/ACTR3/CFL1/ACTB/EPHB2/EPHB3/EFNB3/LYN/ARPC1B/RASA1/RAC1/WASL/SDC2
REACTOME_GAMMA_CARBOXYLATION_HYPUSINE_FORMATION_AND_ARYLSULFATASE_ACTIVATION	REACTOME_GAMMA_CARBOXYLATION_HYPUSINE_FORMATION_AND_ARYLSULFATASE_ACTIVATION	42	0.342827	1.37798	0.0588235	0.274673	0.232783	7641	tags=38%, list=21%, signal=30%	F2/ARSL/EIF5A/EEF2/DPH5/DPH3/ARSK/SUMF2/DPH6/ARSI/FURIN/ARSH/FN3KRP/DHPS/PROS1/DPH2
REACTOME_HOMOLOGOUS_DNA_PAIRING_AND_STRAND_EXCHANGE	REACTOME_HOMOLOGOUS_DNA_PAIRING_AND_STRAND_EXCHANGE	42	0.584785	2.35052	0.0588235	0.274673	0.232783	6946	tags=60%, list=19%, signal=48%	RAD51AP1/RAD51/EXO1/RFC4/RFC3/RPA3/RFC5/RFC2/CHEK1/RHNO1/RAD50/RPA1/NBN/RPA2/BLM/RBBP8/XRCC2/DNA2/BRCA1/RAD17/TOPBP1/RMI1/RAD1/KAT5/BRIP1
REACTOME_NS1_MEDIATED_EFFECTS_ON_HOST_PATHWAYS	REACTOME_NS1_MEDIATED_EFFECTS_ON_HOST_PATHWAYS	41	0.641147	2.53287	0.0588235	0.274673	0.232783	10443	tags=78%, list=29%, signal=56%	KPNA2/NUP37/ISG15/NUP35/NUP88/NDC1/KPNA3/CPSF4/SEH1L/RAE1/KPNB1/NUP54/NUP210/NUP153/NUP93/NUP107/KPNA4/SEC13/NUP205/NUP155/NUP133/NUP160/NUP43/NUP85/AAAS/EIF2AK2/NUP98/KPNA1/NUP62/POM121C/NUP58/POM121
REACTOME_RNA_POLYMERASE_III_TRANSCRIPTION	REACTOME_RNA_POLYMERASE_III_TRANSCRIPTION	41	0.491997	1.94365	0.0588235	0.274673	0.232783	8496	tags=68%, list=23%, signal=53%	POLR3G/GTF3A/POLR1D/POLR2K/BRF2/POLR3K/POLR1C/SSB/SNAPC1/POLR2H/POLR3C/SNAPC5/POLR2L/ZNF143/GTF3C3/GTF3C6/SNAPC2/POLR2E/GTF3C2/POLR3A/POLR3B/POLR3H/TBP/POLR3GL/POLR3D/GTF3C4/GTF3C5/POLR3F
REACTOME_SIGNALING_BY_FGFR4	REACTOME_SIGNALING_BY_FGFR4	41	0.410177	1.62042	0.0588235	0.274673	0.232783	6674	tags=34%, list=18%, signal=28%	FGF4/FGF8/FGF19/RPS27A/PPP2CA/UBA52/KRAS/UBB/NRAS/SPRY2/UBC/PPP2CB/PTPN11/SHC1
REACTOME_TRNA_AMINOACYLATION	REACTOME_TRNA_AMINOACYLATION	42	0.763033	3.06698	0.0588235	0.274673	0.232783	7885	tags=88%, list=22%, signal=69%	PPA1/RARS1/YARS2/EEF1E1/FARSB/LARS1/DARS1/VARS1/PPA2/KARS1/DARS2/AIMP2/SARS1/TARS1/HARS1/FARSA/FARS2/GARS1/AIMP1/WARS2/MARS2/IARS1/YARS1/HARS2/WARS1/QARS1/MARS1/EPRS1/NARS1/RARS2/LARS2/EARS2/IARS2/PARS2/CARS1/AARS1/TARS2
WP_DNA_REPLICATION	WP_DNA_REPLICATION	42	0.748312	3.00781	0.0588235	0.274673	0.232783	5897	tags=83%, list=16%, signal=70%	CDT1/MCM10/PRIM1/GMNN/MCM7/MCM2/ORC1/MCM4/RFC4/CDC6/ORC6/RFC3/MCM6/PCNA/CDC45/RPA3/RFC5/UBA52/RFC2/PRIM2/DBF4/POLE2/CDK2/POLD2/MCM3/ORC5/RPA1/MCM5/RPA2/CDC7/POLA2/ORC3/RFC1/ORC4/UBC
WP_EUKARYOTIC_TRANSCRIPTION_INITIATION	WP_EUKARYOTIC_TRANSCRIPTION_INITIATION	42	0.703009	2.82571	0.0588235	0.274673	0.232783	8403	tags=88%, list=23%, signal=68%	CDK7/TAF9/TAF7/POLR1E/GTF2H2C/POLR1D/POLR2K/POLR2C/GTF2A2/POLR3K/GTF2H3/GTF2B/GTF2F2/POLR2G/POLR1B/POLR2H/POLR2I/GTF2H2/TAF5/TAF12/CCNH/GTF2E2/MNAT1/ILK/GTF2E1/POLR2J/POLR2E/TAF6/POLR3B/TAF13/POLR3H/TBP/POLR1A/POLR3D/POLR2A/GTF2H1/ERCC2
WP_METABOLIC_REPROGRAMMING_IN_COLON_CANCER	WP_METABOLIC_REPROGRAMMING_IN_COLON_CANCER	42	0.701603	2.82007	0.0588235	0.274673	0.232783	6180	tags=71%, list=17%, signal=59%	LDHA/PSAT1/GAPDH/SLC2A1/PGK1/SHMT2/TKT/PGAM1/PAICS/ENO1/GART/PKM/MDH2/SDHB/PSPH/PDHB/GOT2/PPAT/FH/SUCLG2/GPI/G6PD/PGD/GLUD1/DLST/TALDO1/TIGAR/ACLY/SLC16A3/IDH3A
BIOCARTA_P53_PATHWAY	BIOCARTA_P53_PATHWAY	16	0.55296	1.62504	0.0594059	0.274673	0.232783	8084	tags=69%, list=22%, signal=54%	PCNA/CDK4/GADD45A/CDK2/TP53/CCNE1/CDKN1A/E2F1/RB1/CCND1/BAX
PID_SMAD2_3PATHWAY	PID_SMAD2_3PATHWAY	16	0.518362	1.52337	0.0594059	0.274673	0.232783	5873	tags=25%, list=16%, signal=21%	KPNA2/KPNB1/NUP153/UBE2I
REACTOME_FGFR1_LIGAND_BINDING_AND_ACTIVATION	REACTOME_FGFR1_LIGAND_BINDING_AND_ACTIVATION	16	0.541617	1.59171	0.0594059	0.274673	0.232783	98	tags=19%, list=0%, signal=19%	FGF4/FGF5/FGF8
REACTOME_NRIF_SIGNALS_CELL_DEATH_FROM_THE_NUCLEUS	REACTOME_NRIF_SIGNALS_CELL_DEATH_FROM_THE_NUCLEUS	16	0.523745	1.53919	0.0594059	0.274673	0.232783	7069	tags=56%, list=19%, signal=45%	SQSTM1/RPS27A/UBA52/UBB/ITGB3BP/UBC/PSENEN/NCSTN/APH1A
REACTOME_SPRY_REGULATION_OF_FGF_SIGNALING	REACTOME_SPRY_REGULATION_OF_FGF_SIGNALING	16	0.547596	1.60928	0.0594059	0.274673	0.232783	7487	tags=56%, list=20%, signal=45%	RPS27A/PPP2CA/UBA52/UBB/SPRY2/UBC/PPP2CB/PTPN11/PPP2R1A
REACTOME_ER_QUALITY_CONTROL_COMPARTMENT_ERQC_	REACTOME_ER_QUALITY_CONTROL_COMPARTMENT_ERQC_	21	0.444394	1.43133	0.0606061	0.278209	0.23578	5897	tags=33%, list=16%, signal=28%	RPS27A/UBA52/RNF5/UBB/RNF139/EDEM2/UBC
REACTOME_GLUTAMATE_AND_GLUTAMINE_METABOLISM	REACTOME_GLUTAMATE_AND_GLUTAMINE_METABOLISM	14	0.563013	1.59439	0.0614035	0.278209	0.23578	8992	tags=64%, list=25%, signal=49%	GOT2/GLUD1/GLUD2/GLS2/ALDH18A1/PYCR3/OAT/PYCR1/PYCR2
REACTOME_SHC1_EVENTS_IN_EGFR_SIGNALING	REACTOME_SHC1_EVENTS_IN_EGFR_SIGNALING	14	0.574887	1.62801	0.0614035	0.278209	0.23578	6674	tags=57%, list=18%, signal=47%	EREG/AREG/TGFA/KRAS/NRAS/EGFR/HBEGF/SHC1
REACTOME_CELL_EXTRACELLULAR_MATRIX_INTERACTIONS	REACTOME_CELL_EXTRACELLULAR_MATRIX_INTERACTIONS	18	0.47892	1.49052	0.0617284	0.278209	0.23578	8577	tags=56%, list=23%, signal=43%	FLNC/ACTG1/PXN/ITGB1/ILK/ACTB/VASP/RSU1/PARVB/FERMT2
KEGG_ALANINE_ASPARTATE_AND_GLUTAMATE_METABOLISM	KEGG_ALANINE_ASPARTATE_AND_GLUTAMATE_METABOLISM	32	0.440332	1.58621	0.0625	0.278209	0.23578	6803	tags=50%, list=19%, signal=41%	AGXT2/CPS1/ASNS/GOT1/ADSL/ASS1/GOT2/PPAT/GLUD1/NIT2/GLUD2/GFPT2/GPT2/CAD/ALDH5A1/GLS2
PID_HNF3A_PATHWAY	PID_HNF3A_PATHWAY	43	0.419691	1.73147	0.0625	0.278209	0.23578	2251	tags=21%, list=6%, signal=20%	GCG/DSCAM/KLK3/VTN/SERPINA1/SFTPA2/ATP5PF/SFTPA1/SOD1
PID_INTEGRIN3_PATHWAY	PID_INTEGRIN3_PATHWAY	43	0.43265	1.78493	0.0625	0.278209	0.23578	5618	tags=37%, list=15%, signal=32%	FGA/TGFBI/VTN/EDIL3/FGB/IBSP/PLAU/FGG/SPP1/ITGB3/HMGB1/PLAUR/L1CAM/SDC4/TNC/PVR
REACTOME_FORMATION_OF_INCISION_COMPLEX_IN_GG_NER	REACTOME_FORMATION_OF_INCISION_COMPLEX_IN_GG_NER	43	0.660988	2.72696	0.0625	0.278209	0.23578	8403	tags=72%, list=23%, signal=56%	CDK7/RPS27A/RPA3/UBE2N/UBA52/SUMO3/SUMO2/GTF2H5/SUMO1/UBB/GTF2H3/RAD23B/UBE2V2/RAD23A/CHD1L/RBX1/RPA1/PARP1/RPA2/GTF2H2/ERCC1/CCNH/MNAT1/UBE2I/UBC/DDB1/PARP2/CUL4B/DDB2/GTF2H1/ERCC2
REACTOME_HIV_TRANSCRIPTION_ELONGATION	REACTOME_HIV_TRANSCRIPTION_ELONGATION	43	0.538497	2.22162	0.0625	0.278209	0.23578	8403	tags=70%, list=23%, signal=54%	CDK7/ELOC/SUPT4H1/POLR2K/NELFE/POLR2C/GTF2H5/SSRP1/GTF2H3/ELOB/GTF2F2/TCEA1/POLR2D/POLR2G/POLR2H/POLR2I/SUPT16H/GTF2H2/POLR2L/NCBP2/CCNH/GTF2F1/MNAT1/POLR2J/POLR2E/NELFA/NELFCD/POLR2A/GTF2H1/ERCC2
REACTOME_NEGATIVE_REGULATION_OF_MAPK_PATHWAY	REACTOME_NEGATIVE_REGULATION_OF_MAPK_PATHWAY	43	0.487756	2.01228	0.0625	0.278209	0.23578	8567	tags=58%, list=23%, signal=45%	RPS27A/PPP2CA/UBA52/KRAS/DUSP5/DUSP6/UBB/DUSP1/MAP2K1/PAQR3/NRAS/DUSP7/PEBP1/PPP2R5D/UBC/YWHAB/PPP2R5A/PPP2CB/DUSP2/PPP2R5E/PPP2R5C/PPP2R1A/MAP2K2/BRAP/PPP5C
REACTOME_PYRUVATE_METABOLISM	REACTOME_PYRUVATE_METABOLISM	31	0.441898	1.57712	0.0625	0.278209	0.23578	6645	tags=52%, list=18%, signal=42%	SLC16A1/LDHB/LDHA/VDAC1/ME1/GLO1/PDHB/GSTZ1/MPC2/MPC1/DLD/SLC16A3/DLAT/BSG/PDK3/PDHX
REACTOME_SIGNALING_BY_FGFR2_IN_DISEASE	REACTOME_SIGNALING_BY_FGFR2_IN_DISEASE	43	0.404694	1.6696	0.0625	0.278209	0.23578	6005	tags=37%, list=16%, signal=31%	FGF4/FGF5/FGF8/KRAS/POLR2K/POLR2C/GTF2F2/POLR2D/POLR2G/POLR2H/POLR2I/NRAS/POLR2L/NCBP2/GTF2F1/FGF3
REACTOME_TAK1_ACTIVATES_NFKB_BY_PHOSPHORYLATION_AND_ACTIVATION_OF_IKKS_COMPLEX	REACTOME_TAK1_ACTIVATES_NFKB_BY_PHOSPHORYLATION_AND_ACTIVATION_OF_IKKS_COMPLEX	32	0.420371	1.51431	0.0625	0.278209	0.23578	9160	tags=50%, list=25%, signal=38%	S100B/RPS27A/UBE2N/UBA52/HMGB1/UBB/RIPK2/IRAK2/UBC/NKIRAS1/CHUK/IRAK1/RELA/APP/TAB2/NKIRAS2
REACTOME_THROMBIN_SIGNALLING_THROUGH_PROTEINASE_ACTIVATED_RECEPTORS_PARS_	REACTOME_THROMBIN_SIGNALLING_THROUGH_PROTEINASE_ACTIVATED_RECEPTORS_PARS_	32	0.428387	1.54318	0.0625	0.278209	0.23578	6321	tags=31%, list=17%, signal=26%	F2/GNG11/GNGT2/GNG4/GNG10/F2RL2/GNG5/GNGT1/GNB2/GNG12
REACTOME_TRANSPORT_OF_MATURE_MRNAS_DERIVED_FROM_INTRONLESS_TRANSCRIPTS	REACTOME_TRANSPORT_OF_MATURE_MRNAS_DERIVED_FROM_INTRONLESS_TRANSCRIPTS	43	0.639805	2.63957	0.0625	0.278209	0.23578	10443	tags=79%, list=29%, signal=57%	NUP37/SLBP/ALYREF/CPSF3/NUP35/NUP88/EIF4E/NDC1/CPSF4/SEH1L/RAE1/NUP54/NUP210/NUP153/NCBP2/NUP93/NUP107/CPSF2/SEC13/NUP205/NUP155/NUP133/FIP1L1/NUP160/NUP43/SYMPK/NUP85/AAAS/NUP98/NUP62/NCBP1/POM121C/NUP58/POM121
REACTOME_TRNA_MODIFICATION_IN_THE_NUCLEUS_AND_CYTOSOL	REACTOME_TRNA_MODIFICATION_IN_THE_NUCLEUS_AND_CYTOSOL	43	0.455394	1.87877	0.0625	0.278209	0.23578	9842	tags=63%, list=27%, signal=46%	THG1L/TPRKB/TRMT10A/TRMT112/WDR4/TRMT12/TRMT6/TYW3/URM1/CTU2/EPRS1/PUS7/TP53RK/FTSJ1/LAGE3/TRMT5/CDKAL1/PUS3/NSUN2/PUS1/QTRT2/METTL1/ALKBH8/LCMT2/TYW1/TRMT1/OSGEP
WP_FAS_LIGAND_FASL_PATHWAY_AND_STRESS_INDUCTION_OF_HEAT_SHOCK_PROTEINS_HSP_REGULATION	WP_FAS_LIGAND_FASL_PATHWAY_AND_STRESS_INDUCTION_OF_HEAT_SHOCK_PROTEINS_HSP_REGULATION	43	0.394723	1.62846	0.0625	0.278209	0.23578	8120	tags=47%, list=22%, signal=36%	LMNB1/CYCS/MAPKAPK3/ACTG1/FAS/RIPK2/PARP1/CASP6/DFFA/LMNB2/FADD/HSPB1/PRKDC/ACTB/DAXX/PAK2/CASP9/FAF1/RB1/MAP2K4
WP_GABA_RECEPTOR_SIGNALING	WP_GABA_RECEPTOR_SIGNALING	31	0.457116	1.63143	0.0625	0.278209	0.23578	1573	tags=26%, list=4%, signal=25%	GABRA5/GABRB1/GABRB2/GABRG3/GABRQ/GABRA1/SLC32A1/GABRA2
REACTOME_INFECTION_WITH_MYCOBACTERIUM_TUBERCULOSIS	REACTOME_INFECTION_WITH_MYCOBACTERIUM_TUBERCULOSIS	27	0.444569	1.55072	0.0638298	0.283541	0.240299	6489	tags=37%, list=18%, signal=30%	PGK1/RPS27A/ENO1/UBA52/UBB/KPNB1/RAB7A/B2M/UBC/ATP6V1H
REACTOME_THE_ROLE_OF_NEF_IN_HIV_1_REPLICATION_AND_DISEASE_PATHOGENESIS	REACTOME_THE_ROLE_OF_NEF_IN_HIV_1_REPLICATION_AND_DISEASE_PATHOGENESIS	28	0.449108	1.6295	0.0652174	0.288397	0.244414	8248	tags=50%, list=23%, signal=39%	AP1S1/AP1M2/AP2S1/AP2M1/B2M/AP1S2/AP2B1/ATP6V1H/AP1S3/PAK2/CD8B/ARF1/HLA-A/RAC1
WP_PHYTOCHEMICAL_ACTIVITY_ON_NRF2_TRANSCRIPTIONAL_ACTIVATION	WP_PHYTOCHEMICAL_ACTIVITY_ON_NRF2_TRANSCRIPTIONAL_ACTIVATION	15	0.514069	1.49094	0.0654206	0.288397	0.244414	6342	tags=47%, list=17%, signal=39%	GCLC/AIMP2/NQO1/SLC7A11/GCLM/KEAP1/EPHB2
REACTOME_TCF_DEPENDENT_SIGNALING_IN_RESPONSE_TO_WNT	REACTOME_TCF_DEPENDENT_SIGNALING_IN_RESPONSE_TO_WNT	231	-0.501477	-1.15775	0.0659341	0.288397	0.244414	5318	tags=16%, list=15%, signal=14%	H2AC8/H2BC8/H4C8/RSPO1/H3C4/H3C8/H2BC11/H2BU1/H2BC1/SOST/H4C11/H3-4/H2AC20/WNT3A/H2AC7/H4-16/H2BC17/H3C13/H2BC9/H3C12/H2BC13/H2BC7/H2BC6/H4C5/H3C1/H4C2/H2AC4/H2AC14/H4C1/H2BC14/H3C7/H4C3/H3C11/H4C4/H2BC10/H2BC3/H4C13/H4C6
WP_TRANSSULFURATION_PATHWAY	WP_TRANSSULFURATION_PATHWAY	10	0.59788	1.61533	0.0662651	0.288397	0.244414	5573	tags=60%, list=15%, signal=51%	AHCY/GOT1/MAT2B/CTH/GCLM/CBS
PID_HNF3B_PATHWAY	PID_HNF3B_PATHWAY	45	0.531614	2.26908	0.0666667	0.288397	0.244414	94	tags=11%, list=0%, signal=11%	G6PC/AFP/IGFBP1/F2/PCK1
PID_ILK_PATHWAY	PID_ILK_PATHWAY	45	0.385347	1.64477	0.0666667	0.288397	0.244414	8669	tags=51%, list=24%, signal=39%	AURKA/NACA/RUVBL1/HSP90AA1/TACC3/DIAPH1/RUVBL2/CTNNB1/PARP1/CDC42/PXN/PPP1R14B/ILK/CKAP5/XPO1/CCND1/RAC1/IQGAP1/PARVB/RHOG/SNAI1/CDC37/ZYX
PID_PLK1_PATHWAY	PID_PLK1_PATHWAY	45	0.721555	3.0798	0.0666667	0.288397	0.244414	5883	tags=64%, list=16%, signal=54%	CCNB1/CDC25C/KIF20A/AURKA/CDK1/PLK1/TPT1/SGO1/CDC20/TPX2/BUB1/CENPU/ECT2/BUB1B/PRC1/NDC80/SPC24/PPP2CA/CENPE/FBXO5/CLSPN/ERCC6L/FBXW11/INCENP/RHOA/BORA/TUBG1/PPP1CB/KIF2A
REACTOME_METABOLISM_OF_PORPHYRINS	REACTOME_METABOLISM_OF_PORPHYRINS	26	0.443263	1.48314	0.0666667	0.288397	0.244414	7019	tags=50%, list=19%, signal=40%	FABP1/ABCC2/ALB/SLCO1B3/BLVRB/UROS/UROD/COX15/HMBS/FECH/COX10/BLVRA/CPOX
REACTOME_N_GLYCAN_ANTENNAE_ELONGATION_IN_THE_MEDIAL_TRANS_GOLGI	REACTOME_N_GLYCAN_ANTENNAE_ELONGATION_IN_THE_MEDIAL_TRANS_GOLGI	26	0.434502	1.45383	0.0666667	0.288397	0.244414	295	tags=8%, list=1%, signal=8%	CGA/CHST8
REACTOME_SIGNALING_BY_MODERATE_KINASE_ACTIVITY_BRAF_MUTANTS	REACTOME_SIGNALING_BY_MODERATE_KINASE_ACTIVITY_BRAF_MUTANTS	45	0.349973	1.49378	0.0666667	0.288397	0.244414	6286	tags=29%, list=17%, signal=24%	FGA/FGB/FGG/ITGB3/PHB/KRAS/ACTG1/MAP2K1/NRAS/PEBP1/RAP1B/YWHAB/ACTB
WP_ATM_SIGNALING_NETWORK_IN_DEVELOPMENT_AND_DISEASE	WP_ATM_SIGNALING_NETWORK_IN_DEVELOPMENT_AND_DISEASE	45	0.438433	1.87135	0.0666667	0.288397	0.244414	9387	tags=56%, list=26%, signal=41%	CDK1/AURKB/BUB1/CHEK1/G6PD/RAD50/NBN/HSPB1/RBBP8/CDK5/RNF8/TRIM28/PRKDC/HMGN1/KAT5/LBR/MDC1/H2AX/CHEK2/CDK5R1/PTPA/PPP5C/SMC1A/ATMIN/ATF2
WP_PPAR_ALPHA_PATHWAY	WP_PPAR_ALPHA_PATHWAY	26	0.427532	1.43051	0.0666667	0.288397	0.244414	6150	tags=50%, list=17%, signal=42%	FABP1/APOC3/MYC/CDK1/KLK15/APOA1/CDK4/APOA5/EHHADH/ACADM/DBI/PLTP/APOA2
WP_PROSTAGLANDIN_SYNTHESIS_AND_REGULATION	WP_PROSTAGLANDIN_SYNTHESIS_AND_REGULATION	45	0.317831	1.35659	0.0666667	0.288397	0.244414	6564	tags=40%, list=18%, signal=33%	ANXA1/CYP11A1/HPGD/HSD11B1/AKR1C3/S100A10/CBR1/S100A6/ANXA2/PPARG/AKR1C1/AKR1C2/AKR1B1/PTGES/HPGDS/PTGER2/ANXA5/ANXA3
KEGG_PROPANOATE_METABOLISM	KEGG_PROPANOATE_METABOLISM	33	0.381045	1.42236	0.0689655	0.289757	0.245567	6688	tags=55%, list=18%, signal=45%	LDHB/LDHA/PCCB/ACAT2/SUCLG1/SUCLG2P2/SUCLG2/ALDH7A1/ECHS1/HADHA/ALDH1B1/SUCLA2/EHHADH/ACADM/PCCA/ALDH9A1/ACAT1/MMUT
REACTOME_AMINO_ACID_TRANSPORT_ACROSS_THE_PLASMA_MEMBRANE	REACTOME_AMINO_ACID_TRANSPORT_ACROSS_THE_PLASMA_MEMBRANE	33	0.433883	1.61959	0.0689655	0.289757	0.245567	6710	tags=33%, list=18%, signal=27%	SLC6A15/SLC7A3/SLC6A18/SLC7A5/SLC7A11/SLC7A1/SLC38A1/SLC43A1/SLC6A14/SLC7A2/SLC3A2
REACTOME_CARGO_CONCENTRATION_IN_THE_ER	REACTOME_CARGO_CONCENTRATION_IN_THE_ER	33	0.385617	1.43942	0.0689655	0.289757	0.245567	8321	tags=64%, list=23%, signal=49%	SERPINA1/AREG/CNIH1/TGFA/LMAN2/TMED2/FOLR1/MCFD2/PREB/CD59/CTSC/CNIH3/SEC24C/STX5/LMAN1/LMAN2L/SAR1B/SEC23A/TMED10/SEC24B/SEC24A
REACTOME_FGFR2_MUTANT_RECEPTOR_ACTIVATION	REACTOME_FGFR2_MUTANT_RECEPTOR_ACTIVATION	33	0.433688	1.61886	0.0689655	0.289757	0.245567	6005	tags=42%, list=16%, signal=35%	FGF4/FGF5/FGF8/POLR2K/POLR2C/GTF2F2/POLR2D/POLR2G/POLR2H/POLR2I/POLR2L/NCBP2/GTF2F1/FGF3
REACTOME_NEGATIVE_REGULATION_OF_FGFR1_SIGNALING	REACTOME_NEGATIVE_REGULATION_OF_FGFR1_SIGNALING	33	0.437801	1.63422	0.0689655	0.289757	0.245567	6309	tags=36%, list=17%, signal=30%	FGF4/FGF5/FGF8/RPS27A/PPP2CA/UBA52/UBB/SPRY2/UBC/FGF3/PPP2CB/PTPN11
REACTOME_SIGNALING_BY_WNT_IN_CANCER	REACTOME_SIGNALING_BY_WNT_IN_CANCER	33	0.362557	1.35335	0.0689655	0.289757	0.245567	7487	tags=39%, list=20%, signal=31%	DKK1/PPP2CA/DKK4/CSNK1A1/CTNNB1/KREMEN2/PPP2R5D/CTBP2/PPP2R5A/PPP2CB/PPP2R5E/PPP2R5C/PPP2R1A
WP_FLUOROPYRIMIDINE_ACTIVITY	WP_FLUOROPYRIMIDINE_ACTIVITY	33	0.420634	1.57014	0.0689655	0.289757	0.245567	4886	tags=42%, list=13%, signal=37%	GGH/CDA/RRM2/TYMS/TK1/DHFR/RRM1/CYP2A6/PPAT/TP53/UMPS/UCK2/TDG/UPP1
WP_OXIDATIVE_STRESS	WP_OXIDATIVE_STRESS	33	0.405076	1.51206	0.0689655	0.289757	0.245567	5807	tags=39%, list=16%, signal=33%	UGT1A6/TXNRD1/GCLC/SOD1/MGST1/GSR/MT1X/GPX1/TXN2/NQO1/MAOA/XDH/GPX3
REACTOME_P75NTR_SIGNALS_VIA_NF_KB	REACTOME_P75NTR_SIGNALS_VIA_NF_KB	16	0.505256	1.48485	0.0693069	0.289757	0.245567	8592	tags=62%, list=23%, signal=48%	SQSTM1/RPS27A/UBA52/UBB/RIPK2/UBC/MYD88/IRAK1/PRKCI/RELA
WP_APOPTOSIS_MODULATION_BY_HSP70	WP_APOPTOSIS_MODULATION_BY_HSP70	19	0.482592	1.52304	0.0694444	0.289757	0.245567	9936	tags=63%, list=27%, signal=46%	CYCS/HSPA1A/FAS/CASP6/FADD/TNFRSF1A/BID/CASP9/AIFM1/CASP3/CASP8/NFKB1
BIOCARTA_ACTINY_PATHWAY	BIOCARTA_ACTINY_PATHWAY	12	0.547805	1.50496	0.0703125	0.289757	0.245567	9824	tags=67%, list=27%, signal=49%	PIR/PSMA7/WASF1/NCK1/NCKAP1/RAC1/WASL/ACTA1
KEGG_AMINO_SUGAR_AND_NUCLEOTIDE_SUGAR_METABOLISM	KEGG_AMINO_SUGAR_AND_NUCLEOTIDE_SUGAR_METABOLISM	44	0.452667	1.92667	0.0714286	0.289757	0.245567	8560	tags=48%, list=23%, signal=37%	CHIA/UGDH/GNPNAT1/GNPDA1/CMAS/PGM2/GPI/HK2/PGM1/UGP2/TSTA3/GNPDA2/GFPT2/MPI/PMM1/HEXB/GALK1/CYB5R1/UXS1/FPGT/HK1
KEGG_LYSINE_DEGRADATION	KEGG_LYSINE_DEGRADATION	44	0.457454	1.94704	0.0714286	0.289757	0.245567	9004	tags=57%, list=25%, signal=43%	OGDHL/ACAT2/PIPOX/HADH/PLOD2/ALDH7A1/SUV39H1/ECHS1/HADHA/ALDH1B1/EHHADH/DLST/SUV39H2/TMLHE/ALDH9A1/ACAT1/NSD2/AASDHPPT/SETMAR/PLOD1/GCDH/KMT5A/SETD7/EHMT2/AADAT
KEGG_N_GLYCAN_BIOSYNTHESIS	KEGG_N_GLYCAN_BIOSYNTHESIS	46	0.377097	1.64098	0.0714286	0.289757	0.245567	8279	tags=52%, list=23%, signal=40%	MGAT5B/DAD1/ALG5/RFT1/DPM1/MGAT4B/ALG3/MAN2A1/GANAB/TUSC3/ALG14/DDOST/RPN1/RPN2/STT3B/DOLPP1/B4GALT3/DPM2/MGAT1/ALG8/STT3A/ALG1/ALG10/B4GALT1
KEGG_NUCLEOTIDE_EXCISION_REPAIR	KEGG_NUCLEOTIDE_EXCISION_REPAIR	44	0.607756	2.58677	0.0714286	0.289757	0.245567	6284	tags=57%, list=17%, signal=47%	CDK7/RFC4/RFC3/POLE3/PCNA/RPA3/RFC5/RFC2/POLE4/GTF2H5/POLE2/POLD2/GTF2H3/ERCC8/RAD23B/RAD23A/RBX1/RPA1/RPA2/GTF2H2/ERCC1/CCNH/MNAT1/RFC1/DDB1
KEGG_PROTEASOME	KEGG_PROTEASOME	46	0.779436	3.3918	0.0714286	0.289757	0.245567	7457	tags=89%, list=20%, signal=71%	PSMA6/PSMB8/PSMB9/PSME1/PSMD8/PSMA5/PSMA4/PSMB7/POMP/PSMD14/PSMB5/PSMA3/PSMD2/PSMB1/PSMA7/PSMC6/PSME3/PSMB6/PSME2/PSMD13/PSMA1/PSMD7/PSMC2/PSMC1/PSMD11/PSMC4/PSMB4/PSMC3/PSMA2/PSMB3/PSMB2/PSMD6/PSMD12/SEM1/PSMD1/PSMF1/PSMD4/PSMC5/PSMD3/PSMB10/PSMC1P4
KEGG_VALINE_LEUCINE_AND_ISOLEUCINE_DEGRADATION	KEGG_VALINE_LEUCINE_AND_ISOLEUCINE_DEGRADATION	44	0.501224	2.13334	0.0714286	0.289757	0.245567	8452	tags=66%, list=23%, signal=51%	BCAT1/MCCC2/PCCB/ACAT2/HADH/ALDH7A1/ECHS1/HADHA/ALDH1B1/EHHADH/HSD17B10/ACADM/DLD/PCCA/ACADSB/HADHB/HIBADH/ACAA2/BCKDHA/ALDH9A1/ACAT1/IVD/MMUT/ACADS/ACAA1/MCEE/DBT/ALDH6A1/AUH
PID_A6B1_A6B4_INTEGRIN_PATHWAY	PID_A6B1_A6B4_INTEGRIN_PATHWAY	46	0.358312	1.55923	0.0714286	0.289757	0.245567	6799	tags=37%, list=19%, signal=30%	YWHAE/YWHAQ/MET/LAMC2/YWHAZ/LAMA1/SFN/RXRG/YWHAG/LAMB3/ITGB1/CD9/EGFR/YWHAB/ITGA6/SHC1/LAMC1
PID_FANCONI_PATHWAY	PID_FANCONI_PATHWAY	46	0.552561	2.40453	0.0714286	0.289757	0.245567	7513	tags=61%, list=21%, signal=48%	UBE2T/RFC4/RFC3/RFC5/RFC2/FANCI/CHEK1/FANCE/FAAP24/FBXW11/FANCD2/RAD50/RPA1/NBN/RPA2/BLM/CENPS/BRCA1/RAD17/TOPBP1/USP1/RMI1/FANCG/RAD1/FANCB/BRIP1/H2AX/FANCA
PID_INSULIN_PATHWAY	PID_INSULIN_PATHWAY	44	0.372279	1.58452	0.0714286	0.289757	0.245567	22996	tags=100%, list=63%, signal=37%	EIF4EBP1/F2RL2/NCK1/EXOC6/PTPN11/SHC1/GRB10/EXOC2/CAV1/EXOC4/INS/RASA1/PRKCI/DOK1/CRK/EXOC5/GRB14/HRAS/AKT2/GRB2/TRIP10/RPS6KB1/EXOC3/PTPRA/EXOC1/PTPN1/EXOC7/SGK1/AKT1/NCK2/RHOQ/PIK3CA/PARD6A/PRKCZ/IRS1/SOS1/SORBS1/PDPK1/FOXO3/SH2B2/CBL/INSR/PIK3R1/RAPGEF1
PID_TNF_PATHWAY	PID_TNF_PATHWAY	46	0.339697	1.47823	0.0714286	0.289757	0.245567	24188	tags=100%, list=66%, signal=34%	RACK1/NRK/SQSTM1/TXN/FADD/TNFRSF1A/STAT1/BAG4/MAP4K4/CAV1/CHUK/NSMAF/PRKCI/RELA/TAB2/ADAM17/RFFL/CASP8/NFKB1/MAP3K7/TAB1/MAP2K3/BIRC2/MAP4K3/BIRC3/IKBKG/MAP2K7/SMPD2/TNFRSF1B/RIPK1/PRKCZ/TNIK/IKBKB/SMPD1/MAP4K5/TRADD/TRAF2/MAP3K1/TNFAIP3/CYLD/MADD/MAP3K3/TNF/TRAF1/MAP3K5/MAP4K2
REACTOME_AGGREPHAGY	REACTOME_AGGREPHAGY	44	0.443877	1.88926	0.0714286	0.289757	0.245567	6118	tags=45%, list=17%, signal=38%	TUBA3C/TUBA1C/RPS27A/TUBA1B/DYNC1I1/UBE2N/UBA52/HSP90AA1/TUBA4A/TUBA3E/UBB/PARK7/DYNC1LI1/TUBB6/VIM/DYNLL1/DYNC1I2/UBC/HSF1/TUBB3
REACTOME_INTERLEUKIN_12_SIGNALING	REACTOME_INTERLEUKIN_12_SIGNALING	46	0.484929	2.11022	0.0714286	0.289757	0.245567	8638	tags=63%, list=24%, signal=48%	RPLP0/GSTO1/LMNB1/HSPA9/SOD1/TCP1/PPIA/MIF/PSME2/MSN/HNRNPF/ANXA2/AIP/CDC42/CAPZA1/TALDO1/RAP1B/CFL1/SNRPA1/MTAP/CNN2/PAK2/VAMP7/ARF1/BOLA2B/P4HB/RALA/LCP1/HNRNPA2B1
REACTOME_SUMOYLATION_OF_DNA_REPLICATION_PROTEINS	REACTOME_SUMOYLATION_OF_DNA_REPLICATION_PROTEINS	46	0.688318	2.99529	0.0714286	0.289757	0.245567	6254	tags=54%, list=17%, signal=45%	BIRC5/AURKA/AURKB/NUP37/TOP2A/PCNA/CDCA8/NUP35/SUMO3/TOP1/SUMO2/NUP88/SUMO1/INCENP/NDC1/SEH1L/RAE1/NUP54/NUP210/NUP153/NUP93/NUP107/UBE2I/SEC13/NUP205
REACTOME_TP53_REGULATES_TRANSCRIPTION_OF_CELL_DEATH_GENES	REACTOME_TP53_REGULATES_TRANSCRIPTION_OF_CELL_DEATH_GENES	44	0.406607	1.73063	0.0714286	0.289757	0.245567	8106	tags=52%, list=22%, signal=41%	PMAIP1/BIRC5/PRELID1/TRIAP1/NDRG1/CRADD/TP53/STEAP3/FAS/TNFRSF10A/CASP6/TNFRSF10D/PERP/TP53I3/BID/AIFM2/TNFRSF10B/CHM/BNIP3L/RABGGTB/TMEM219/BAX/RABGGTA
REACTOME_TRANSCRIPTIONAL_ACTIVITY_OF_SMAD2_SMAD3_SMAD4_HETEROTRIMER	REACTOME_TRANSCRIPTIONAL_ACTIVITY_OF_SMAD2_SMAD3_SMAD4_HETEROTRIMER	44	0.418723	1.78219	0.0714286	0.289757	0.245567	9380	tags=45%, list=26%, signal=34%	MYC/RPS27A/UBA52/UBB/CCNC/UBE2D3/WWTR1/PARP1/E2F5/TFDP1/SNW1/UBC/TGIF2/CDK8/UBE2D1/CCNK/E2F4/HDAC1/RBL1/TGIF1
REACTOME_VIRAL_MESSENGER_RNA_SYNTHESIS	REACTOME_VIRAL_MESSENGER_RNA_SYNTHESIS	44	0.630157	2.68212	0.0714286	0.289757	0.245567	9760	tags=77%, list=27%, signal=57%	NUP37/NUP35/POLR2K/POLR2C/NUP88/GTF2F2/POLR2D/POLR2G/NDC1/POLR2H/SEH1L/POLR2I/RAE1/NUP54/NUP210/NUP153/POLR2L/GTF2F1/NUP93/NUP107/SEC13/NUP205/POLR2J/NUP155/POLR2E/NUP133/POLR2A/NUP160/NUP43/NUP85/AAAS/POLR2B/NUP98/NUP62
WP_BLOOD_CLOTTING_CASCADE	WP_BLOOD_CLOTTING_CASCADE	23	0.446487	1.50087	0.0714286	0.289757	0.245567	1471	tags=26%, list=4%, signal=25%	F2/FGA/F12/FGB/PLAU/FGG
WP_ENDOPLASMIC_RETICULUM_STRESS_RESPONSE_IN_CORONAVIRUS_INFECTION	WP_ENDOPLASMIC_RETICULUM_STRESS_RESPONSE_IN_CORONAVIRUS_INFECTION	46	0.440417	1.91652	0.0714286	0.289757	0.245567	6142	tags=39%, list=17%, signal=33%	PPP1R3A/PPP1R1B/PPP1R1A/PPP1R1C/EIF2S1/PPP1CC/PPP1R14D/PPP1R3G/PPP1CA/DDIT3/MBTPS2/PPP1R8/HSPA5/PPP1R11/PPP1R14B/PPP1CB/ATF4/PPP1R2
WP_GLYCOLYSIS_AND_GLUCONEOGENESIS	WP_GLYCOLYSIS_AND_GLUCONEOGENESIS	44	0.624463	2.65788	0.0714286	0.289757	0.245567	4879	tags=59%, list=13%, signal=51%	G6PC/PCK1/LDHB/LDHA/GAPDH/SLC2A1/PGK1/PGAM1/TPI1/GOT1/ENO1/ALDOA/MDH1/SLC2A3/PKM/MDH2/PFKP/GOT2/ALDOC/GPI/HK2/PFKM/MPC2/MPC1/DLD/PGK2
WP_HEART_DEVELOPMENT	WP_HEART_DEVELOPMENT	44	0.38446	1.63636	0.0714286	0.289757	0.245567	2414	tags=16%, list=7%, signal=15%	NKX2-5/FGF8/HAND2/ISL1/HEY1/VEGFC/PITX2
WP_INTEGRATED_CANCER_PATHWAY	WP_INTEGRATED_CANCER_PATHWAY	44	0.435173	1.85221	0.0714286	0.289757	0.245567	8084	tags=52%, list=22%, signal=41%	MYC/CDK1/PLK1/CDC25A/CDK4/CHEK1/CDK2/MSH2/TP53/ATF1/RAD50/MSH6/CDKN1A/BLM/BRCA1/STAT1/E2F1/CHEK2/CASP9/CDKN1B/RB1/CDC25B/BAX
WP_NUCLEOTIDE_EXCISION_REPAIR	WP_NUCLEOTIDE_EXCISION_REPAIR	44	0.686392	2.92146	0.0714286	0.289757	0.245567	6284	tags=59%, list=17%, signal=49%	CDK7/RFC4/RFC3/POLE3/PCNA/RPA3/RFC5/GTF2H2C/RFC2/POLE4/GTF2H5/POLE2/POLD2/GTF2H3/ERCC8/RAD23B/RAD23A/RBX1/RPA1/RPA2/GTF2H2/ERCC1/CCNH/MNAT1/RFC1/DDB1
WP_METASTATIC_BRAIN_TUMOR	WP_METASTATIC_BRAIN_TUMOR	20	-0.669345	-1.35634	0.0728832	0.293966	0.249133	5780	tags=55%, list=16%, signal=46%	MIRLET7D/MIRLET7G/MIRLET7C/MIRLET7BHG/MIR101-1/MIR148B/MIR34C/MIRLET7A1/MIR34B/MIRLET7A2/MIRLET7F1
KEGG_FOLATE_BIOSYNTHESIS	KEGG_FOLATE_BIOSYNTHESIS	11	0.575302	1.55243	0.0729927	0.293966	0.249133	5476	tags=45%, list=15%, signal=39%	GGH/ALPP/DHFR/SPR/QDPR
KEGG_CYSTEINE_AND_METHIONINE_METABOLISM	KEGG_CYSTEINE_AND_METHIONINE_METABOLISM	34	0.421638	1.55034	0.0740741	0.293966	0.249133	7045	tags=53%, list=19%, signal=43%	MAT1A/LDHB/BHMT/AHCY/LDHA/GOT1/MAT2B/GOT2/CTH/SMS/AMD1/AHCYL2/ENOPH1/CBS/SRM/ADI1/AHCYL1/MTAP
PID_HDAC_CLASSII_PATHWAY	PID_HDAC_CLASSII_PATHWAY	34	0.368605	1.35534	0.0740741	0.293966	0.249133	6446	tags=35%, list=18%, signal=29%	RAN/TUBA1B/YWHAE/HDAC3/HSP90AA1/SUMO1/RFXANK/NR3C1/ESR1/UBE2I/YWHAB/ANKRA2
PID_HIF2PATHWAY	PID_HIF2PATHWAY	34	0.426184	1.56705	0.0740741	0.293966	0.249133	6399	tags=38%, list=17%, signal=32%	EIF3E/SLC2A1/PGK1/APEX1/ELOC/TWIST1/ELOB/FXN/EGLN1/EGLN3/BHLHE40/ELK1/CITED2
PID_IL2_PI3K_PATHWAY	PID_IL2_PI3K_PATHWAY	34	0.415895	1.52922	0.0740741	0.293966	0.249133	8592	tags=38%, list=23%, signal=29%	RPS6/MYC/HSP90AA1/TERT/EIF3A/IL2RA/SGMS1/PTPN11/SHC1/E2F1/BCL2L1/RAC1/RELA
REACTOME_NEGATIVE_REGULATION_OF_FGFR2_SIGNALING	REACTOME_NEGATIVE_REGULATION_OF_FGFR2_SIGNALING	34	0.417315	1.53444	0.0740741	0.293966	0.249133	2324	tags=18%, list=6%, signal=17%	FGF4/FGF5/FGF8/RPS27A/PPP2CA/UBA52
REACTOME_PURINE_CATABOLISM	REACTOME_PURINE_CATABOLISM	18	0.470485	1.46427	0.0740741	0.293966	0.249133	5732	tags=50%, list=16%, signal=42%	NT5E/PNP/GPX1/DNPH1/ADPRM/NUDT15/NUDT5/NUDT1/XDH
WP_INHIBITION_OF_EXOSOME_BIOGENESIS_AND_SECRETION_BY_MANUMYCIN_A_IN_CRPC_CELLS	WP_INHIBITION_OF_EXOSOME_BIOGENESIS_AND_SECRETION_BY_MANUMYCIN_A_IN_CRPC_CELLS	18	0.469567	1.46141	0.0740741	0.293966	0.249133	10756	tags=61%, list=29%, signal=43%	KRAS/NRAS/RAB5C/RRAS/RRAS2/RAB5A/RAB5B/PDCD6IP/ARAF/HRAS/HGS
WP_TYPE_2_PAPILLARY_RENAL_CELL_CARCINOMA	WP_TYPE_2_PAPILLARY_RENAL_CELL_CARCINOMA	34	0.398574	1.46553	0.0740741	0.293966	0.249133	6557	tags=44%, list=18%, signal=36%	SLC2A1/TGFA/ELOC/DIAPH1/FH/ELOB/RBX1/ARNT2/HIF1A/CDKN1A/EGLN1/EGLN3/CUL2/CADM2/PRCC
KEGG_NON_HOMOLOGOUS_END_JOINING	KEGG_NON_HOMOLOGOUS_END_JOINING	13	0.545357	1.51156	0.0743802	0.293966	0.249133	6176	tags=54%, list=17%, signal=45%	XRCC4/FEN1/XRCC5/XRCC6/RAD50/NHEJ1/PRKDC
REACTOME_ALPHA_LINOLENIC_OMEGA3_AND_LINOLEIC_OMEGA6_ACID_METABOLISM	REACTOME_ALPHA_LINOLENIC_OMEGA3_AND_LINOLEIC_OMEGA6_ACID_METABOLISM	13	0.54239	1.50334	0.0743802	0.293966	0.249133	7754	tags=54%, list=21%, signal=42%	ELOVL2/ELOVL3/FADS1/HSD17B4/ELOVL5/ACAA1/ELOVL1
REACTOME_TRANSLATION_OF_REPLICASE_AND_ASSEMBLY_OF_THE_REPLICATION_TRANSCRIPTION_COMPLEX	REACTOME_TRANSLATION_OF_REPLICASE_AND_ASSEMBLY_OF_THE_REPLICATION_TRANSCRIPTION_COMPLEX	13	0.544451	1.50905	0.0743802	0.293966	0.249133	9640	tags=62%, list=26%, signal=45%	CHMP4C/CHMP2B/MAP1LC3B/CHMP2A/CHMP3/BECN1/CHMP7/CHMP6
WP_DISORDERS_OF_FOLATE_METABOLISM_AND_TRANSPORT	WP_DISORDERS_OF_FOLATE_METABOLISM_AND_TRANSPORT	13	0.54476	1.50991	0.0743802	0.293966	0.249133	5201	tags=62%, list=14%, signal=53%	SHMT2/TYMS/DHFR/ATIC/GART/MTHFD1/FOLR1/MTHFS
KEGG_NICOTINATE_AND_NICOTINAMIDE_METABOLISM	KEGG_NICOTINATE_AND_NICOTINAMIDE_METABOLISM	24	0.413454	1.42682	0.0754717	0.296102	0.250944	2975	tags=21%, list=8%, signal=19%	NT5E/PNP/NUDT12/NAMPT/NNMT
PID_TOLL_ENDOGENOUS_PATHWAY	PID_TOLL_ENDOGENOUS_PATHWAY	24	0.451089	1.55669	0.0754717	0.296102	0.250944	8256	tags=54%, list=23%, signal=42%	S100A9/HSPD1/SFTPA1/HMGB1/TLR3/IRAK2/RHOA/LY96/TICAM1/CHUK/MYD88/CD14/IRAK1
REACTOME_ESTROGEN_DEPENDENT_NUCLEAR_EVENTS_DOWNSTREAM_OF_ESR_MEMBRANE_SIGNALING	REACTOME_ESTROGEN_DEPENDENT_NUCLEAR_EVENTS_DOWNSTREAM_OF_ESR_MEMBRANE_SIGNALING	24	0.43443	1.4992	0.0754717	0.296102	0.250944	8112	tags=42%, list=22%, signal=32%	EREG/AREG/TGFA/ELK1/EGFR/HBEGF/CDKN1B/XPO1/CCND1/EGF
REACTOME_RAS_PROCESSING	REACTOME_RAS_PROCESSING	24	0.430362	1.48517	0.0754717	0.296102	0.250944	6402	tags=46%, list=17%, signal=38%	RPS27A/LYPLA1/GOLGA7/UBA52/KRAS/UBB/FNTA/NRAS/PDE6D/UBC/ARL2
PID_IL6_7_PATHWAY	PID_IL6_7_PATHWAY	47	0.340246	1.53429	0.0769231	0.29799	0.252544	1471	tags=11%, list=4%, signal=10%	LBP/CRP/MYC/TNFSF11/FGG
PID_LKB1_PATHWAY	PID_LKB1_PATHWAY	47	0.329104	1.48405	0.0769231	0.29799	0.252544	3990	tags=21%, list=11%, signal=19%	MYC/YWHAE/YWHAQ/HSP90AA1/PRKAG1/YWHAZ/TP53/SFN/STK26/YWHAG
REACTOME_CYCLIN_D_ASSOCIATED_EVENTS_IN_G1	REACTOME_CYCLIN_D_ASSOCIATED_EVENTS_IN_G1	47	0.584246	2.63458	0.0769231	0.29799	0.252544	8051	tags=62%, list=22%, signal=48%	CKS1B/CDK7/RPS27A/SKP1/PPP2CA/UBA52/CDK4/CDK2/UBB/CCNE1/E2F5/TFDP1/CCND3/CDKN1A/PPP2R2A/CCNH/CCNE2/MNAT1/UBC/SKP2/E2F2/PPP2CB/LYN/E2F1/PPP2R1A/E2F3/CDKN1B/RB1/CCND1
REACTOME_HIV_TRANSCRIPTION_INITIATION	REACTOME_HIV_TRANSCRIPTION_INITIATION	47	0.57983	2.61466	0.0769231	0.29799	0.252544	8403	tags=77%, list=23%, signal=59%	CDK7/TAF9/TAF7/POLR2K/POLR2C/GTF2H5/TAF4B/GTF2A2/GTF2H3/GTF2B/GTF2F2/POLR2D/POLR2G/POLR2H/POLR2I/GTF2H2/TAF5/POLR2L/TAF12/CCNH/TAF11/GTF2F1/GTF2E2/MNAT1/GTF2E1/POLR2J/POLR2E/TAF6/TAF9B/TAF13/TAF10/TBP/TAF15/POLR2A/GTF2H1/ERCC2
REACTOME_RNA_POLYMERASE_I_TRANSCRIPTION_INITIATION	REACTOME_RNA_POLYMERASE_I_TRANSCRIPTION_INITIATION	47	0.548964	2.47548	0.0769231	0.29799	0.252544	8796	tags=68%, list=24%, signal=52%	CDK7/POLR1E/ZNRD1/POLR1D/POLR2K/CD3EAP/GTF2H5/POLR1C/HDAC2/GTF2H3/TAF1B/POLR1B/POLR2H/RBBP7/GTF2H2/POLR2L/CCNH/MNAT1/TWISTNB/RBBP4/POLR2E/TTF1/CHD4/MTA3/TBP/POLR1A/GATAD2A/GTF2H1/TAF1A/ERCC2/HDAC1/EHMT2
REACTOME_SUMOYLATION_OF_RNA_BINDING_PROTEINS	REACTOME_SUMOYLATION_OF_RNA_BINDING_PROTEINS	47	0.58226	2.62562	0.0769231	0.29799	0.252544	10443	tags=72%, list=29%, signal=52%	NUP37/HNRNPC/NUP35/SUMO2/NUP88/NOP58/SUMO1/NDC1/HNRNPK/SEH1L/RAE1/RNF2/NUP54/NUP210/NUP153/NUP93/NUP107/UBE2I/SEC13/NUP205/NUP155/PHC2/BMI1/NUP133/NUP160/NUP43/NUP85/AAAS/NUP98/NUP62/CBX2/POM121C/NUP58/POM121
WP_THYMIC_STROMAL_LYMPHOPOIETIN_TSLP_SIGNALING_PATHWAY	WP_THYMIC_STROMAL_LYMPHOPOIETIN_TSLP_SIGNALING_PATHWAY	47	0.362685	1.63548	0.0769231	0.29799	0.252544	9936	tags=38%, list=27%, signal=28%	RPS6/MYC/EIF4EBP1/MAPK9/MAP2K1/IL2RA/STAT1/PTPN11/CISH/LYN/MAPK14/MAP2K2/PI4K2A/RELA/CXCL8/HCK/TNFSF4/NFKB1
BIOCARTA_GABA_PATHWAY	BIOCARTA_GABA_PATHWAY	10	0.588795	1.59078	0.0783133	0.299516	0.253837	6495	tags=70%, list=18%, signal=58%	GABRA5/GABRA1/GABRA2/GABRA3/GABARAP/UBQLN1/GPHN
BIOCARTA_RNA_PATHWAY	BIOCARTA_RNA_PATHWAY	10	0.58905	1.59148	0.0783133	0.299516	0.253837	9936	tags=70%, list=27%, signal=51%	EIF2S1/EIF2S2/TP53/CHUK/RELA/EIF2AK2/NFKB1
WP_MAMMARY_GLAND_DEVELOPMENT_PATHWAY_INVOLUTION_STAGE_4_OF_4	WP_MAMMARY_GLAND_DEVELOPMENT_PATHWAY_INVOLUTION_STAGE_4_OF_4	10	0.59287	1.60179	0.0783133	0.299516	0.253837	3469	tags=30%, list=9%, signal=27%	CHI3L1/MYC/TP53
WP_TYPE_III_INTERFERON_SIGNALING	WP_TYPE_III_INTERFERON_SIGNALING	10	0.584094	1.57809	0.0783133	0.299516	0.253837	754	tags=30%, list=2%, signal=29%	IFNL1/IFNL3/IFNL2
REACTOME_CHOLESTEROL_BIOSYNTHESIS	REACTOME_CHOLESTEROL_BIOSYNTHESIS	25	0.444051	1.51527	0.0784314	0.299516	0.253837	7322	tags=52%, list=20%, signal=42%	ACAT2/FDPS/HMGCR/IDI1/FDFT1/ARV1/EBP/PMVK/MSMO1/SQLE/LBR/NSDHL/GGPS1
REACTOME_DEADENYLATION_OF_MRNA	REACTOME_DEADENYLATION_OF_MRNA	25	0.452447	1.54392	0.0784314	0.299516	0.253837	7776	tags=56%, list=21%, signal=44%	CNOT8/EIF4B/PABPC1/PAIP1/EIF4A2/EIF4E/EIF4A3/CNOT6/CNOT10/EIF4G1/CNOT7/CNOT9/PARN/CNOT11
REACTOME_FRS_MEDIATED_FGFR2_SIGNALING	REACTOME_FRS_MEDIATED_FGFR2_SIGNALING	25	0.447733	1.52783	0.0784314	0.299516	0.253837	98	tags=12%, list=0%, signal=12%	FGF4/FGF5/FGF8
REACTOME_NOTCH3_INTRACELLULAR_DOMAIN_REGULATES_TRANSCRIPTION	REACTOME_NOTCH3_INTRACELLULAR_DOMAIN_REGULATES_TRANSCRIPTION	25	0.426994	1.45706	0.0784314	0.299516	0.253837	5840	tags=32%, list=16%, signal=27%	FABP7/DLGAP5/HEY1/SNW1/MAMLD1/MAML1/WWC1/STAT1
